# Supplementary material for: Dehydrative alkynylation of 3-hydroxyisoindolinones with terminal alkynes for the synthesis of 3-alkynylated 3,3-disubstituted isoindolinones
Source: Royal Society of Chemistry journal article supplement (doi:10.1039/d4ob00190g), 2024-01-01

# Dehydrative Alkynylation of 3-Hydroxyisoindolinones with Terminal Alkynes for the Synthesis of 3-Alkynylated 3,3-Disubstituted Isoindolinones

Kai-Cheng Yang,<sup>a</sup> Shi-Lu Zheng,<sup>a</sup> Zhong Wen,<sup>a</sup> Yu-Shan Zhang,<sup>a</sup> Hai-Liang Ni<sup>b</sup> and Long Chen<sup>\*a</sup>

<sup>a</sup> Antibiotics Research and Re-evaluation Key Laboratory of Sichuan Province, Sichuan Industrial Institute of Antibiotics, School of Pharmacy, Chengdu University, 2025 Chengluo Avenue, Chengdu 610016, P. R. China

<sup>b</sup> College of Chemistry and Materials Science, Sichuan Normal University, 5 Jing An Road, Chengdu 610016, P. R. China

| <b>Table of Contents</b>                                                                                                                                 | <b>Page</b>  |
|----------------------------------------------------------------------------------------------------------------------------------------------------------|--------------|
| <b>1. General information</b>                                                                                                                            | <b>2</b>     |
| <b>2. General procedure for the direct alkynylation of 3-hydroxyisoindolinones with terminal alkynes to 3-alkylated 3,3-disubstituted isoindolinones</b> | <b>3-11</b>  |
| <b>3. Scaled synthesis and product elaboration</b>                                                                                                       | <b>12-16</b> |
| <b>4. Mechanistic study</b>                                                                                                                              | <b>17-19</b> |
| <b>5. <sup>1</sup>H, <sup>13</sup>C and <sup>19</sup>F NMR spectra</b>                                                                                   | <b>20-93</b> |

## 1. General information:

Reactions were monitored by thin layer chromatography using UV light to visualize the reaction course. Purification of reaction products were carried out by flash chromatography on silica gel H. Chemical yields refer to pure isolated substances.  $^1\text{H}$  and  $^{13}\text{C}$  NMR spectra were obtained using a Bruker DPX-600 or DPX-400 spectrometer. The  $^{19}\text{F}$  NMR spectra was recorded at JEOL 565 MHz. HRMS data were collected on a on a Thermo Scientific LTQ Orbitrap Discovery (Bremen, Germany). The linear ion trap (LTQ) part of the hybrid MS system was equipped with electrospray ionization (ESI) probe and operated in both positive and negative ion modes. Chemical shifts are reported in ppm from tetramethylsilane with the solvent resonance as the internal standard. The following abbreviations were used to designate chemical shift multiplicities: s = singlet, d = doublet, t = triplet, q = quartet, h = heptet, m = multiplet, br = broad.

Unless noted, reactions were run under an atmosphere of air. Anhydrous THF, toluene and 1,4-dioxane were prepared by distillation over sodium-benzophenone ketyl prior to use. Anhydrous acetone was distilled over anhydrous  $\text{CaSO}_4$  and stored over MS 4Å. Anhydrous halogenated solvents and  $\text{CH}_3\text{CN}$  were prepared by first distillation over  $\text{P}_2\text{O}_5$  and then from  $\text{CaH}_2$ . Anhydrous ethyl acetate was prepared by first dried in anhydrous  $\text{Na}_2\text{SO}_4$  and then distilled over  $\text{P}_2\text{O}_5$  and stored over MS 4Å. Anhydrous  $\text{CH}_3\text{NO}_2$  was prepared by first dried in anhydrous  $\text{Na}_2\text{SO}_4$  and then distilled under reduced pressure. 3-Hydroxyisoindoliones **1** were prepared according to the literature report.<sup>1</sup>

---

<sup>1</sup> J. Suć, Josipa, I. Dokli and M. Gredičak, *Chem. Commun.*, 2016, **52**, 2071.

## 2. General procedure for the direct alkylation of 3-hydroxyisoindoliones with terminal alkynes to 3-alkylated 3,3-disubstituted isoindolinones

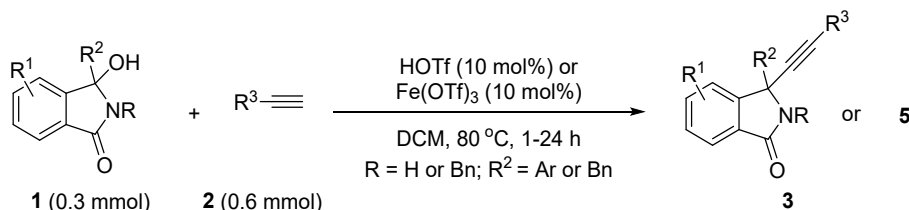

To a 10 mL vial were added 3-hydroxyisoindoliones **1** (0.3 mmol, 1.0 equiv), terminal alkynes **2** (0.6 mmol, 2.0 equivs) and 3.0 mL of anhydrous DCM. After adding HOTf (4.5 mg, 10 mol%) or Fe(OTf)<sub>3</sub> (6.2 mg, 10 mol%), the reaction mixture was stirred at 80 °C till almost full conversion of **1** by TLC analysis. The reaction mixture was directly subjected to column chromatography using petroleum ether/ethyl acetate as the eluent to afford products **3** or **5**. In the following, unless noted, HOTf was used as the catalyst.

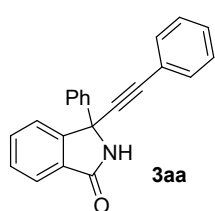

Column chromatography afforded the desired product **3aa** in 84% yield (77.9 mg) as yellow solid; Mp: 168-170 °C; <sup>1</sup>H NMR (600 MHz, CDCl<sub>3</sub>): δ = 7.89-7.88 (m, 1H), 7.63-7.61 (m, 2H), 7.55 (td, *J* = 7.2 Hz, 1.2 Hz, 1H), 7.51-7.47 (m, 3H), 7.39-7.31 (m, 7H), 6.72 (s, 1H); <sup>13</sup>C{<sup>1</sup>H} NMR (150 MHz, CDCl<sub>3</sub>): δ = 169.9, 150.3, 139.7, 133.2, 131.8, 129.2, 128.94, 128.90, 128.88, 128.6, 128.4, 125.9, 124.0, 123.2, 121.9, 86.6, 86.0, 61.9; HRMS (ESI): Exact mass calcd for C<sub>22</sub>H<sub>15</sub>NO [M+H]<sup>+</sup>: 310.1227, Found: 310.1230.

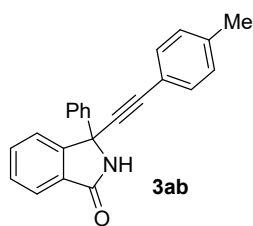

Column chromatography afforded the desired product **3ab** in 42% yield (40.7 mg) or 69% yield (67.2 mg, Fe(OTf)<sub>3</sub> used as the catalyst) as pale yellow solid; Mp: 216-218 °C; <sup>1</sup>H NMR (600 MHz, CDCl<sub>3</sub>): δ = 7.88 (d, *J* = 7.2 Hz, 1H), 7.63-7.61 (m, 2H), 7.55 (t, *J* = 7.2 Hz, 1H), 7.49 (t, *J* = 7.8 Hz, 1H), 7.38-7.35 (m, 5H), 7.34-

7.33 (m, 1H), 7.13 (d, *J* = 7.8 Hz, 2H), 6.57 (s, 1H), 2.36 (s, 3H); <sup>13</sup>C{<sup>1</sup>H} NMR (150 MHz, CDCl<sub>3</sub>): δ = 169.9, 150.4, 139.8, 139.1, 133.1, 131.7, 129.2, 129.1, 128.8, 128.5, 125.9, 124.0, 123.2, 118.8, 86.2, 85.9, 61.9, 21.5; HRMS (ESI): Exact mass calcd for C<sub>23</sub>H<sub>17</sub>NO [M+H]<sup>+</sup>: 324.1383, Found: 324.1385.

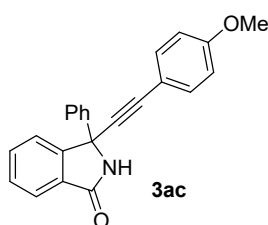

Column chromatography afforded the desired product **3ac** in 56% yield (57.0 mg)

as pale yellow solid; Mp: 172-174 °C; <sup>1</sup>H NMR (600 MHz, CDCl<sub>3</sub>): δ = 7.88 (d, *J* = 7.2 Hz, 1H), 7.62 (d, *J* = 7.2 Hz, 2H), 7.54 (t, *J* = 7.2 Hz, 1H), 7.48 (t, *J* = 6.6 Hz, 1H), 7.40 (d, *J* = 7.8 Hz, 2H), 7.38-7.32 (m, 4H), 6.84 (d, *J* = 7.8 Hz, 2H), 6.72 (s, 1H), 3.81 (s, 3H); <sup>13</sup>C{<sup>1</sup>H} NMR (150 MHz, CDCl<sub>3</sub>): δ = 169.9, 160.0, 150.4, 139.9, 133.3, 133.1, 129.2, 128.8, 128.5, 125.9, 124.0, 123.2, 114.0, 113.9, 86.0, 85.2, 62.0, 55.3; HRMS (ESI): Exact mass calcd for C<sub>23</sub>H<sub>17</sub>NO<sub>2</sub> [M+H]<sup>+</sup>: 340.1333, Found: 340.1333.

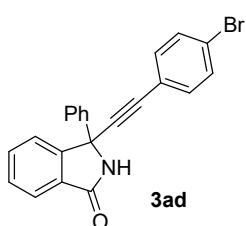

Column chromatography afforded the desired product **3ad** in 74% yield (86.2 mg) as pale yellow solid; Mp: 143-145 °C; <sup>1</sup>H NMR (600 MHz, CDCl<sub>3</sub>): δ = 7.88 (d, *J* = 7.2 Hz, 1H), 7.61-7.58 (m, 2H), 7.56 (td, *J* = 7.2 Hz, 1H), 7.50 (td, *J* = 7.2 Hz, 1H), 7.47-7.45 (m, 2H), 7.38-7.31 (m, 6H), 6.81 (s, 1H); <sup>13</sup>C{<sup>1</sup>H} NMR (150 MHz, CDCl<sub>3</sub>): δ = 169.8, 150.0, 139.4, 133.3, 133.2, 131.7, 129.2, 129.0, 128.9, 128.7, 125.8, 124.1, 123.3, 123.1, 120.8, 87.8, 84.9, 61.9; HRMS (ESI): Exact mass calcd for C<sub>22</sub>H<sub>14</sub>BrNO [M+H]<sup>+</sup>: 388.0332, Found: 388.0329.

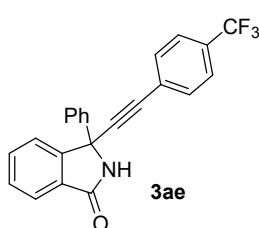

Column chromatography afforded the desired product **3ae** in 59% yield (66.8 mg) as pale yellow solid; Mp: 186-188 °C; <sup>1</sup>H NMR (600 MHz, CDCl<sub>3</sub>): δ = 7.88 (d, *J* = 7.2 Hz, 1H), 7.62-7.61 (m, 2H), 7.58-7.55 (m, 5H), 7.50 (t, *J* = 7.2 Hz, 1H), 7.40-7.33 (m, 4H), 7.23-7.20 (m, 1H); <sup>13</sup>C{<sup>1</sup>H} NMR (150 MHz, CDCl<sub>3</sub>): δ = 170.0, 149.8, 139.3, 133.3, 132.2, 130.7 (q, *J*<sub>C-F</sub> = 33.0 Hz), 129.3, 129.1, 129.0, 128.8, 126.5, 125.8, 125.7, 125.3 (q, *J*<sub>C-F</sub> = 3.0 Hz), 124.7, 124.1, 123.8 (q, *J*<sub>C-F</sub> = 271.5 Hz), 123.1, 89.2, 84.4, 61.9; <sup>19</sup>F{<sup>1</sup>H} NMR (565 MHz, CDCl<sub>3</sub>): δ = -62.9; HRMS (ESI): Exact mass calcd for C<sub>23</sub>H<sub>14</sub>F<sub>3</sub>NO [M+H]<sup>+</sup>: 378.1101, Found: 378.1100.

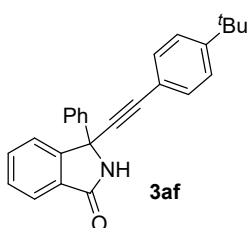

Column chromatography afforded the desired product **3af** in 46% yield (50.4 mg) or 72% yield (79.0 mg, Fe(OTf)<sub>3</sub> used as the catalyst) as pale yellow solid; Mp: 151-153 °C; <sup>1</sup>H NMR (600 MHz, CDCl<sub>3</sub>): δ = 7.88 (d, *J* = 7.8 Hz, 1H), 7.63-7.61 (m, 2H), 7.56-7.53 (m, 1H), 7.50-7.47 (m, 1H), 7.42-7.40 (m, 2H), 7.38-7.37 (m, 1H), 7.36-7.31 (m, 5H), 6.75-6.74 (m, 1H), 1.31 (s, 9H); <sup>13</sup>C{<sup>1</sup>H} NMR (150 MHz, CDCl<sub>3</sub>): δ = 169.8, 152.3, 150.4, 139.8, 133.1, 131.6, 129.2, 128.8, 128.6, 125.9, 125.4, 124.0, 123.2, 118.8, 86.2, 85.9, 61.9, 34.8, 31.1; HRMS (ESI): Exact mass calcd for C<sub>26</sub>H<sub>23</sub>NO [M+H]<sup>+</sup>: 366.1853, Found: 366.1857.



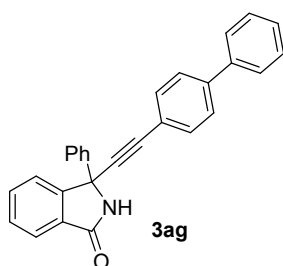

Column chromatography afforded **3ag** in 51% yield (59.0 mg) as pale yellow solid; Mp: 160-162 °C; <sup>1</sup>H NMR (600 MHz, CDCl<sub>3</sub>): δ = 7.90 (d, *J* = 7.2 Hz, 1H), 7.66-7.64 (m, 2H), 7.59-7.57 (m, 3H), 7.56-7.55 (m, 4H), 7.51-7.48 (m, 1H), 7.46-7.44 (m, 2H), 7.41 (d, *J* = 7.8 Hz, 1H), 7.39-7.34 (m, 4H), 7.02 (s, 1H); <sup>13</sup>C{<sup>1</sup>H} NMR (150 MHz, CDCl<sub>3</sub>): δ = 169.9, 150.2, 141.7, 140.1, 139.7, 133.2, 132.3, 129.2, 128.92, 128.89, 128.6, 127.8, 127.0, 125.9, 124.0, 123.2, 120.7, 87.2, 85.9, 61.9; HRMS (ESI): Exact mass calcd for C<sub>28</sub>H<sub>19</sub>NO [M+H]<sup>+</sup>: 386.1540, Found: 386.1542.

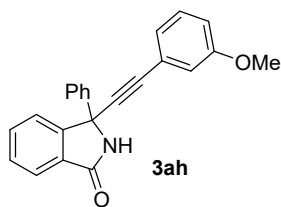

Column chromatography afforded the desired product **3ah** in 64% yield (65.2 mg) as pale yellow solid; Mp: 171-173 °C; <sup>1</sup>H NMR (600 MHz, CDCl<sub>3</sub>): δ = 7.88 (d, *J* = 7.2 Hz, 1H), 7.63-7.61 (m, 2H), 7.55 (td, *J* = 7.2 Hz, 1.2 Hz, 1H), 7.49 (td, *J* = 7.8 Hz, 0.6 Hz, 1H), 7.39-7.33 (m, 4H), 7.23 (t, *J* = 7.8 Hz, 1H), 7.08-7.06 (m, 1H), 6.99-6.98 (m, 1H), 6.94 (s, 1H), 6.91-6.89 (m, 1H), 3.79 (s, 3H); <sup>13</sup>C{<sup>1</sup>H} NMR (150 MHz, CDCl<sub>3</sub>): δ = 169.9, 159.3, 150.2, 139.6, 133.2, 129.5, 129.2, 128.91, 128.88, 128.6, 125.9, 124.4, 124.0, 123.2, 122.9, 116.6, 115.6, 86.4, 85.9, 61.9, 55.3; HRMS (ESI): Exact mass calcd for C<sub>23</sub>H<sub>17</sub>NO<sub>2</sub> [M+H]<sup>+</sup>: 340.1333, Found: 340.1332.

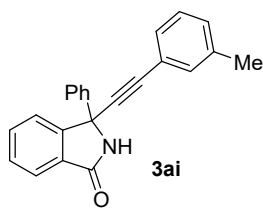

Column chromatography afforded the desired product **3ai** in 73% yield (70.8 mg) as pale yellow solid; Mp: 189-191 °C; <sup>1</sup>H NMR (600 MHz, CDCl<sub>3</sub>): δ = 7.88 (d, *J* = 7.8 Hz, 1H), 7.63 (d, *J* = 7.8 Hz, 2H), 7.54 (t, *J* = 7.2 Hz, 1H), 7.48 (t, *J* = 7.2 Hz, 1H), 7.39-7.27 (m, 6H), 7.21 (t, *J* = 7.2 Hz, 1H), 7.16-7.15 (m, 1H), 6.96 (s, 1H), 2.32 (s, 3H); <sup>13</sup>C{<sup>1</sup>H} NMR (150 MHz, CDCl<sub>3</sub>): δ = 169.9, 150.3, 139.8, 138.1, 133.1, 132.4, 129.8, 129.3, 128.9, 128.8, 128.6, 128.3, 125.9, 124.0, 123.1, 121.7, 86.23, 86.17, 61.9, 21.2; HRMS (ESI): Exact mass calcd for C<sub>23</sub>H<sub>17</sub>NO [M+H]<sup>+</sup>: 324.1383, Found: 324.1383.

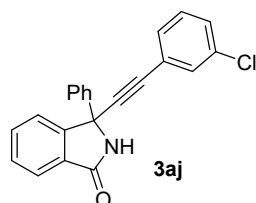

Column chromatography afforded **3aj** in 37% yield (38.2 mg) or 62% yield (63.5 mg, Fe(OTf)<sub>3</sub> used as the catalyst) as pale yellow solid; Mp: 173-175 °C; <sup>1</sup>H NMR (600 MHz, CDCl<sub>3</sub>): δ = 7.88 (d, *J* = 7.8 Hz, 1H), 7.61-7.59 (m, 2H), 7.56 (td, *J* =

7.2 Hz, 1.2 Hz, 1H), 7.51-7.48 (m, 1H), 7.46 (t,  $J = 1.8$  Hz, 1H), 7.38-7.32 (m, 6H), 7.25 (t,  $J = 7.8$  Hz, 1H), 6.97 (s, 1H);  $^{13}\text{C}\{^1\text{H}\}$  NMR (150 MHz,  $\text{CDCl}_3$ ):  $\delta = 170.0, 150.0, 139.4, 133.2, 131.7, 130.0, 129.6, 129.3, 129.2, 129.0, 128.9, 128.7, 125.8, 124.1, 123.6, 123.1, 88.0, 84.4, 61.8$ ; HRMS (ESI): Exact mass calcd for  $\text{C}_{22}\text{H}_{14}\text{ClNO}$   $[\text{M}+\text{H}]^+$ : 344.0837, Found: 344.0839.

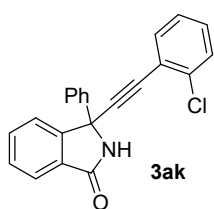

Product **3ak** was obtained in 41% yield (42.3 mg) or 53% yield (54.3 mg,  $\text{Fe}(\text{OTf})_3$  used as the catalyst) as pale yellow solid; Mp: 188-190 °C;  $^1\text{H}$  NMR (600 MHz,  $\text{CDCl}_3$ ):  $\delta = 7.88$  (d,  $J = 7.2$  Hz, 1H), 7.70-7.68 (m, 2H), 7.55 (td,  $J = 7.2$  Hz, 0.6 Hz, 1H), 7.49 (td,  $J = 7.2$  Hz, 0.6 Hz, 1H), 7.46 (dd,  $J = 7.8$  Hz, 1.8 Hz, 1H), 7.41 (d,  $J =$

8.4 Hz, 2H), 7.38-7.35 (m, 2H), 7.34-7.32 (m, 1H), 7.28 (td,  $J = 7.8$  Hz, 1.8 Hz, 1H), 7.20 (td,  $J = 7.2$  Hz, 1.2 Hz, 1H), 6.92 (s, 1H);  $^{13}\text{C}\{^1\text{H}\}$  NMR (150 MHz,  $\text{CDCl}_3$ ):  $\delta = 169.9, 150.1, 139.4, 136.4, 133.4, 133.2, 129.9, 129.3, 129.2, 129.0, 128.9, 128.6, 126.5, 126.0, 124.0, 123.3, 121.9, 91.7, 82.9, 62.0$ ; HRMS (ESI): Exact mass calcd for  $\text{C}_{22}\text{H}_{14}\text{ClNO}$   $[\text{M}+\text{H}]^+$ : 344.0837, Found: 344.0840.

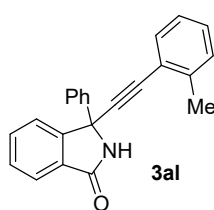

Column chromatography afforded the desired product **3al** in 66% yield (64 mg) as pale yellow solid; Mp: 153-155 °C;  $^1\text{H}$  NMR (600 MHz,  $\text{CDCl}_3$ ):  $\delta = 7.88$  (d,  $J = 7.2$  Hz, 1H), 7.66-7.64 (m, 2H), 7.55 (td,  $J = 7.2$  Hz, 1.2 Hz, 1H), 7.49 (t,  $J = 7.2$  Hz, 1H), 7.43 (d,  $J = 7.2$  Hz, 1H), 7.40 (d,  $J = 7.2$  Hz, 1H), 7.38-7.31 (m, 3H), 7.24 (td,  $J =$

7.2 Hz, 1.2 Hz, 1H), 7.20-7.19 (m, 1H), 7.14 (t,  $J = 7.2$  Hz, 1H), 7.07 (s, 1H), 2.42 (s, 3H);  $^{13}\text{C}\{^1\text{H}\}$  NMR (150 MHz,  $\text{CDCl}_3$ ):  $\delta = 169.9, 150.5, 140.5, 139.8, 133.1, 132.1, 129.5, 129.2, 128.91, 128.86, 128.6, 125.9, 125.6, 124.0, 123.1, 121.7, 90.5, 85.0, 62.1, 20.8$ ; HRMS (ESI): Exact mass calcd for  $\text{C}_{23}\text{H}_{17}\text{NO}$   $[\text{M}+\text{H}]^+$ : 324.1383, Found: 324.1382.

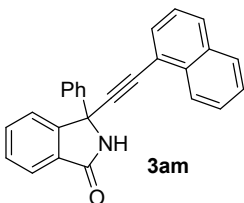

Product **3am** was obtained in 45% yield (48.5 mg) or 62% yield (66.8 mg,  $\text{Fe}(\text{OTf})_3$  used as the catalyst) as pale yellow solid; Mp: 180-182 °C;  $^1\text{H}$  NMR (600 MHz,  $\text{CDCl}_3$ ):  $\delta = 8.20$  (d,  $J = 7.8$  Hz, 1H), 7.93 (d,  $J = 7.8$  Hz, 1H), 7.87-7.85 (m, 2H), 7.73-7.71 (m, 3H), 7.61-7.58 (m, 1H), 7.56-7.54 (m, 2H), 7.53-7.52

(m, 1H), 7.48 (d,  $J = 7.2$  Hz, 1H), 7.44 (t,  $J = 7.8$  Hz, 1H), 7.41-7.39 (m, 2H), 7.37-7.36 (m, 1H), 6.72 (s, 1H);  $^{13}\text{C}\{^1\text{H}\}$  NMR (150 MHz,  $\text{CDCl}_3$ ):  $\delta = 169.9, 150.4, 139.8, 133.32, 133.26, 133.1, 131.0, 129.4, 129.3, 128.99, 128.97, 128.7, 128.4, 127.1, 126.6, 126.0, 125.8, 125.1, 124.1, 123.2, 119.5, 91.4, 84.3,$

62.2; HRMS (ESI): Exact mass calcd for C<sub>26</sub>H<sub>17</sub>NO [M+H]<sup>+</sup>: 360.1383, Found: 360.1386.

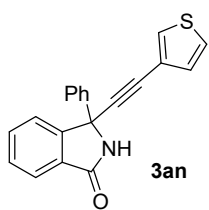

Column chromatography afforded the desired product **3an** in 42% yield (39.7 mg) or 62% yield (58.7 mg, Fe(OTf)<sub>3</sub> used as the catalyst) as pale yellow solid; Mp: 161-163 °C; <sup>1</sup>H NMR (600 MHz, CDCl<sub>3</sub>): δ = 7.87 (d, *J* = 7.8 Hz, 1H), 7.62-7.60 (m, 2H), 7.55 (t, *J* = 7.2 Hz, 1H), 7.50-7.47 (m, 2H), 7.38-7.31 (m, 4H), 7.28-7.27 (m, 1H),

7.13 (d, *J* = 4.8 Hz, 1H), 6.92 (brs, 1H); <sup>13</sup>C{<sup>1</sup>H} NMR (150 MHz, CDCl<sub>3</sub>): δ = 169.8, 150.2, 139.6, 133.2, 129.85, 129.79, 129.2, 128.91, 128.88, 128.6, 125.9, 125.6, 124.0, 123.2, 120.9, 86.2, 81.2, 61.9;

HRMS (ESI): Exact mass calcd for C<sub>20</sub>H<sub>13</sub>NOS [M+H]<sup>+</sup>: 316.0791, Found: 316.0791.

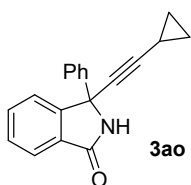

Column chromatography afforded **3ao** in 40% yield (32.8 mg) as pale yellow solid; Mp: 190-192 °C; <sup>1</sup>H NMR (600 MHz, CDCl<sub>3</sub>): δ = 7.83 (d, *J* = 7.8 Hz, 1H), 7.53-7.50 (m, 3H), 7.45 (t, *J* = 7.8 Hz, 1H), 7.33-7.31 (m, 2H), 7.30-7.28 (m, 2H), 6.66 (s, 1H), 1.34-1.31 (m, 1H), 0.82-0.80 (m, 2H), 0.74-0.71 (m, 2H); <sup>13</sup>C{<sup>1</sup>H} NMR (150 MHz, CDCl<sub>3</sub>):

δ = 170.3, 151.1, 140.6, 133.5, 129.6, 129.2, 129.1, 128.8, 126.3, 124.3, 123.5, 90.4, 73.2, 62.0, 8.8, 0.5;

HRMS (ESI): Exact mass calcd for C<sub>19</sub>H<sub>15</sub>NO [M+H]<sup>+</sup>: 274.1227, Found: 274.1228.

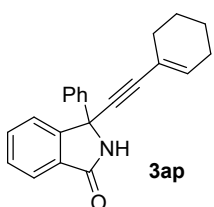

Column chromatography afforded **3ap** in 24% yield (22.6 mg) as pale yellow solid; Mp: 178-180 °C; <sup>1</sup>H NMR (600 MHz, CDCl<sub>3</sub>): δ = 7.85 (d, *J* = 7.2 Hz, 1H), 7.56-7.54 (m, 2H), 7.52 (td, *J* = 7.8 Hz, 1.8 Hz, 1H), 7.48-7.45 (m, 1H), 7.35-7.32 (m, 2H), 7.32-7.30 (m, 2H), 6.46 (s, 1H), 6.20-6.18 (m, 1H), 2.15-2.13 (m, 2H), 2.11-2.08 (m,

2H), 1.65-1.62 (m, 2H), 1.59-1.56 (m, 2H); <sup>13</sup>C{<sup>1</sup>H} NMR (150 MHz, CDCl<sub>3</sub>): δ = 169.8, 150.6, 140.0, 136.5, 133.1, 129.2, 128.8, 128.7, 128.4, 125.9, 123.9, 123.1, 119.7, 87.9, 83.8, 61.9, 29.0, 25.6, 22.1,

21.4; HRMS (ESI): Exact mass calcd for C<sub>22</sub>H<sub>19</sub>NO [M+H]<sup>+</sup>: 314.1540, Found: 314.1544.

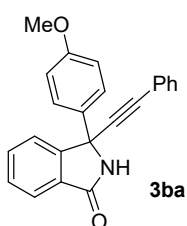

Column chromatography afforded the desired product **3ba** in 52% yield (52.9 mg) as pale yellow solid; Mp: 176-178 °C; <sup>1</sup>H NMR (600 MHz, CDCl<sub>3</sub>): δ = 7.88 (d, *J* = 7.8 Hz, 1H), 7.57-7.54 (m, 1H), 7.53-7.51 (m, 2H), 7.50 (d, *J* = 7.8 Hz, 1H), 7.48-7.46 (m, 2H), 7.37 (d, *J* = 7.8 Hz, 1H), 7.35-7.31 (m, 3H), 6.88-6.87 (m, 2H), 6.56 (s, 1H), 3.80 (s, 3H); <sup>13</sup>C{<sup>1</sup>H} NMR (150 MHz, CDCl<sub>3</sub>): δ = 169.8, 159.8, 150.5, 133.1, 131.8,

131.6, 129.3, 128.9, 128.8, 128.4, 127.3, 123.9, 123.1, 122.0, 114.1, 86.8, 85.8, 61.5, 55.4; HRMS (ESI): Exact mass calcd for C<sub>23</sub>H<sub>17</sub>NO<sub>2</sub> [M+H]<sup>+</sup>: 340.1333, Found: 340.1333.

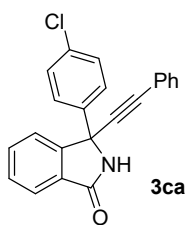

Column chromatography afforded the desired product **3ca** in 69% yield (71.2 mg) as pale yellow solid; Mp: 173-175 °C; <sup>1</sup>H NMR (600 MHz, CDCl<sub>3</sub>): δ = 7.87 (d, *J* = 7.8 Hz, 1H), 7.57-7.55 (m, 3H), 7.49 (t, *J* = 7.8 Hz, 1H), 7.46-7.45 (m, 2H), 7.36-7.34 (m, 2H), 7.33-7.30 (m, 4H), 7.24-7.23 (m, 1H); <sup>13</sup>C{<sup>1</sup>H} NMR (150 MHz, CDCl<sub>3</sub>): δ =

170.0, 149.9, 138.4, 134.6, 133.3, 131.8, 129.2, 129.08, 129.06, 129.0, 128.4, 127.4, 124.1, 123.0, 121.6, 86.3, 86.1, 61.4; HRMS (ESI): Exact mass calcd for C<sub>22</sub>H<sub>14</sub>ClNO [M+H]<sup>+</sup>: 344.0837, Found: 344.0839.

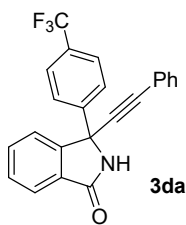

Column chromatography afforded the desired product **3da** in 58% yield (65.7 mg) as pale yellow solid; Mp: 178-180 °C; <sup>1</sup>H NMR (600 MHz, CDCl<sub>3</sub>): δ = 7.89 (d, *J* = 7.8 Hz, 1H), 7.77 (d, *J* = 8.4 Hz, 2H), 7.62 (d, *J* = 8.4 Hz, 2H), 7.57 (td, *J* = 7.2 Hz, 1.2 Hz, 1H), 7.52 (t, *J* = 7.2 Hz, 1H), 7.48-7.46 (m, 2H), 7.38-7.32 (m, 4H), 7.11 (s, 1H);

<sup>13</sup>C{<sup>1</sup>H} NMR (150 MHz, CDCl<sub>3</sub>): δ = 169.9, 149.6, 143.9, 133.4, 131.9, 130.9 (q, *J*<sub>C-F</sub> = 33.0 Hz), 129.3, 129.2, 129.1, 128.5, 126.4, 125.9 (q, *J*<sub>C-F</sub> = 4.5 Hz), 124.8 (q, *J*<sub>C-F</sub> = 271.5 Hz), 124.2, 123.1, 121.5, 86.7, 85.8, 61.5; <sup>19</sup>F{<sup>1</sup>H} NMR (565 MHz, CDCl<sub>3</sub>): δ = -62.6; HRMS (ESI): Exact mass calcd for C<sub>23</sub>H<sub>14</sub>F<sub>3</sub>NO [M+H]<sup>+</sup>: 378.1101, Found: 378.1100.

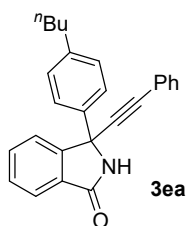

Column chromatography afforded the desired product **3ea** in 59% yield (64.7 mg) as pale yellow solid; Mp: 175-177 °C; <sup>1</sup>H NMR (600 MHz, CDCl<sub>3</sub>): δ = 7.88 (d, *J* = 7.8 Hz, 1H), 7.56-7.54 (m, 1H), 7.52-7.50 (m, 2H), 7.50-7.46 (m, 3H), 7.39 (d, *J* = 7.2 Hz, 1H), 7.35-7.31 (m, 3H), 7.17 (d, *J* = 8.4 Hz, 2H), 6.60 (s, 1H), 2.59 (t, *J* = 7.8 Hz, 2H),

1.60-1.54 (m, 2H), 1.37-1.31 (m, 2H), 0.91 (t, *J* = 7.8 Hz, 3H); <sup>13</sup>C{<sup>1</sup>H} NMR (150 MHz, CDCl<sub>3</sub>): δ = 169.7, 150.4, 143.6, 136.8, 133.1, 131.8, 129.2, 128.9, 128.8, 128.4, 125.8, 124.0, 123.2, 122.0, 86.8, 85.8, 61.7, 35.2, 33.5, 22.3, 13.9; HRMS (ESI): Exact mass calcd for C<sub>26</sub>H<sub>23</sub>NO [M+H]<sup>+</sup>: 366.1853, Found: 366.1859.

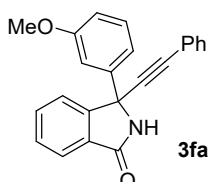

Column chromatography afforded **3fa** in 48% yield (48.9 mg) or 67% yield (67.9 mg, Fe(OTf)<sub>3</sub> used as the catalyst) as pale yellow solid; Mp: 196-198 °C; <sup>1</sup>H NMR (600

MHz, CDCl<sub>3</sub>):  $\delta$  = 7.88 (d,  $J$  = 7.2 Hz, 1H), 7.56-7.54 (m, 1H), 7.49 (t,  $J$  = 7.8 Hz, 1H), 7.47-7.46 (m, 2H), 7.41 (d,  $J$  = 7.8 Hz, 1H), 7.34-7.30 (m, 3H), 7.8 (t,  $J$  = 7.8 Hz, 1H), 7.21-7.19 (m, 2H), 6.89 (s, 1H), 6.86 (dd,  $J$  = 7.8 Hz, 2.4 Hz, 1H), 3.78 (s, 3H); <sup>13</sup>C{<sup>1</sup>H} NMR (150 MHz, CDCl<sub>3</sub>):  $\delta$  = 169.9, 159.9, 150.1, 141.4, 133.1, 131.8, 130.0, 129.2, 128.9, 128.4, 124.0, 123.1, 121.9, 118.2, 113.6, 112.0, 86.6, 85.8, 61.8, 55.3; HRMS (ESI): Exact mass calcd for C<sub>23</sub>H<sub>17</sub>NO<sub>2</sub> [M+H]<sup>+</sup>: 340.1333, Found: 340.1333.

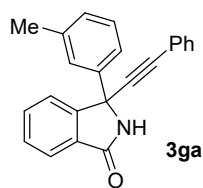

Column chromatography afforded the desired product **3ga** in 70% yield (67.9 mg) as pale yellow solid; Mp: 186-188 °C; <sup>1</sup>H NMR (600 MHz, CDCl<sub>3</sub>):  $\delta$  = 7.88 (d,  $J$  = 7.2

Hz, 1H), 7.56-7.53 (m, 1H), 7.50-7.46 (m, 4H), 7.39 (d,  $J$  = 7.8 Hz, 1H), 7.37 (s, 1H), 7.35-7.30 (m, 3H), 7.27-7.24 (m, 1H), 7.13 (d,  $J$  = 7.8 Hz, 1H), 6.87 (s, 1H), 2.32 (s,

3H); <sup>13</sup>C{<sup>1</sup>H} NMR (150 MHz, CDCl<sub>3</sub>):  $\delta$  = 169.9, 150.3, 139.6, 138.7, 133.1, 131.8, 129.4, 129.2, 128.9, 128.83, 128.75, 128.4, 126.3, 124.0, 123.1, 122.0, 86.8, 85.8, 61.9, 21.5; HRMS (ESI): Exact mass calcd for C<sub>23</sub>H<sub>17</sub>NO [M+H]<sup>+</sup>: 324.1383, Found: 324.1384.

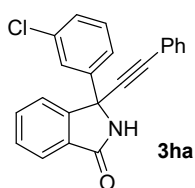

Column chromatography afforded the desired product **3ha** in 58% yield (59.8 mg) as pale yellow solid; Mp: 186-188 °C; <sup>1</sup>H NMR (600 MHz, CDCl<sub>3</sub>):  $\delta$  = 7.88 (d,  $J$  = 7.8

Hz, 1H), 7.633-7.630 (m, 1H), 7.57 (td,  $J$  = 7.2 Hz, 1.2 Hz, 1H), 7.52-7.50 (m, 2H), 7.47 (dd,  $J$  = 7.8 Hz, 1.2 Hz, 2H), 7.38 (d,  $J$  = 7.2 Hz, 1H), 7.36-7.32 (m, 3H), 7.31-

7.28 (m, 2H), 7.10 (s, 1H); <sup>13</sup>C{<sup>1</sup>H} NMR (150 MHz, CDCl<sub>3</sub>):  $\delta$  = 169.9, 149.7, 141.9, 134.8, 133.3, 131.9, 130.2, 129.2, 129.1, 128.8, 128.4, 126.3, 124.2, 123.1, 121.6, 86.4, 85.9, 61.5; HRMS (ESI): Exact mass calcd for C<sub>22</sub>H<sub>14</sub>ClNO [M+H]<sup>+</sup>: 344.0837, Found: 344.0836.

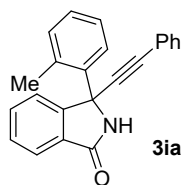

Column chromatography afforded the desired product **3ia** in 55% yield (53.4 mg) as pale yellow solid; Mp: 175-177 °C; <sup>1</sup>H NMR (600 MHz, CDCl<sub>3</sub>):  $\delta$  = 8.03-8.02 (m, 1H),

7.89 (d,  $J$  = 7.2 Hz, 1H), 7.59 (t,  $J$  = 7.2 Hz, 1H), 7.52 (t,  $J$  = 7.2 Hz, 1H), 7.43-7.41 (m, 2H), 7.39 (d,  $J$  = 7.8 Hz, 1H), 7.32-7.25 (m, 5H), 7.12-7.10 (m, 1H), 6.88-6.85 (m, 1H),

2.01 (s, 3H); <sup>13</sup>C{<sup>1</sup>H} NMR (150 MHz, CDCl<sub>3</sub>):  $\delta$  = 169.9, 149.0, 136.7, 135.6, 133.1, 133.0, 131.7, 130.8, 129.00, 128.95, 128.81, 128.79, 128.3, 126.2, 124.0, 123.5, 122.1, 87.9, 86.3, 62.8, 20.3; HRMS (ESI): Exact mass calcd for C<sub>23</sub>H<sub>17</sub>NO [M+H]<sup>+</sup>: 324.1383, Found: 324.1385.

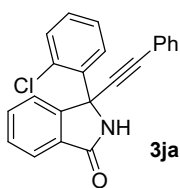

Column chromatography afforded the desired product **3ja** in 46% yield (47.4 mg) as pale yellow solid; Mp: 145-147 °C; <sup>1</sup>H NMR (600 MHz, CDCl<sub>3</sub>): δ = 7.92 (d, *J* = 7.8 Hz, 1H), 7.69-7.65 (m, 2H), 7.61-7.60 (m, 1H), 7.58 (t, *J* = 7.2 Hz, 1H), 7.44-7.41 (m, 3H), 7.32-7.30 (m, 2H), 7.29-7.28 (m, 2H), 7.24 (td, *J* = 7.8 Hz, 0.6 Hz, 1H), 7.07 (s,

1H); <sup>13</sup>C{<sup>1</sup>H} NMR (150 MHz, CDCl<sub>3</sub>): δ = 169.3, 147.4, 135.8, 133.7, 132.7, 132.0, 131.8, 131.2, 130.1, 129.3, 128.89, 128.87, 128.3, 126.9, 124.2, 122.0, 86.7, 85.7, 61.2; HRMS (ESI): Exact mass calcd for C<sub>22</sub>H<sub>14</sub>ClNO [M+H]<sup>+</sup>: 344.0837, Found: 344.0836.

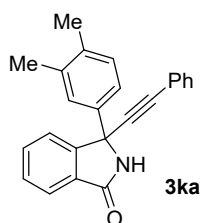

Column chromatography afforded the desired product **3ka** in 58% yield (58.7 mg) as pale yellow solid; Mp: 188-190 °C; <sup>1</sup>H NMR (600 MHz, CDCl<sub>3</sub>): δ = 7.88 (d, *J* = 7.8 Hz, 1H), 7.56-7.53 (m, 1H), 7.50-7.46 (m, 3H), 7.41-7.39 (m, 2H), 7.35-7.30 (m, 4H), 7.13 (d, *J* = 8.4 Hz, 1H), 6.68 (s, 1H), 2.24 (s, 3H), 2.23 (s, 3H); <sup>13</sup>C{<sup>1</sup>H} NMR (150

MHz, CDCl<sub>3</sub>): δ = 169.8, 150.4, 137.25, 137.20, 137.0, 133.1, 131.8, 130.1, 129.2, 128.85, 128.77, 128.4, 126.8, 124.0, 123.4, 123.1, 122.0, 86.9, 85.7, 61.7, 20.0, 19.4; HRMS (ESI): Exact mass calcd for C<sub>24</sub>H<sub>19</sub>NO [M+H]<sup>+</sup>: 338.1540, Found: 338.1541.

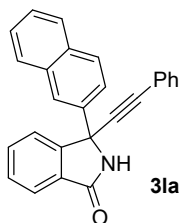

Column chromatography afforded the desired product **3la** in 64% yield (69.0 mg) as pale yellow solid; Mp: 205-207 °C; <sup>1</sup>H NMR (600 MHz, CDCl<sub>3</sub>): δ = 8.31 (d, *J* = 1.8 Hz, 1H), 7.92-7.87 (m, 2H), 7.82-7.78 (m, 2H), 7.54-7.50 (m, 6H), 7.45 (dd, *J* = 8.4 Hz, 1.8 Hz, 1H), 7.41-7.40 (m, 1H), 7.38-7.34 (m, 3H), 7.02 (s, 1H); <sup>13</sup>C{<sup>1</sup>H} NMR

(150 MHz, CDCl<sub>3</sub>): δ = 170.0, 150.2, 136.8, 133.2, 133.1, 133.0, 131.9, 129.4, 129.0, 128.9, 128.4, 128.3, 127.6, 126.7, 126.6, 125.4, 124.1, 123.3, 123.2, 121.9, 86.5, 86.3, 62.0; HRMS (ESI): Exact mass calcd for C<sub>26</sub>H<sub>17</sub>NO [M+H]<sup>+</sup>: 360.1383, Found: 360.1385.

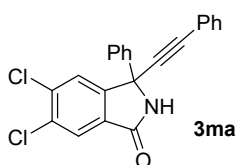

Column chromatography afforded the desired product **3ma** in 52% yield (56.8 mg) as pale yellow solid; Mp: 204-206 °C; <sup>1</sup>H NMR (600 MHz, CDCl<sub>3</sub>): δ = 7.94 (s, 1H), 7.61-7.59 (m, 2H), 7.49-7.47 (m, 2H), 7.45 (s, 1H), 7.41-7.33 (m, 6H), 6.94 (s,

1H); <sup>13</sup>C{<sup>1</sup>H} NMR (150 MHz, CDCl<sub>3</sub>): δ = 167.6, 149.2, 138.5, 137.7, 134.0, 131.9, 129.2, 129.13, 129.10, 129.06, 128.5, 125.9, 125.8, 125.4, 121.4, 86.8, 85.3, 61.5; HRMS (ESI): Exact mass calcd for

C<sub>22</sub>H<sub>13</sub>Cl<sub>2</sub>NO [M+H]<sup>+</sup>: 378.0447, Found: 378.0445.

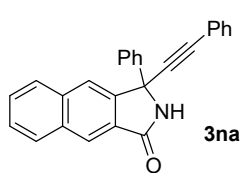

Column chromatography afforded the desired product **3na** in 70% yield (78.5 mg) as pale yellow solid; Mp: 213-215 °C; <sup>1</sup>H NMR (600 MHz, CDCl<sub>3</sub>): δ = 8.43 (s, 1H), 8.03-8.02 (m, 1H), 7.85-7.84 (m, 1H), 7.82 (s, 1H), 7.71-7.70 (m, 2H), 7.58-7.53 (m, 2H), 7.49-7.47 (m, 2H), 7.39-7.37 (m, 2H), 7.35-7.29 (m, 4H), 6.98 (s, 1H); <sup>13</sup>C{<sup>1</sup>H} NMR (150 MHz, CDCl<sub>3</sub>): δ = 169.6, 145.4, 140.6, 136.0, 133.2, 131.9, 129.7, 128.94, 128.91, 128.6, 128.44, 128.39, 128.1, 127.3, 126.8, 126.0, 124.8, 122.5, 121.9, 87.3, 86.1, 61.8; HRMS (ESI): Exact mass calcd for C<sub>26</sub>H<sub>17</sub>NO [M+H]<sup>+</sup>: 360.1383, Found: 360.1377.

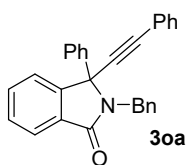

Column chromatography afforded the desired product **3oa** in 36% yield (43.4 mg) as pale yellow solid; Mp: 109-111 °C; <sup>1</sup>H NMR (600 MHz, CDCl<sub>3</sub>): δ = 7.95-7.94 (m, 1H), 7.52-7.47 (m, 2H), 7.39-7.38 (m, 2H), 7.31-7.28 (m, 4H), 7.27-7.23 (m, 5H), 7.17-7.10 (m, 5H), 4.97 (d, *J* = 15.0 Hz, 1H), 4.29 (d, *J* = 15.6 Hz, 1H); <sup>13</sup>C{<sup>1</sup>H} NMR (150 MHz, CDCl<sub>3</sub>): δ = 168.4, 149.4, 138.0, 137.5, 132.8, 131.8, 130.1, 128.9, 128.85, 128.78, 128.7, 128.6, 128.2, 128.1, 127.0, 123.9, 123.0, 121.9, 88.6, 85.3, 66.8, 44.5; HRMS (ESI): Exact mass calcd for C<sub>29</sub>H<sub>21</sub>NO [M+H]<sup>+</sup>: 400.1696, Found: 400.1691.

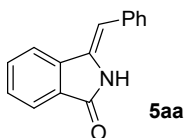

Column chromatography afforded the desired product **5aa**<sup>2</sup> in 87% yield (58.0 mg) as pale yellow-green solid; Mp: 177-179 °C; <sup>1</sup>H NMR (600 MHz, CDCl<sub>3</sub>): δ = 8.37 (s, 1H), 7.88 (d, *J* = 7.8 Hz, 1H), 7.79 (d, *J* = 7.8 Hz, 1H), 7.64 (t, *J* = 7.8 Hz, 1H), 7.52 (t, *J* = 7.8 Hz, 1H), 7.47-7.43 (m, 4H), 7.33-7.30 (m, 1H), 6.56 (s, 1H); <sup>13</sup>C{<sup>1</sup>H} NMR (150 MHz, CDCl<sub>3</sub>): δ = 169.1, 138.3, 135.1, 133.2, 132.4, 129.3, 128.8, 128.6, 127.8, 123.7, 119.9, 106.0.

### 3. Scaled synthesis and product elaboration

#### 3.1 Scaled synthesis

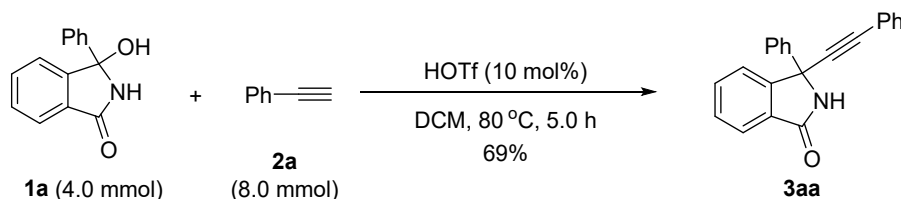

<sup>2</sup> M. Hellal and G. D. Cuny, *Tetrahedron Lett.*, 2011, **52**, 5508.

To a 100 mL of sealed tube were added **1a** (0.90 g, 4.0 mmol, 1.0 equiv), phenylacetylene **2a** (0.82 g, 8.0 mmol, 2.0 equivs) and 30.0 mL of CH<sub>2</sub>Cl<sub>2</sub>. After adding HOTf (100 mg, 10 mol%), the reaction mixture was stirred at 80 °C till almost full conversion of **1a** by TLC analysis. The residue was directly subjected to column chromatography using petroleum ether/ethyl acetate (10:1, v:v) as the eluent to afford the desired product **3aa** in 69% yield (0.86 g).

### 3.2 Product elaboration

#### 1) Synthesis of 3oa

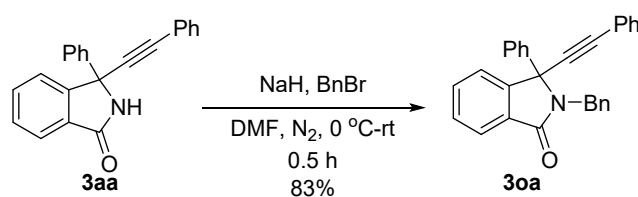

Under the N<sub>2</sub> atmosphere, to a 25 mL dried Schlenk tube were sequentially added **3aa** (92.8 mg, 0.3 mmol) and 3.0 mL of anhydrous DMF. After cooling to 0 °C, NaH (0.02 g, 0.45 mmol, 1.5 equivs) was added portion wise into the reaction mixture. The resulting solution was stirred at the same temperature till there was no obvious gas generating. Then, BnBr (43 μL, 0.36 mmol) was added in the tube. Upon the completion of the reaction (monitored by TLC), the reaction mixture was quenched with H<sub>2</sub>O and extracted with ethyl acetate (4×15 mL). The combined organic layers were then washed with H<sub>2</sub>O, dried over anhydrous Na<sub>2</sub>SO<sub>4</sub>. After removing the solvent, the residue was then subjected to column chromatography using petroleum ether/ethyl acetate (generally 5:1, v:v) as the eluent to afford the desired product **3oa** in 83% yield (99.6 mg) as colorless oil.

#### 2) Synthesis of 6

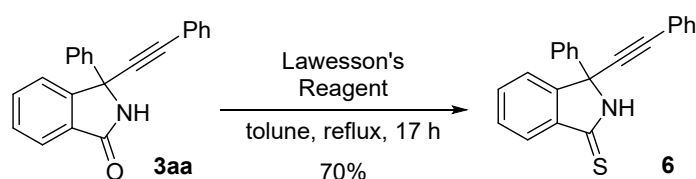

To a 25 mL of sealed tube were sequentially added **3aa** (61.8 mg, 0.2 mmol), Lawesson's reagent



(80.9 mg, 0.2 mmol) and 3.0 mL of toluene. The reaction mixture was then refluxed for 17 h till almost full conversion of **3aa** by TLC analysis. Then, the reaction mixture was quenched with water and extracted with ethyl acetate (3× 15 mL). The organic layer was dried over Na<sub>2</sub>SO<sub>4</sub> and concentrated under reduced pressure. The crude product was purified over silica gel by column chromatography to afford compound **6** in 70% yield (45.1 mg) as pale yellow solid; Mp: 141-143 °C; <sup>1</sup>H NMR (600 MHz, CDCl<sub>3</sub>): δ = 8.47 (brs, 1H), 8.07 (d, *J* = 7.2 Hz, 1H), 7.58 (td, *J* = 7.2 Hz, 1.2 Hz, 1H), 7.55-7.51 (m, 3H), 7.49-7.47 (m, 2H), 7.38-7.31 (m, 7H); <sup>13</sup>C{<sup>1</sup>H} NMR (150 MHz, CDCl<sub>3</sub>): δ = 195.4, 148.4, 137.9, 136.0, 133.1, 131.9, 129.2, 129.1, 129.05, 129.02, 128.4, 125.9, 125.8, 122.5, 121.6, 87.4, 84.1, 68.7; HRMS (ESI): Exact mass calcd for C<sub>22</sub>H<sub>15</sub>NS [M+H]<sup>+</sup>: 326.0998, Found: 326.1000.

### 3) Synthesis of 7

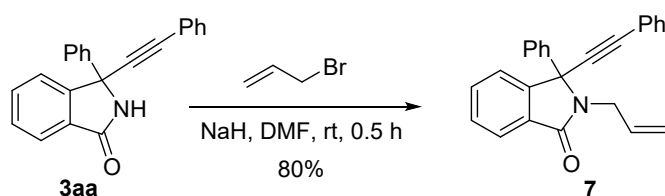

Under the N<sub>2</sub> atmosphere, to a 25 mL dried Schlenk tube were sequentially added **3aa** (0.31 g, 1.0 mmol) and 5.0 mL of anhydrous DMF. After cooling to 0 °C, NaH (0.06 g, 1.5 mmol, 1.5 equivs) was added portion wise. The resulting solution was stirred at the same temperature till there was no obvious gas generating. Then, allyl bromide (101 μL, 1.2 mmol) was added. Upon the completion of the reaction (monitored by TLC), the reaction mixture was quenched with H<sub>2</sub>O and extracted with ethyl acetate (4×15 mL). The combined organic layers were then washed with H<sub>2</sub>O, dried over anhydrous Na<sub>2</sub>SO<sub>4</sub>. After removing the solvent, the residue was then subjected to column chromatography using petroleum ether/ethyl acetate (generally 5:1, v:v) as the eluent to afford the desired product **7** in 80% yield (277.4 mg) as white solid; Mp: 91-93 °C; <sup>1</sup>H NMR (600 MHz, CDCl<sub>3</sub>): δ = 7.91 (d, *J* = 7.2 Hz, 1H), 7.52 (t, *J* = 7.2 Hz, 1H), 7.50-7.46 (m, 5H), 7.36-7.32 (m, 7H), 5.85-5.79 (m, 1H), 5.16 (dd, *J* = 16.8 Hz, 1.2 Hz, 1H), 5.03-5.01 (m, 1H), 4.29 (dd, *J* = 15.6 Hz, 6.0 Hz, 1H), 3.90 (dd, *J* = 15.6 Hz, 6.6 Hz, 1H); <sup>13</sup>C{<sup>1</sup>H} NMR (150 MHz, CDCl<sub>3</sub>): δ = 168.0, 149.2, 138.3, 133.3, 132.7, 131.8, 130.3, 129.0, 128.9, 128.8, 128.7, 128.5, 126.9, 123.8, 123.0, 122.1, 117.3, 88.0, 85.6, 66.7, 43.7; HRMS (ESI): Exact mass calcd for C<sub>25</sub>H<sub>19</sub>NO [M+H]<sup>+</sup>: 350.1539, Found: 350.1541.

### 4) Synthesis of 8

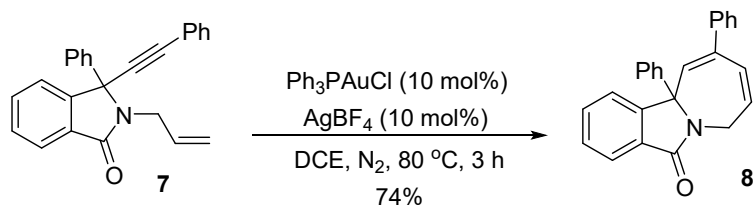

Under the  $\text{N}_2$  atmosphere, to a 25 mL dried Schlenk tube were sequentially added **6** (34.9 mg, 0.1 mmol),  $\text{Ph}_3\text{PAuCl}$  (5.0 mg, 0.01 mmol),  $\text{AgBF}_4$  (2.0 mg, 0.01 mmol) and 1.0 mL of anhydrous DCE. Then the reaction mixture was stirred at 80 °C till almost full conversion of **6** by TLC analysis. The reaction mixture was directly subjected to column chromatography using petroleum ether/ethyl acetate (generally 8:1, v:v) as the eluent to afford the desired product **8** in 74% yield (25.8 mg) as white solid; Mp: 231-233 °C;  $^1\text{H}$  NMR (600 MHz,  $\text{CDCl}_3$ ):  $\delta$  = 7.94 (d,  $J$  = 7.2 Hz, 1H), 7.50-7.48 (m, 1H), 7.47-7.44 (m, 1H), 7.43-7.42 (m, 2H), 7.38-7.35 (m, 4H), 7.34-7.32 (m, 3H), 7.32-7.29 (m, 2H), 5.74 (s, 1H), 5.52 (s, 1H), 5.24 (s, 1H), 4.99 (dd,  $J$  = 19.8 Hz, 4.2 Hz, 1H), 3.83 (dd,  $J$  = 19.8 Hz, 2.4 Hz, 1H);  $^{13}\text{C}\{^1\text{H}\}$  NMR (150 MHz,  $\text{CDCl}_3$ ):  $\delta$  = 167.3, 148.3, 141.8, 140.1, 138.9, 138.4, 131.5, 130.8, 129.2, 128.9, 128.4, 128.2, 127.8, 125.6, 124.85, 124.76, 124.3, 116.5, 69.7, 39.0; HRMS (ESI): Exact mass calcd for  $\text{C}_{25}\text{H}_{19}\text{NO}$   $[\text{M}+\text{H}]^+$ : 350.1539, Found: 350.1538.

## 5) Synthesis of 9

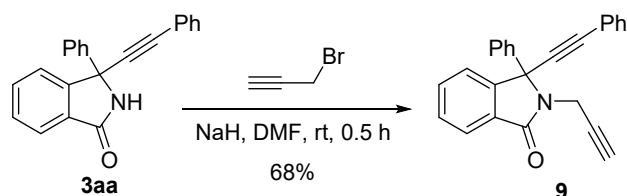

Under the  $\text{N}_2$  atmosphere, to a 25 mL dried Schlenk tube were sequentially added **3aa** (0.31 g, 1.0 mmol) and 5.0 mL of anhydrous DMF. After cooling to 0 °C, NaH (0.06 g, 1.5 mmol, 1.5 equivs) was added portion wise. The resulting solution was stirred at the same temperature till there was no obvious gas generating. Then, propargyl bromide (103  $\mu\text{L}$ , 1.2 mmol) was added. Upon the completion of the reaction (monitored by TLC), the reaction mixture was quenched with  $\text{H}_2\text{O}$  and extracted with ethyl acetate ( $4 \times 15$  mL). The combined organic layers were then washed with  $\text{H}_2\text{O}$ , dried over anhydrous  $\text{Na}_2\text{SO}_4$ . After removing the solvent, the residue was then subjected to column chromatography using petroleum ether/ethyl acetate (generally 5:1, v:v) as the eluent to afford product **9** in 68% yield (236.9 mg) as pale yellow solid; Mp: 140-143 °C;  $^1\text{H}$  NMR (600 MHz,  $\text{CDCl}_3$ ):  $\delta$  = 7.93 (d,  $J$  = 7.2 Hz, 1H), 7.55-7.53 (m, 1H), 7.52-7.48 (m, 5H), 7.37-7.32 (m, 7H), 4.41 (dd,  $J$  = 17.4 Hz, 2.4 Hz, 1H), 4.15 (dd,  $J$  = 17.4 Hz, 2.4 Hz, 1H), 2.00 (t,  $J$  = 2.4 Hz, 1H);  $^{13}\text{C}\{^1\text{H}\}$  NMR (150 MHz,  $\text{CDCl}_3$ ):  $\delta$  = 167.6, 149.2, 137.7, 133.1, 131.9, 129.6, 129.1, 129.0, 128.9, 128.8, 128.5, 127.0, 124.0, 123.1, 122.0, 88.4, 84.7, 78.4, 71.2, 66.6, 29.5; HRMS (ESI): Exact mass calcd for  $\text{C}_{25}\text{H}_{17}\text{NO}$   $[\text{M}+\text{H}]^+$ : 348.1383, Found: 348.1384.

## 6) Synthesis of 10

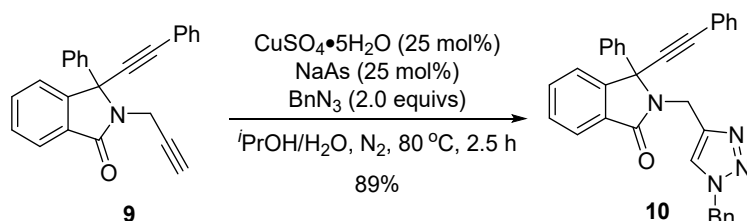

Under  $\text{N}_2$  atmosphere, to a 25 mL dried Schlenk tube were sequentially added **9** (69.5 mg, 0.2 mmol),  $\text{CuSO}_4 \cdot 5\text{H}_2\text{O}$  (12.5 mg, 0.05 mmol, 0.25 equiv), sodium ascorbate (9.9 mg, 0.05 mmol, 0.25 equiv), and  $\text{H}_2\text{O}$  (2.0 mL) and  $i\text{PrOH}$  (2.0 mL). After adding  $\text{BnN}_3$  (53.3 mg, 0.4 mmol, 2.0 equivs), the mixture was stirred at 80 °C till almost full conversion of **9** by TLC analysis. Then, the reaction is terminated by the addition of 20.0 mL saturated aqueous  $\text{NH}_4\text{Cl}$ . The organic layer was extracted with

ethyl acetate (3×15 mL) and then dried with Na<sub>2</sub>SO<sub>4</sub>. After removing the solvent, the residue was then subjected to column chromatography using petroleum ether/ethyl acetate (generally 4:1, v:v) as the eluent to afford the desired product **10** in 89% yield (85.5 mg) as sticky pale yellow oil; Mp: 131-133 °C; <sup>1</sup>H NMR (600 MHz, CDCl<sub>3</sub>): δ = 7.93 (d, *J* = 7.8 Hz, 1H), 7.57-7.51 (m, 2H), 7.40-7.33 (m, 9H), 7.32-7.27 (m, 4H), 7.26-7.24 (m, 2H), 7.10 (d, *J* = 7.2 Hz, 2H), 5.33 (d, *J* = 8.4 Hz, 1H), 5.28-5.26 (m, 1H), 4.98 (d, *J* = 16.2 Hz, 1H), 4.65 (d, *J* = 16.2 Hz, 1H); <sup>13</sup>C{<sup>1</sup>H} NMR (150 MHz, CDCl<sub>3</sub>): δ = 168.1, 149.2, 144.8, 137.6, 134.6, 133.0, 131.9, 129.9, 129.03, 128.96, 128.8, 128.6, 128.4, 128.1, 126.9, 123.8, 123.2, 122.9, 121.7, 88.4, 84.9, 66.7, 54.0, 36.3; HRMS (ESI): Exact mass calcd for C<sub>32</sub>H<sub>24</sub>N<sub>4</sub>O [M+H]<sup>+</sup>: 481.2023, Found: 481.2028.

## 4. Mechanistic study

To explore the reaction mechanism, we have tried to detect the possible intermediates during the reaction course by MS. To a 10-mL vial were added 3-hydroxyisoindoliones **1** (0.3 mmol, 1.0 equiv), terminal alkynes **2** (0.6 mmol, 2.0 equivs) and 3.0 mL of anhydrous DCM. After adding HOTf (4.5 mg, 10 mol%), the reaction mixture was stirred at 80 °C for about 0.5 h. After the HOTf was removed by extraction, the sample was sent to mass spectrometry for detection.

We believe that the process of formation of intermediate **A** from **1a** and HOTf is reversible, so we did not find directly the possible peak signal of intermediate **A** from the mass spectrum. However, we successfully found the presence of intermediate **B** from the results of mass spectrometry, which can prove that the reaction proceeded *via* the formation of intermediate **B**.

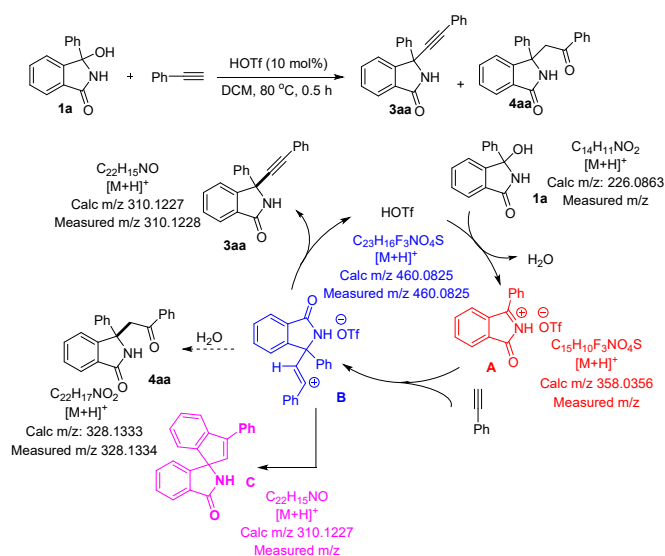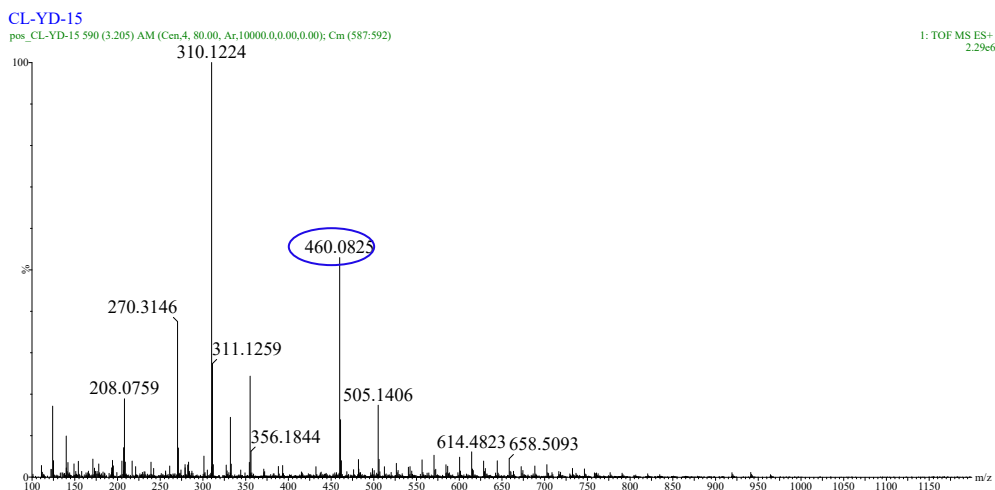

CL-YD-15

pos\_CL-YD-15 590 (3.205) AM (Cen,4, 80.00, Ar,10000.0,0.00,0.00); Cm (587:592)

I: TOF MS ES+  
1.21e6

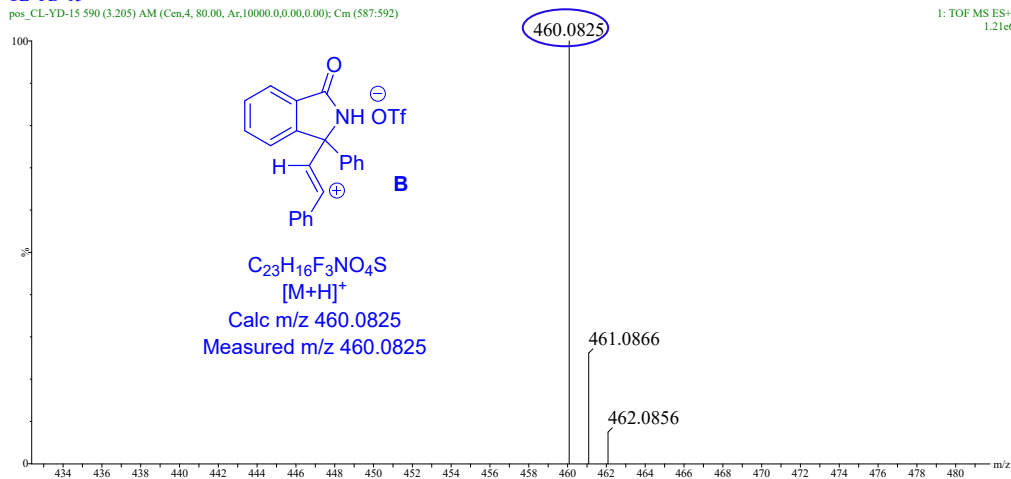

CL-YD-15

pos\_CL-YD-15 576 (3.131) AM (Cen,4, 80.00, Ar,10000.0,0.00,0.00)

I: TOF MS ES+  
9.15e6

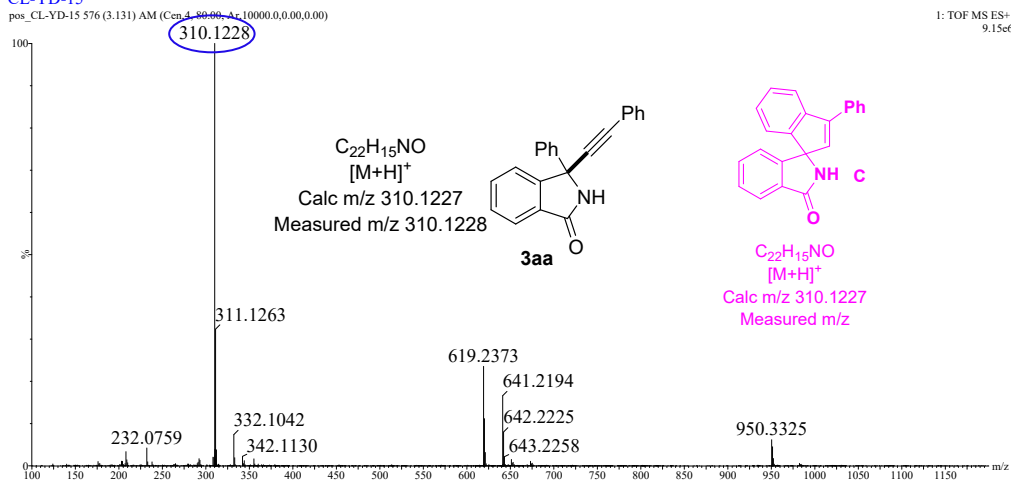

CL-YD-15

pos\_CL-YD-15 576 (3.131) AM (Cen,4, 80.00, Ar,10000.0,0.00,0.00)

I: TOF MS ES+  
9.15e6

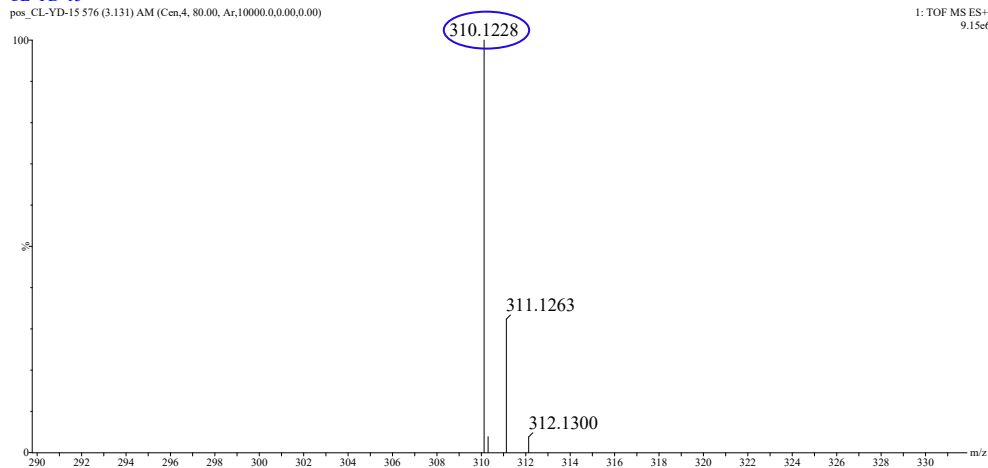

CL-YD-15

pos\_CL-YD-15 509 (2.767) AM (Cen,4, 80.00, Ar,10000.0,0.00,0.00)

1: TOF MS ES+  
2.77e6

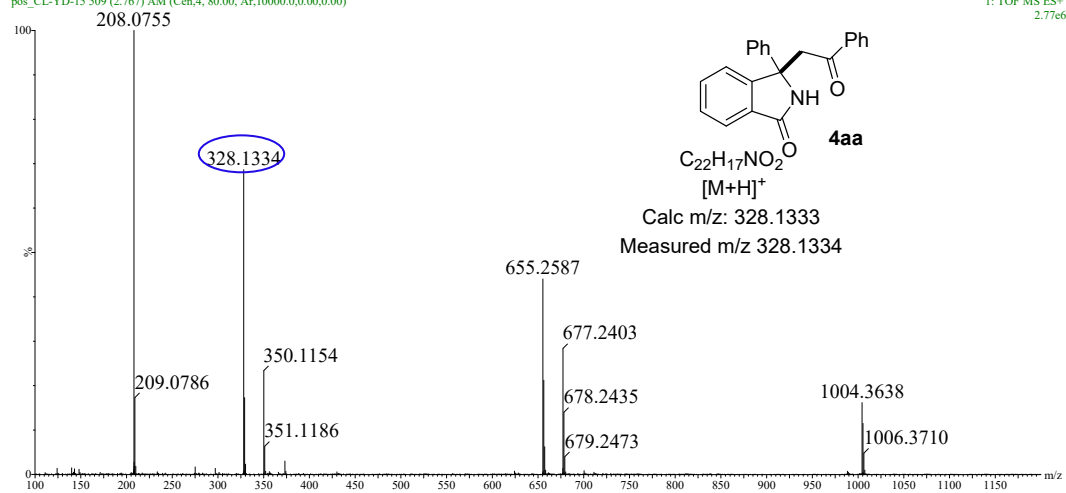

CL-YD-15

pos\_CL-YD-15 509 (2.767) AM (Cen,4, 80.00, Ar,10000.0,0.00,0.00)

1: TOF MS ES+  
1.90e6

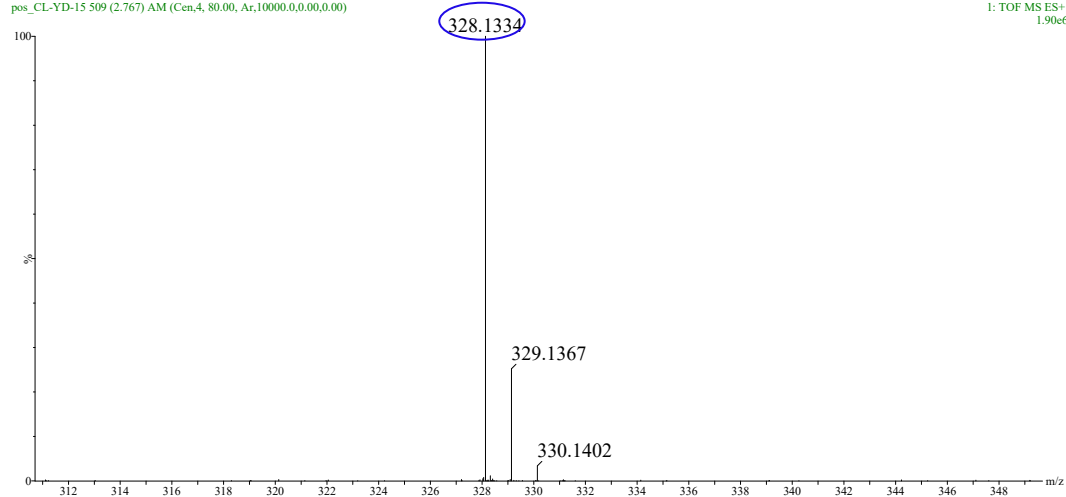

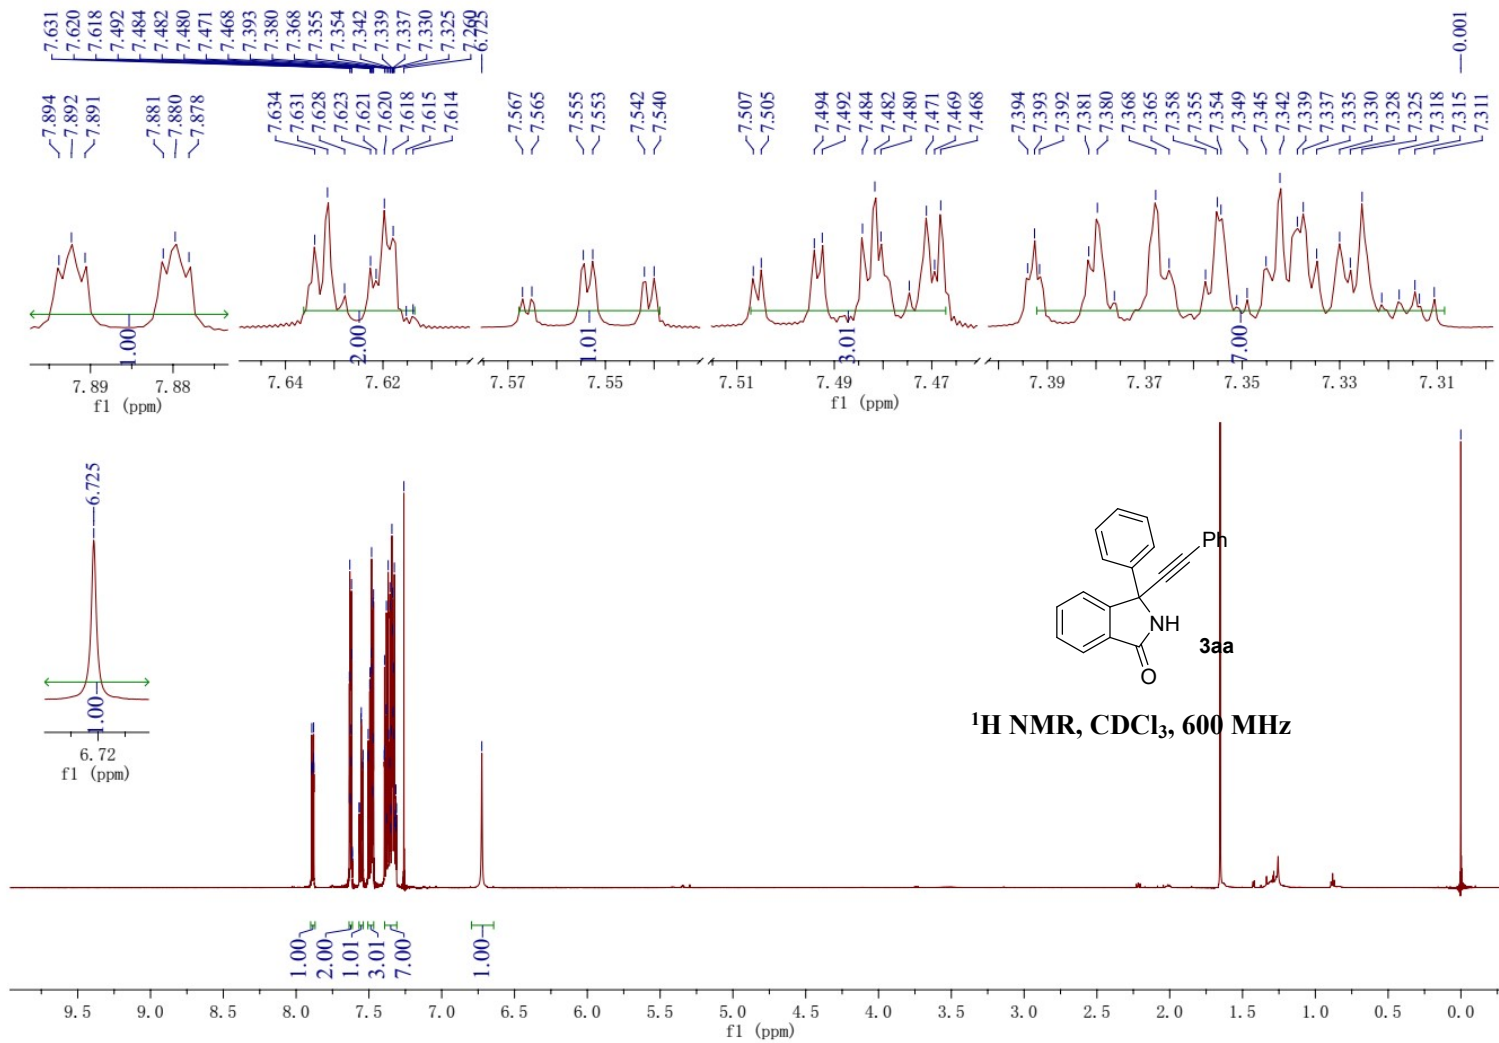



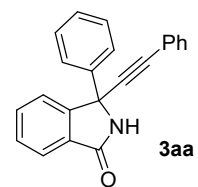

**$^{13}\text{C}$  NMR,  $\text{CDCl}_3$ , 150 MHz**

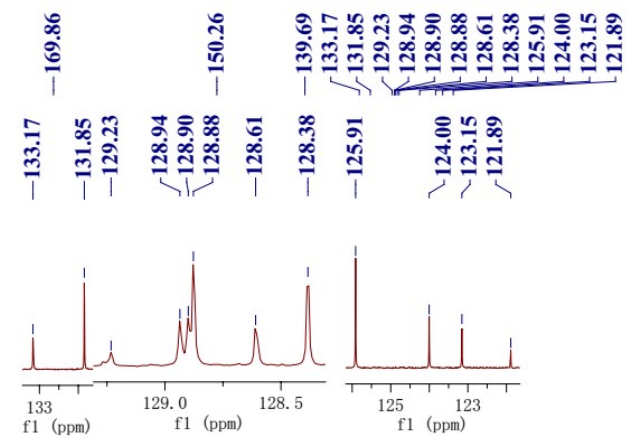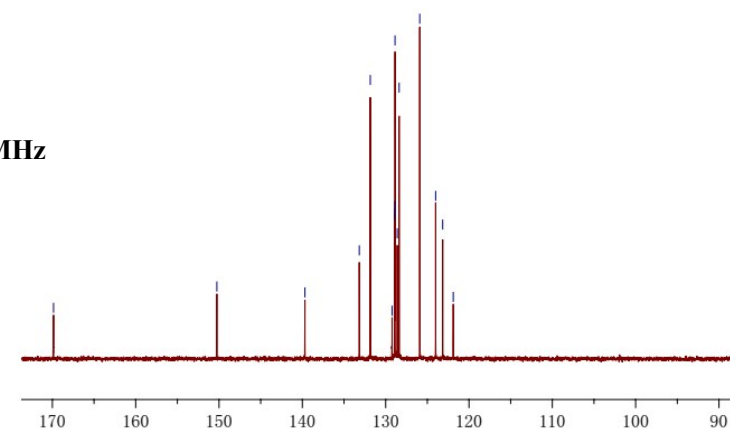

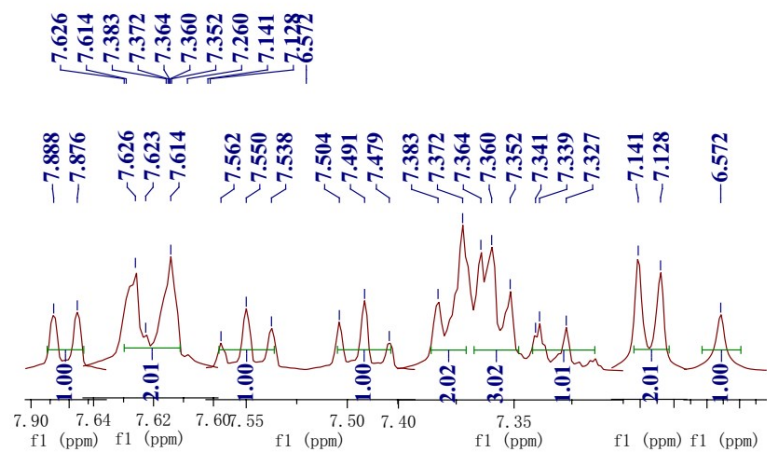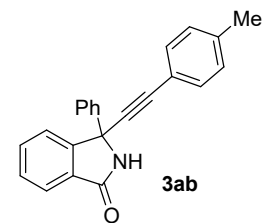

<sup>1</sup>H NMR, CDCl<sub>3</sub>, 600 MHz

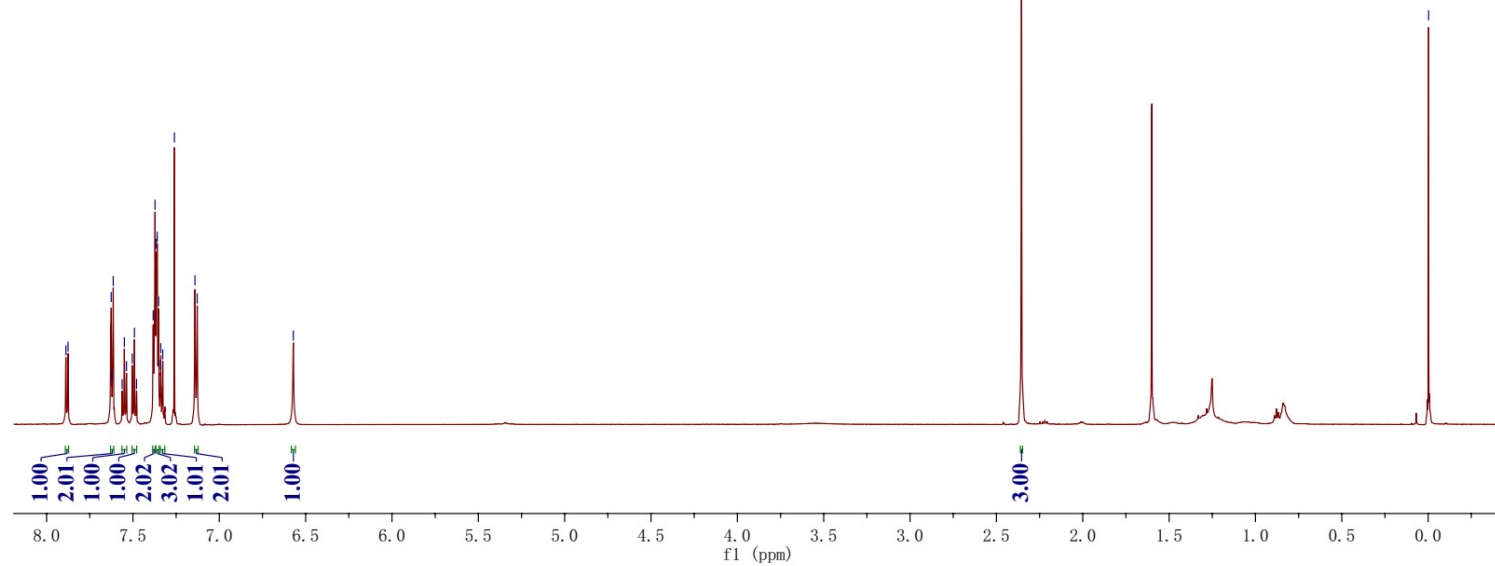

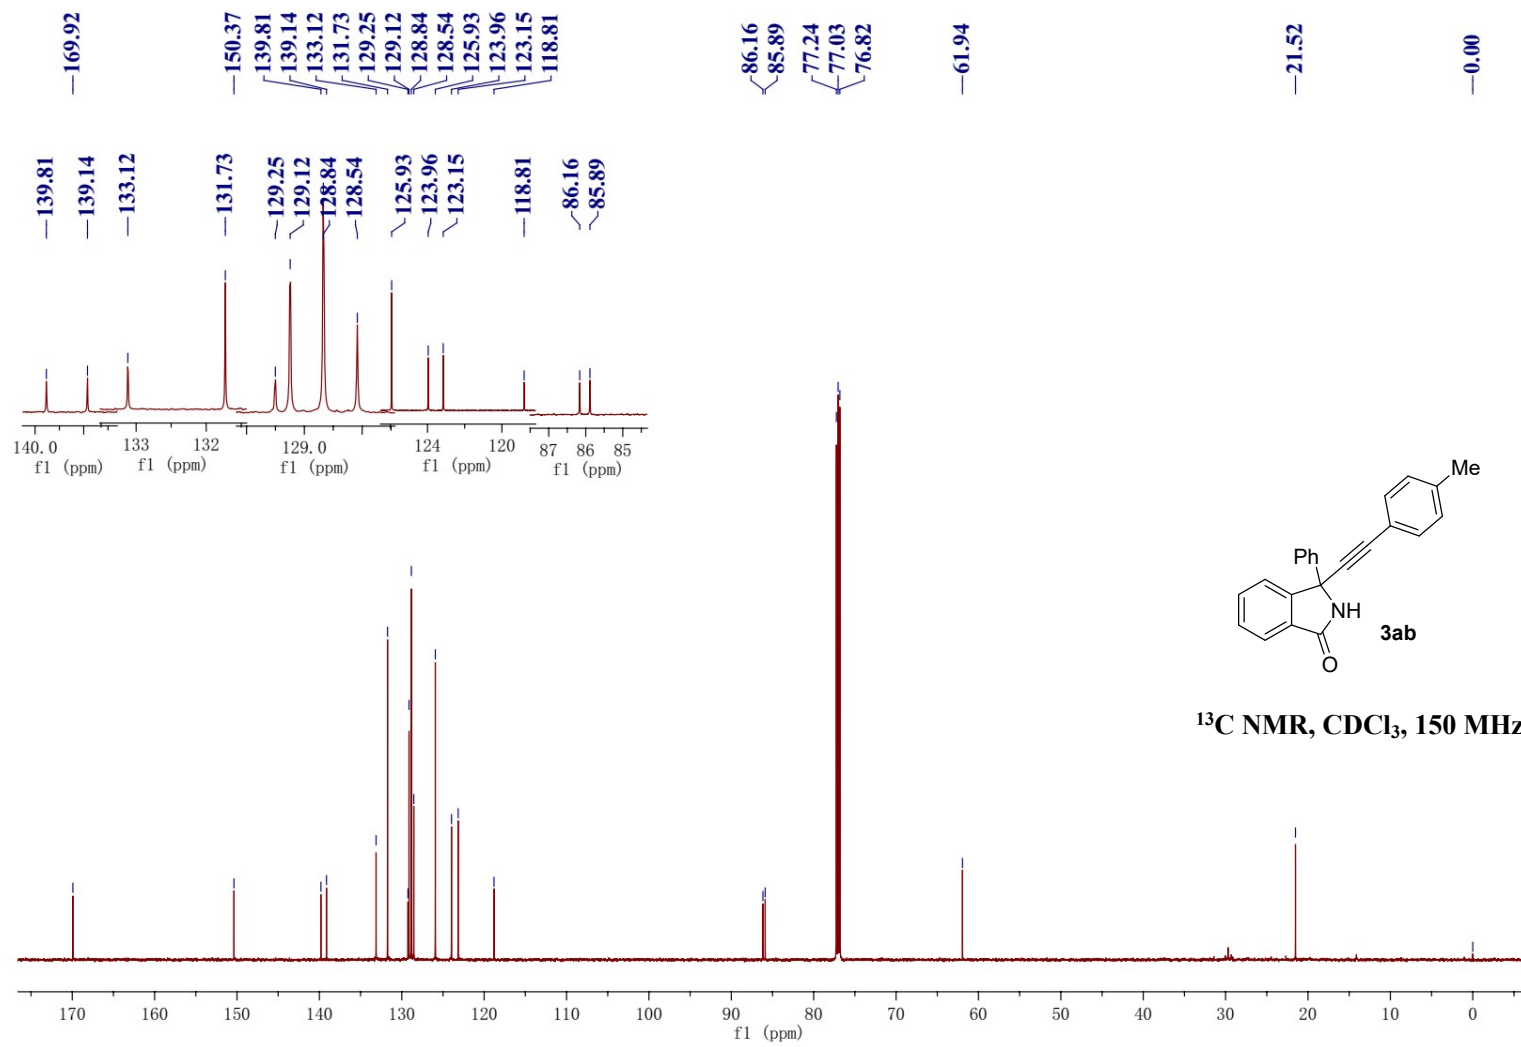

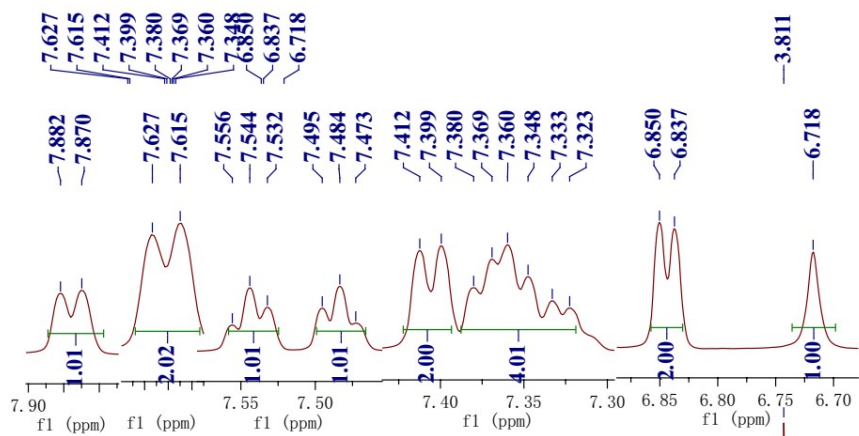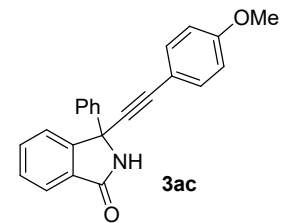

<sup>1</sup>H NMR, CDCl<sub>3</sub>, 600 MHz

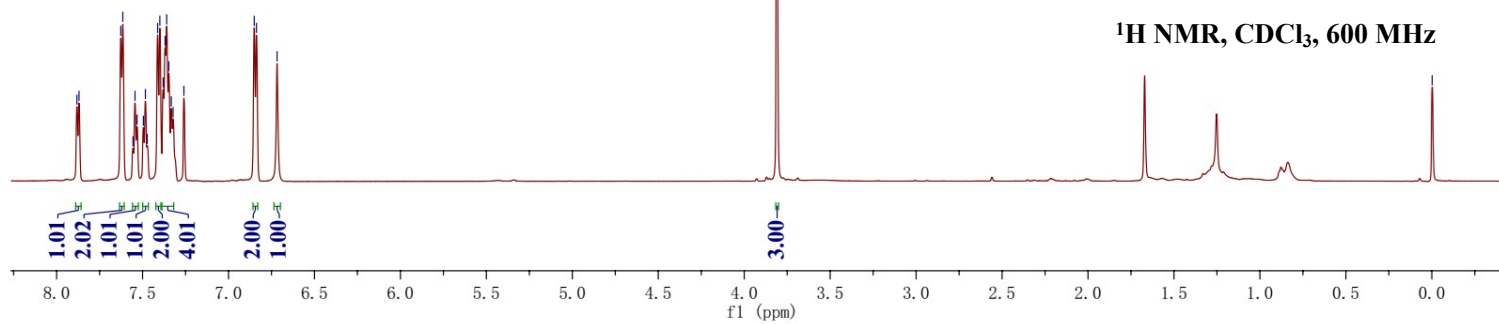

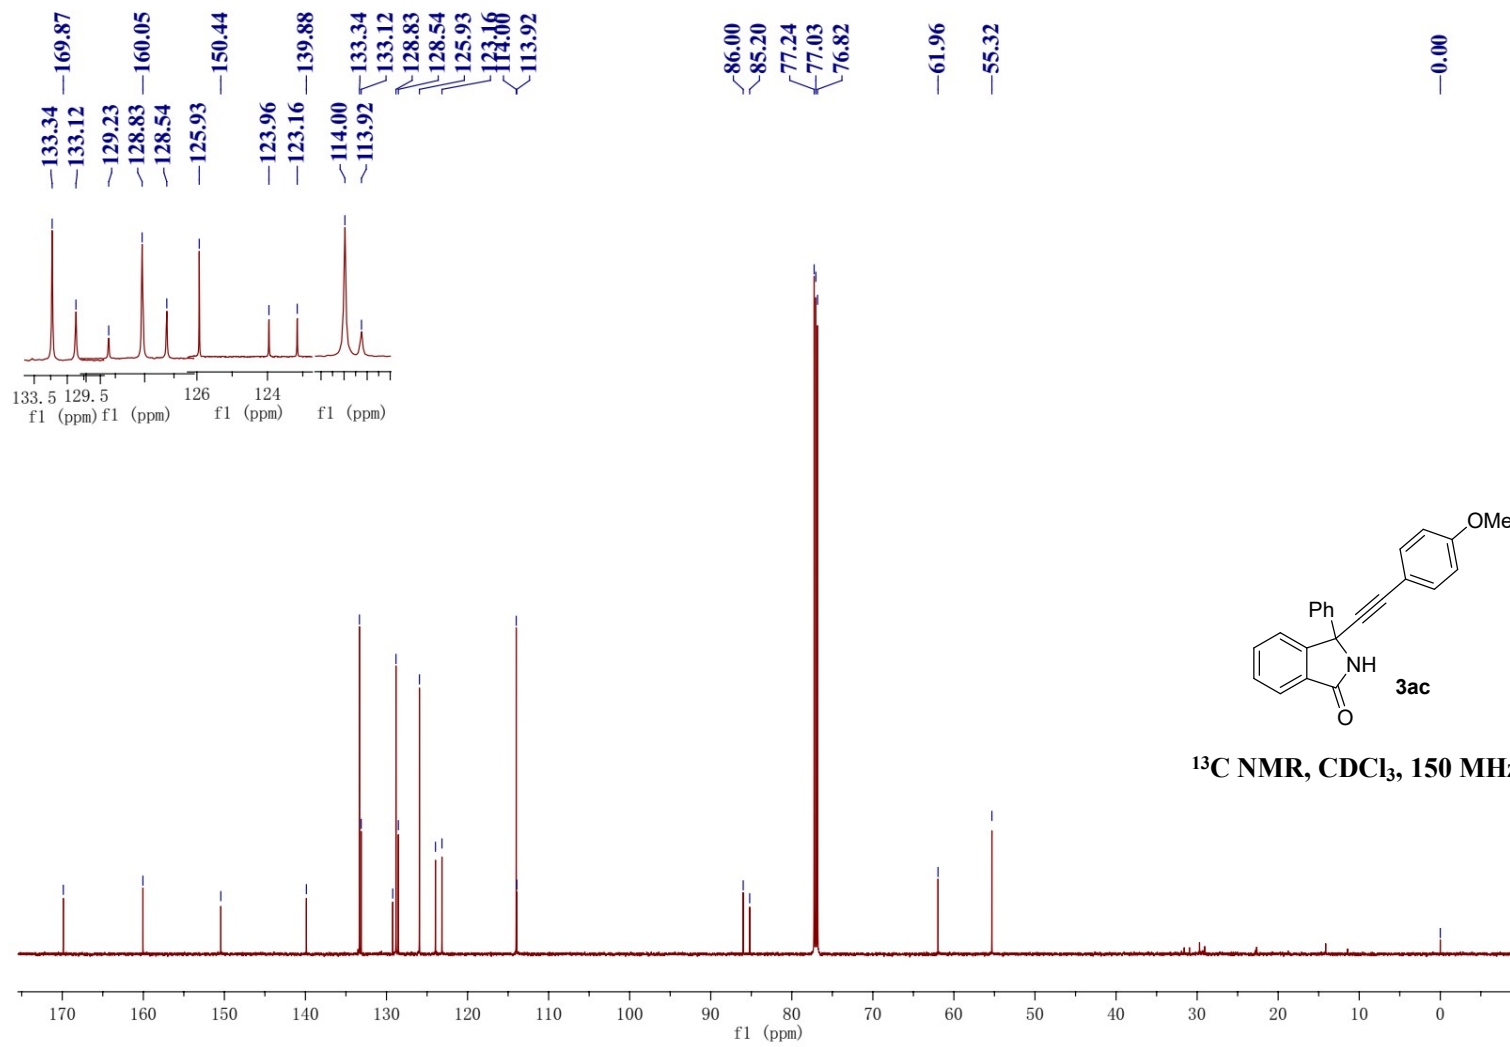

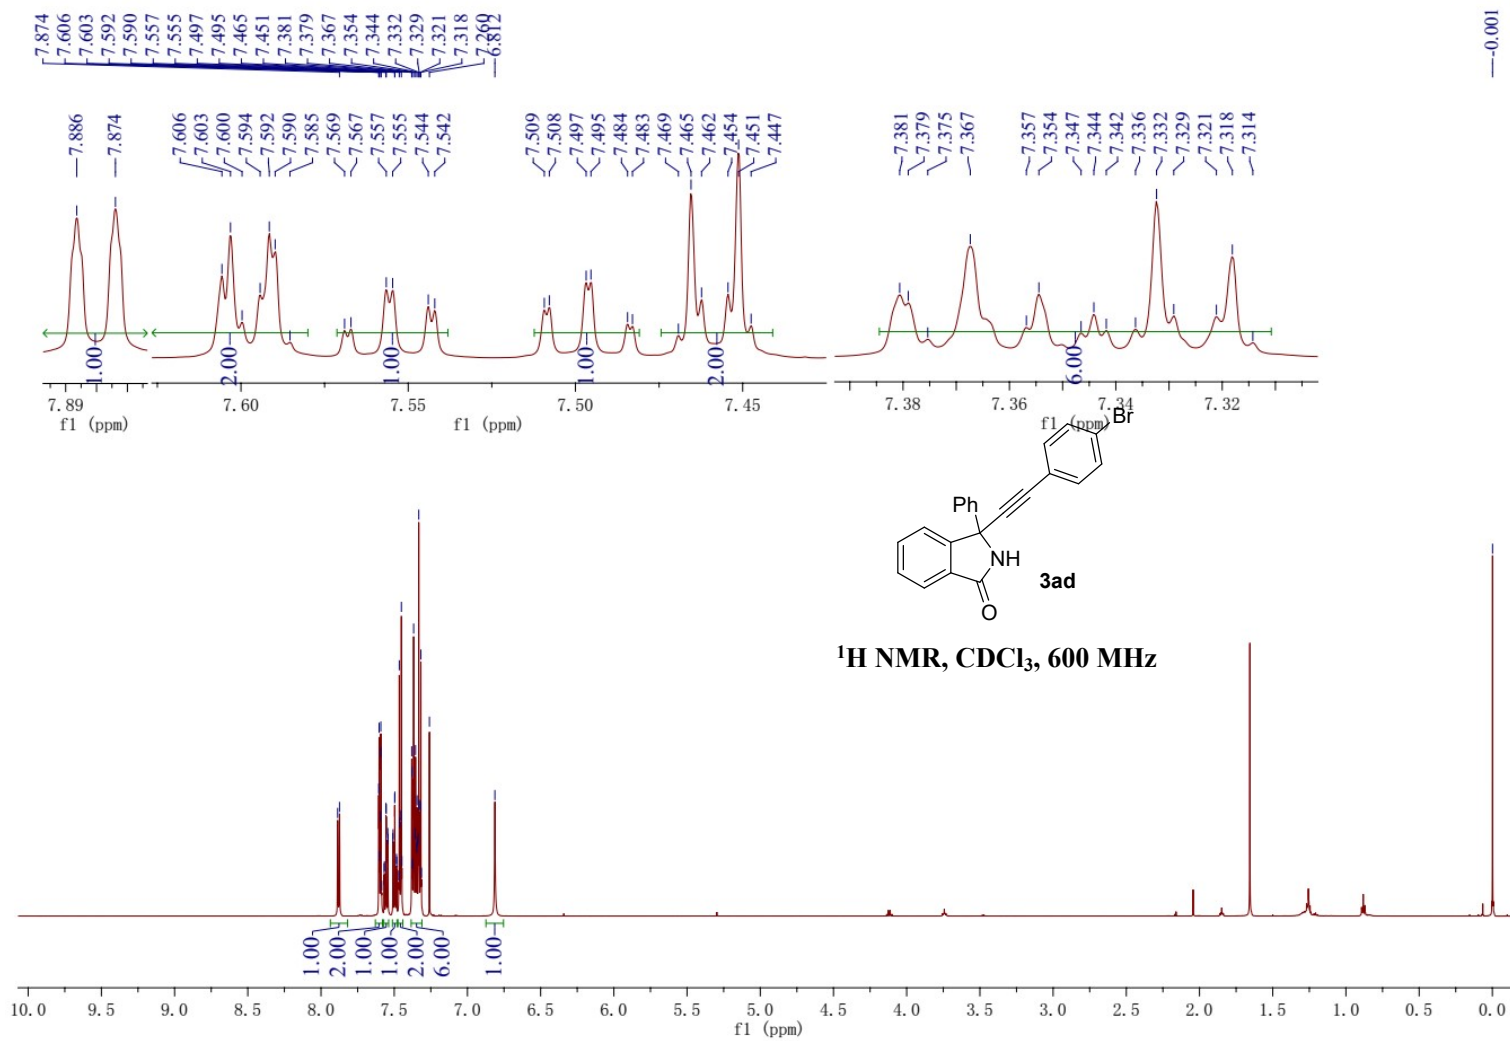

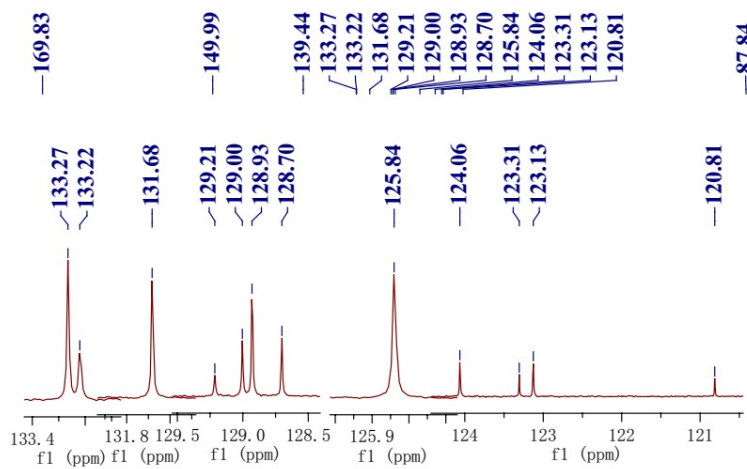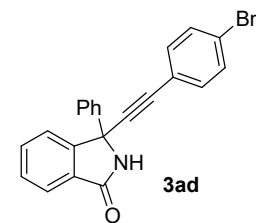

$^{13}\text{C}$  NMR,  $\text{CDCl}_3$ , 150 MHz

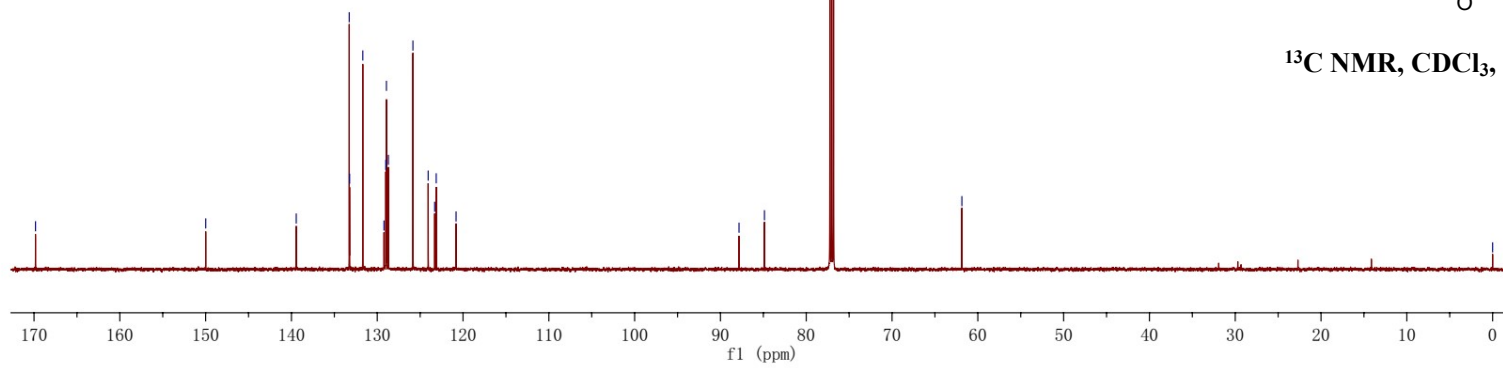

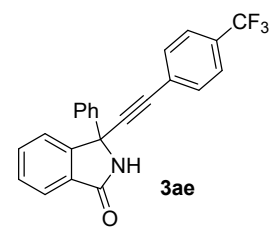

**<sup>1</sup>H NMR, CDCl<sub>3</sub>, 600 MHz**

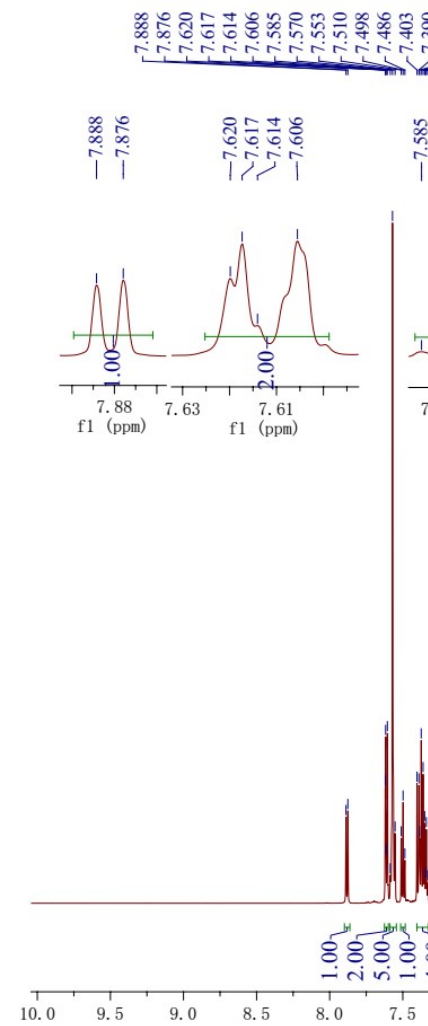



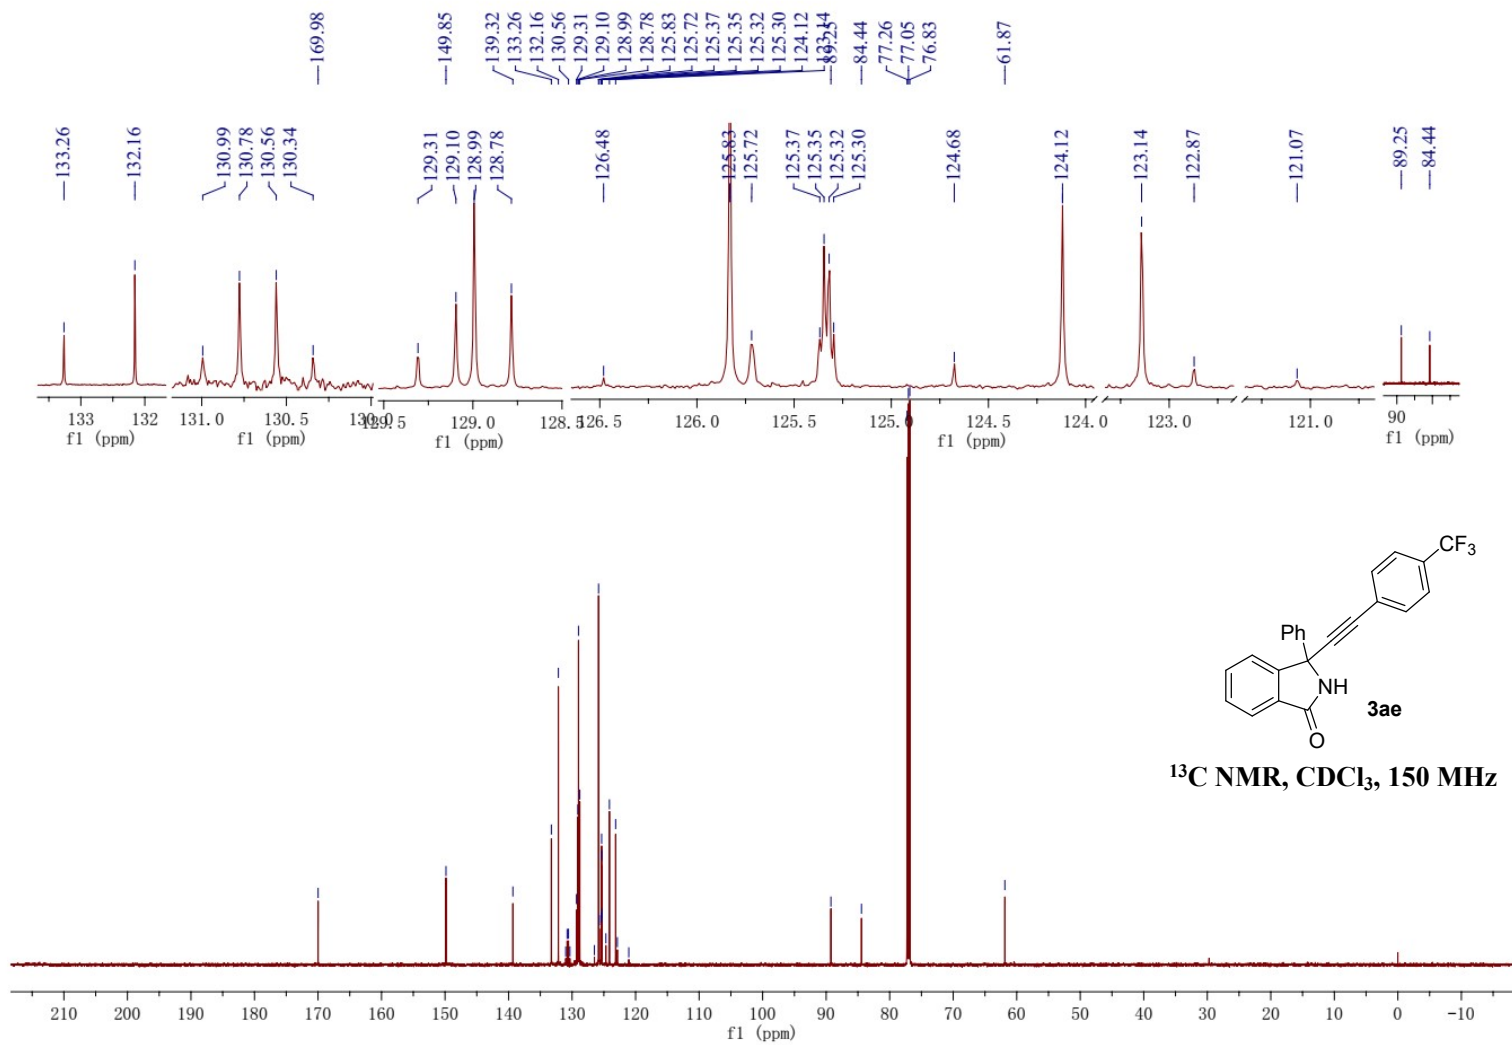

-62.90

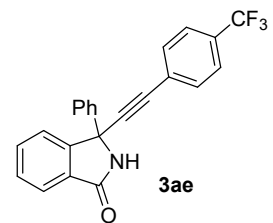

<sup>19</sup>F NMR, CDCl<sub>3</sub>, 565 MHz

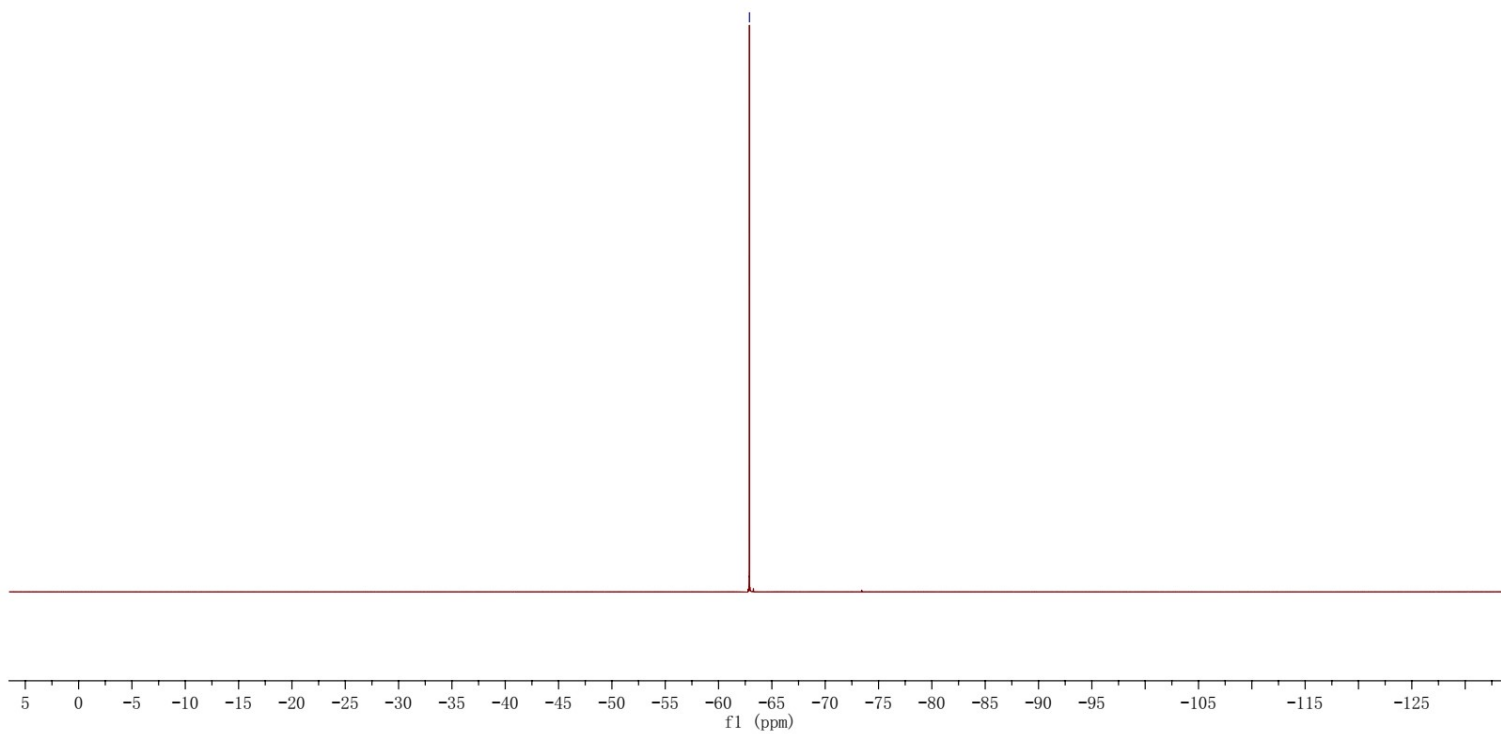

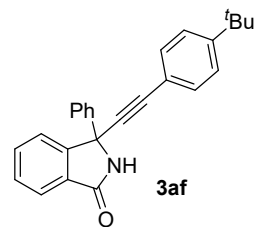

<sup>1</sup>H NMR, CDCl<sub>3</sub>, 600 MHz

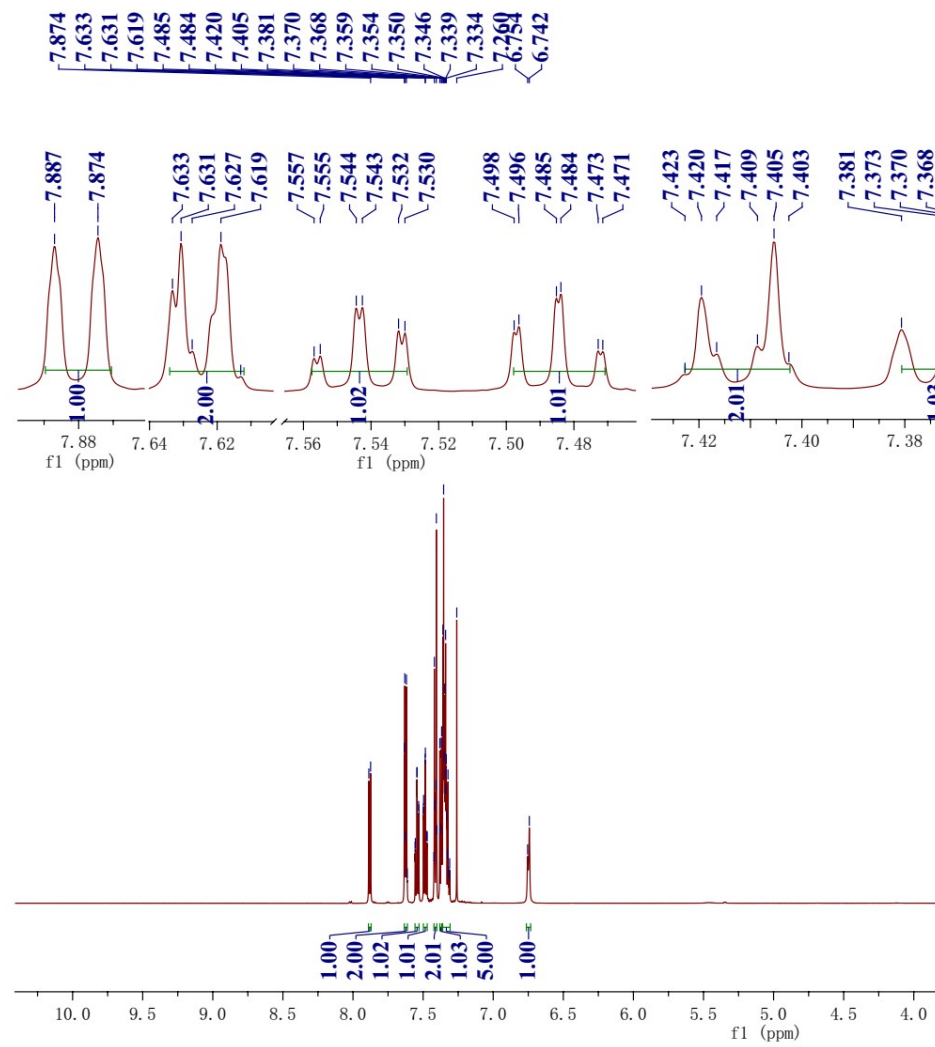

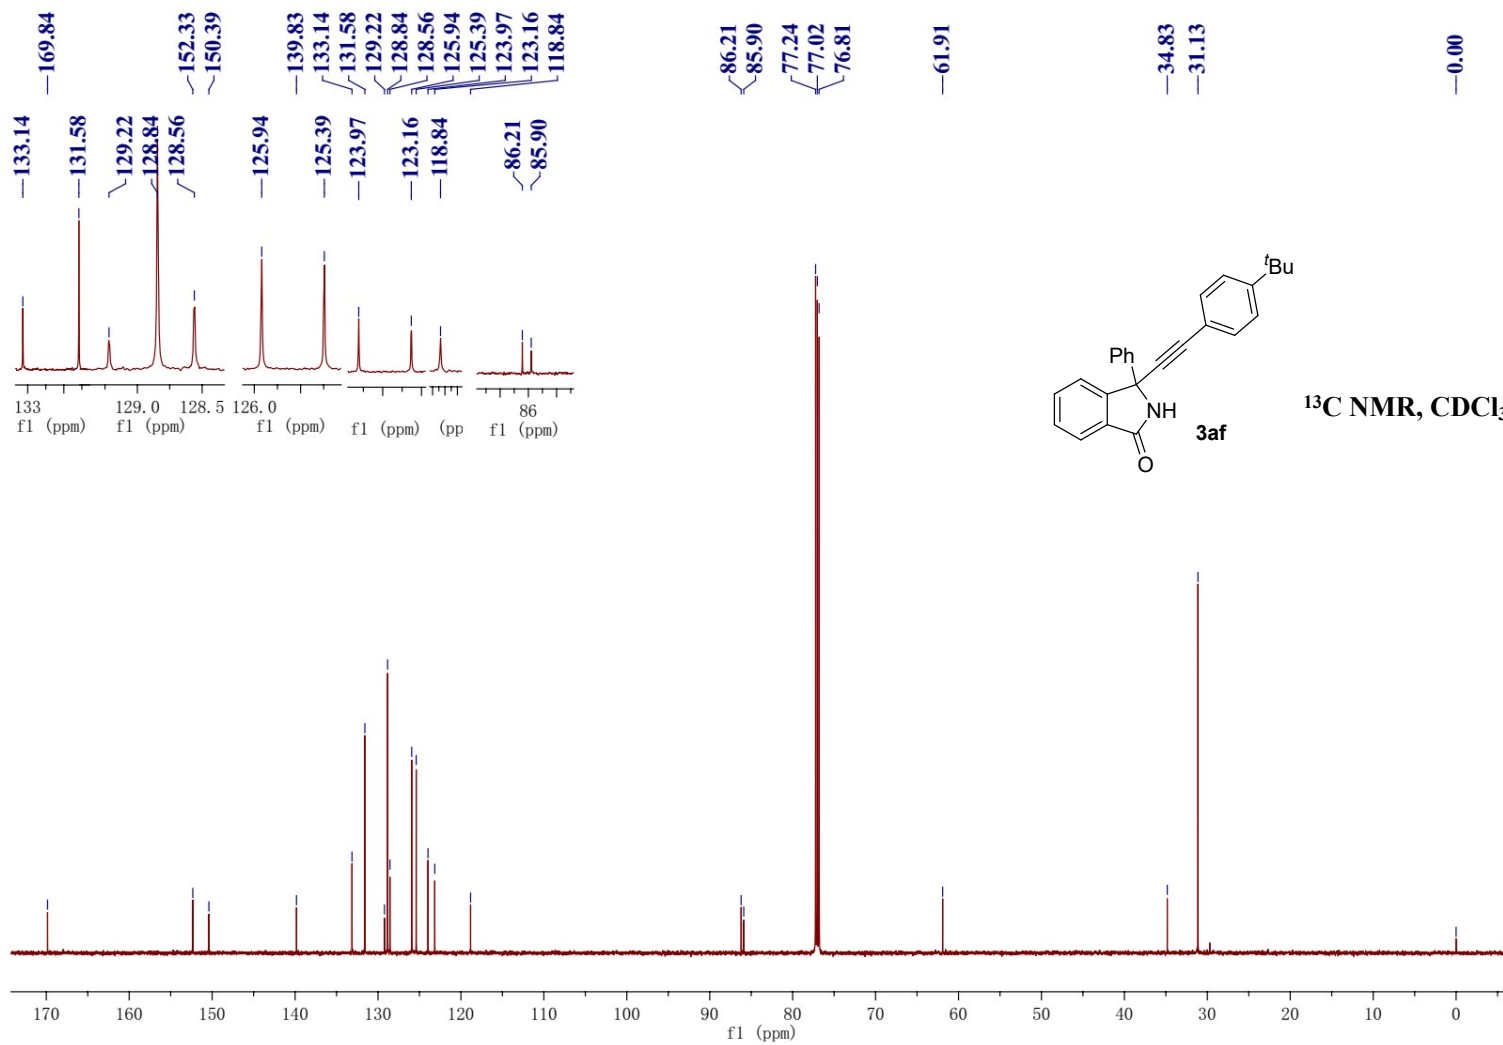

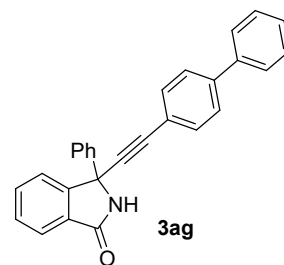

<sup>1</sup>H NMR, CDCl<sub>3</sub>, 600 MHz

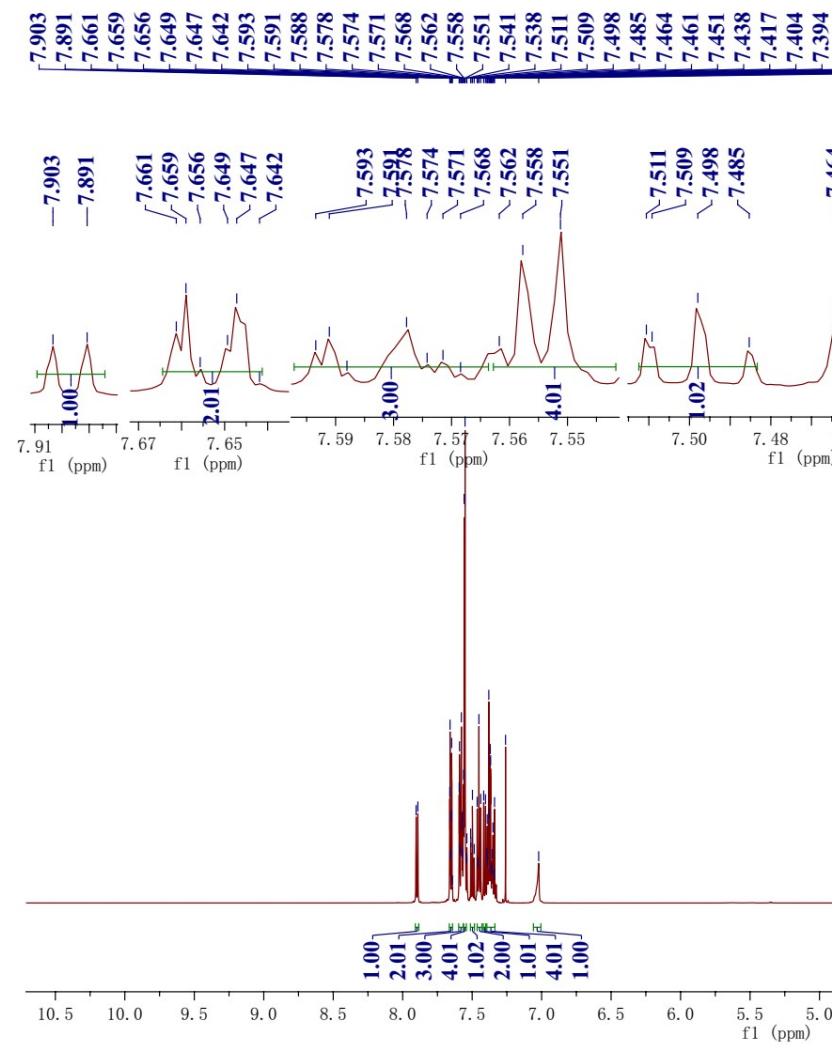

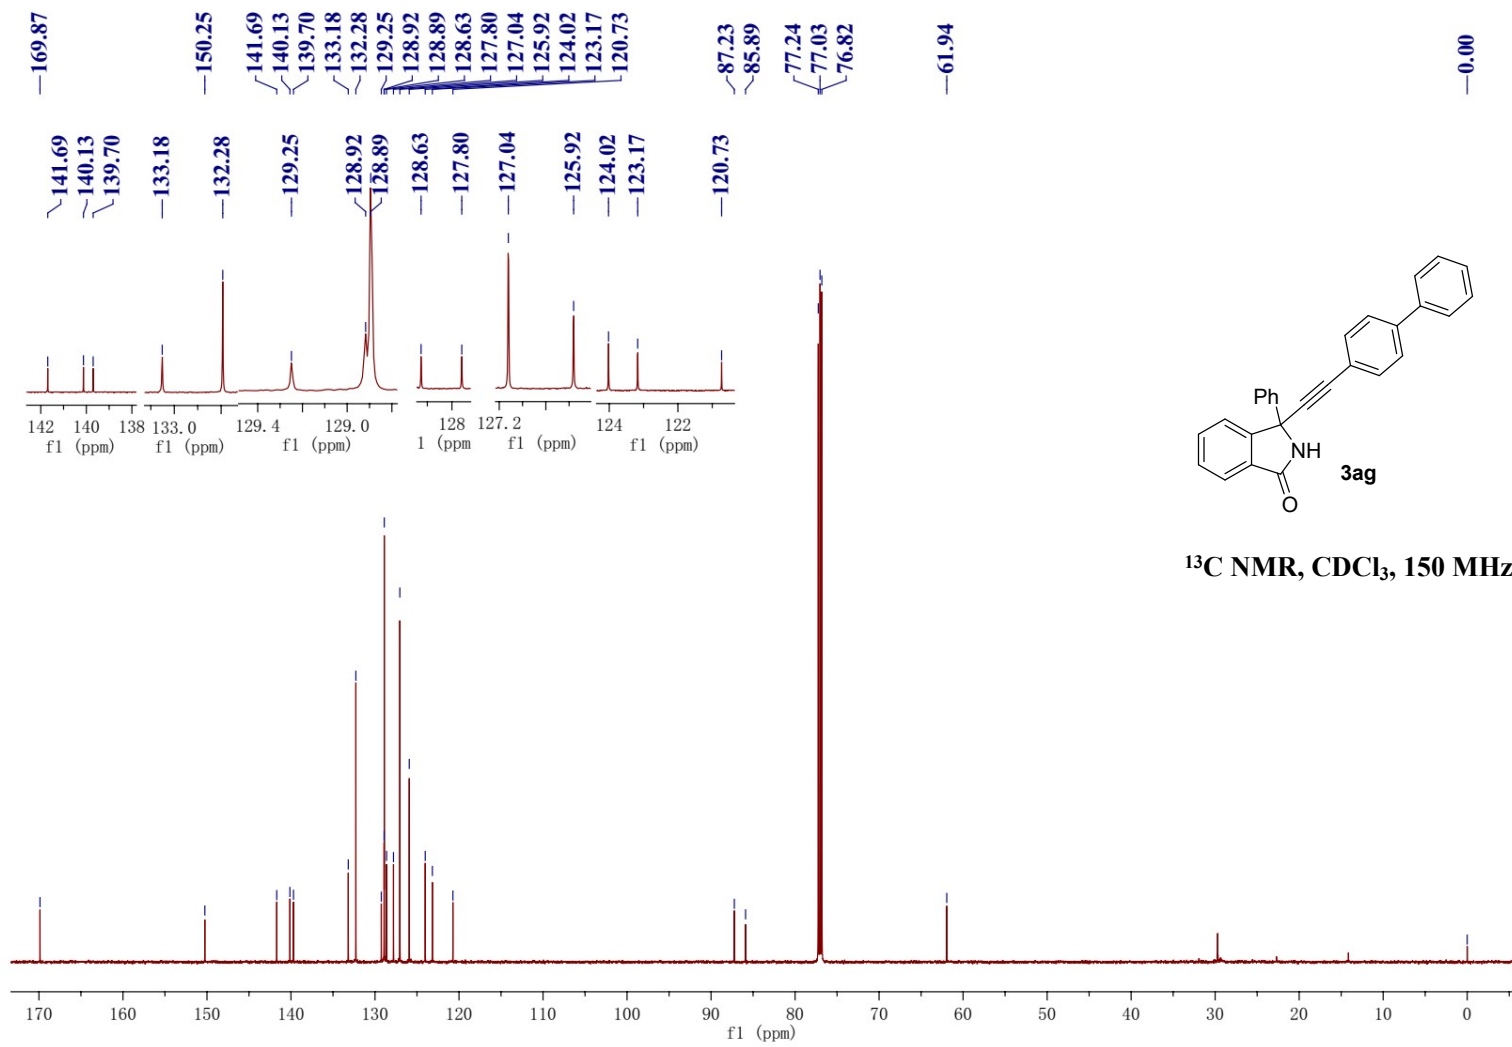

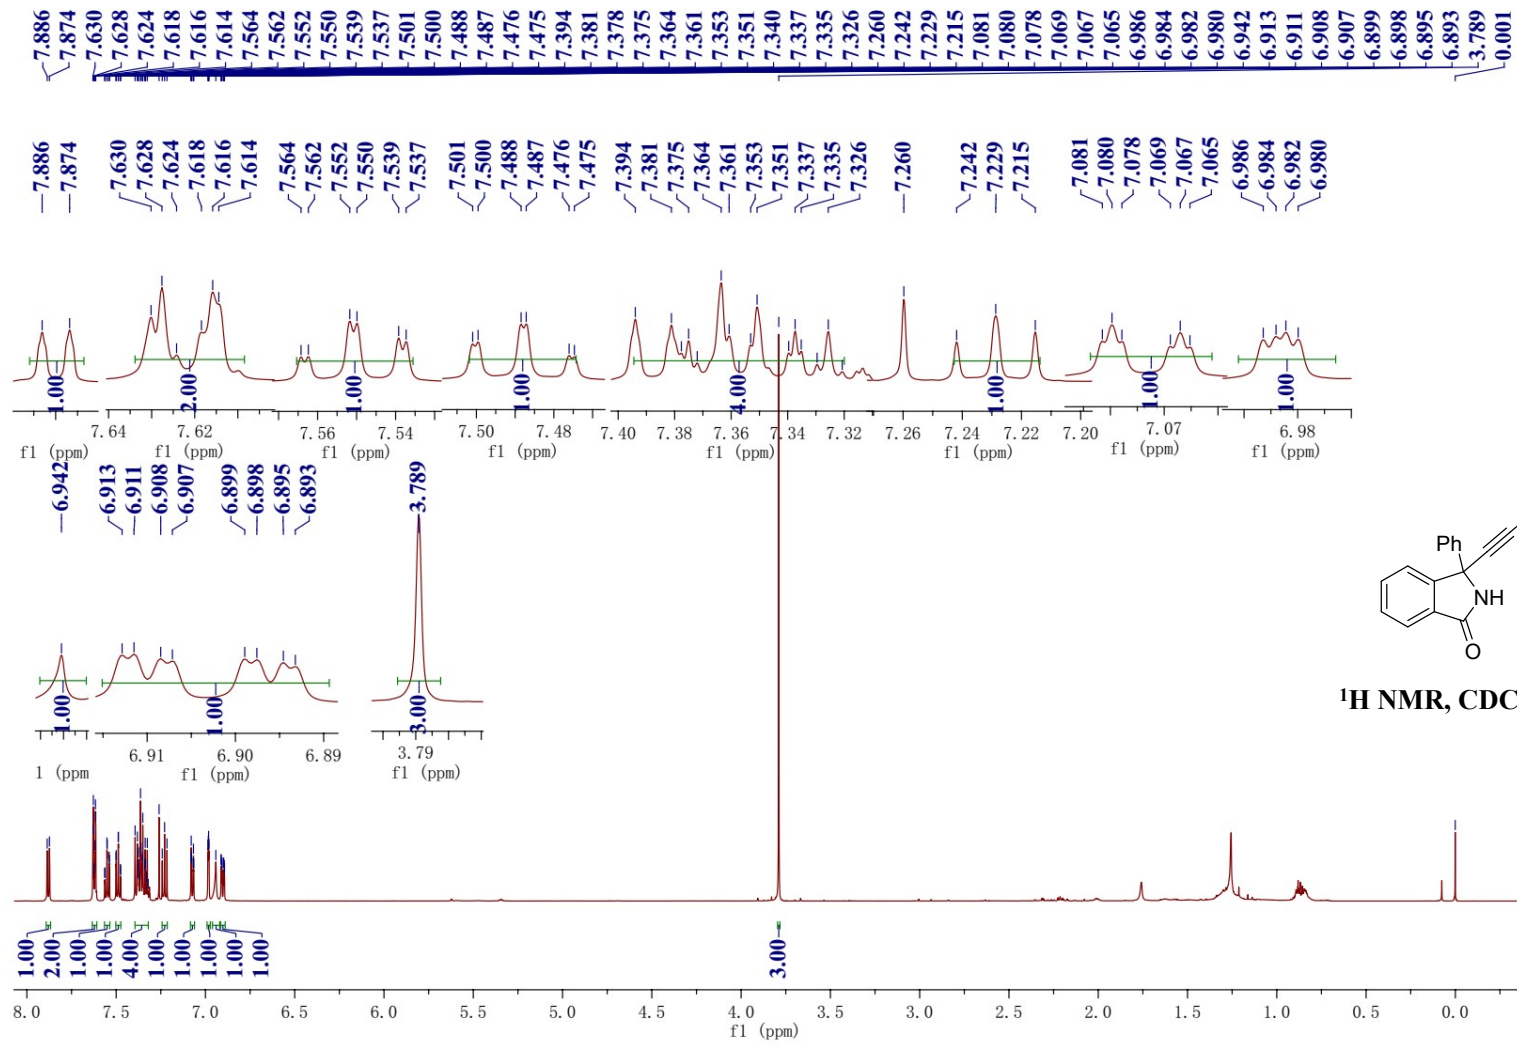

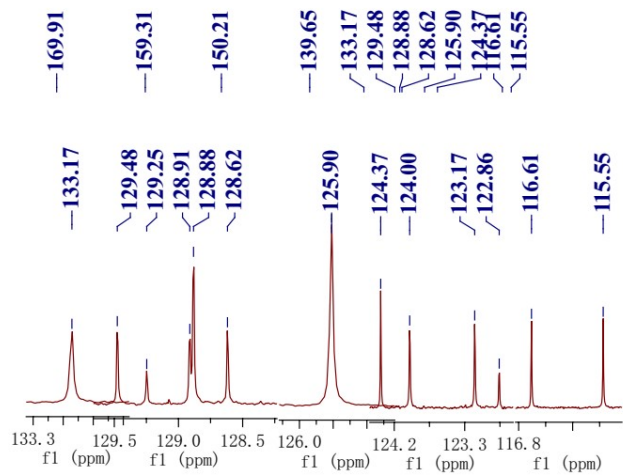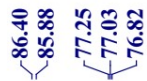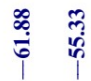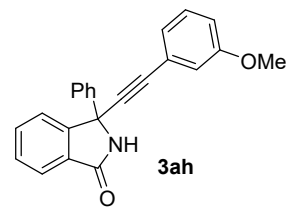

**<sup>13</sup>C NMR, CDCl<sub>3</sub>, 150 MHz**

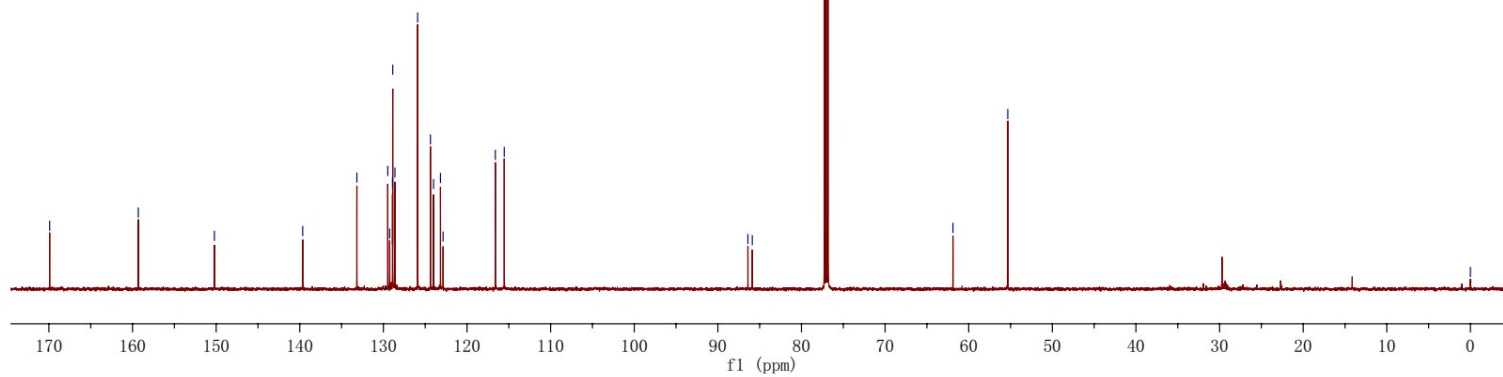



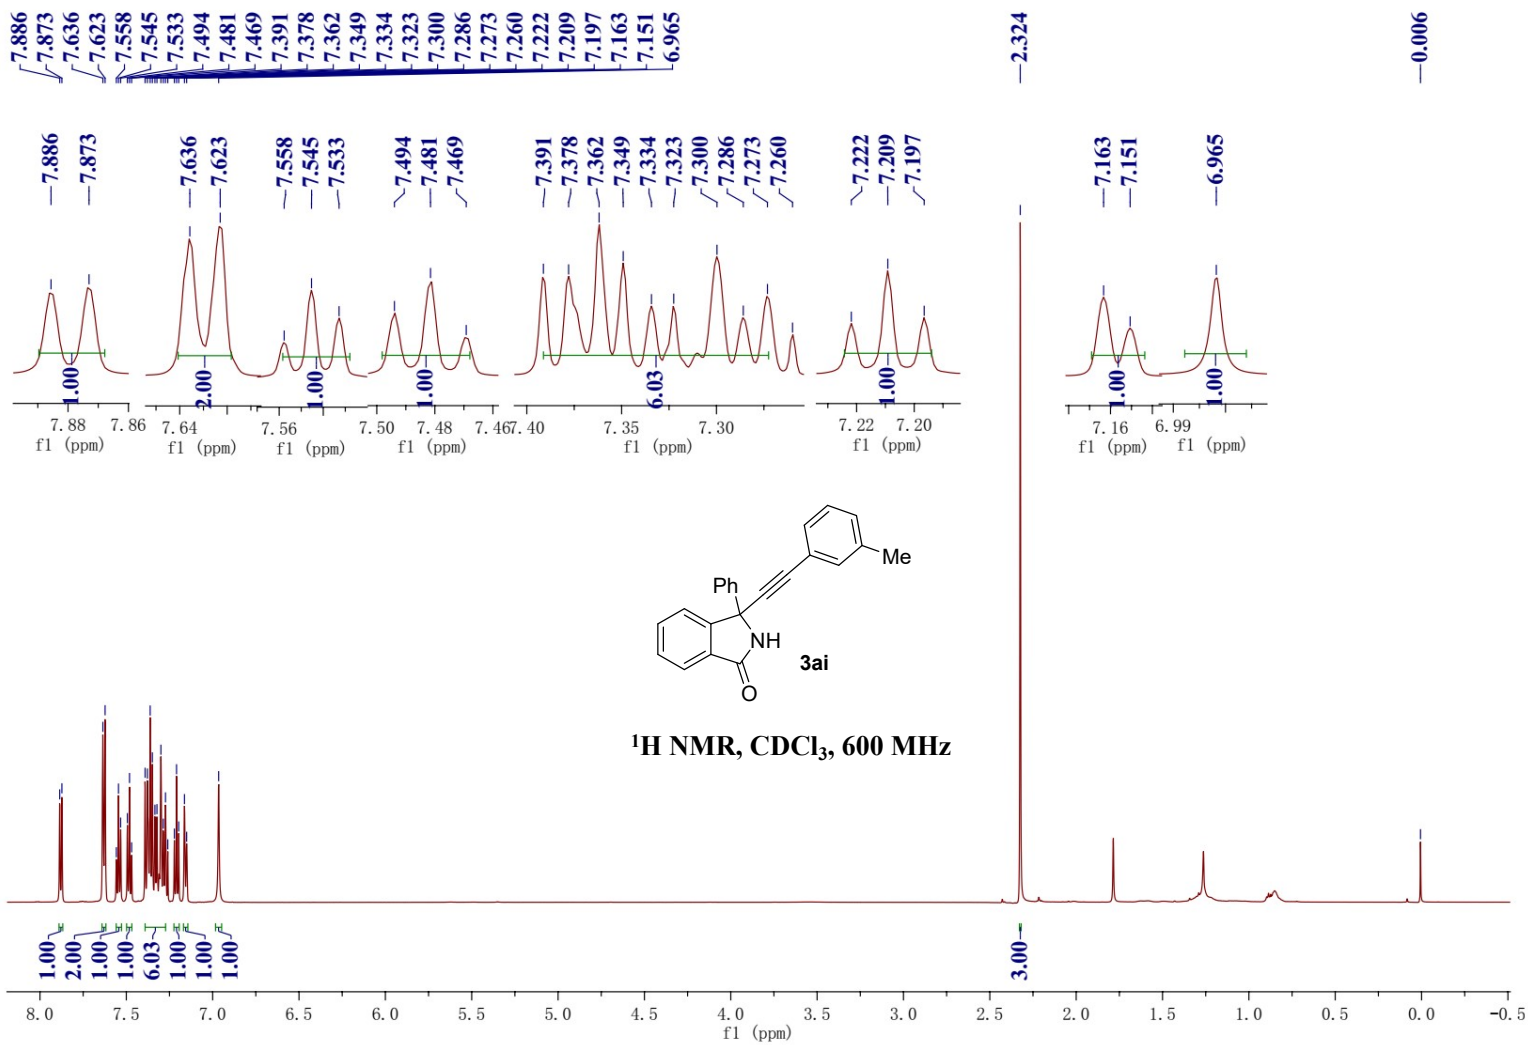

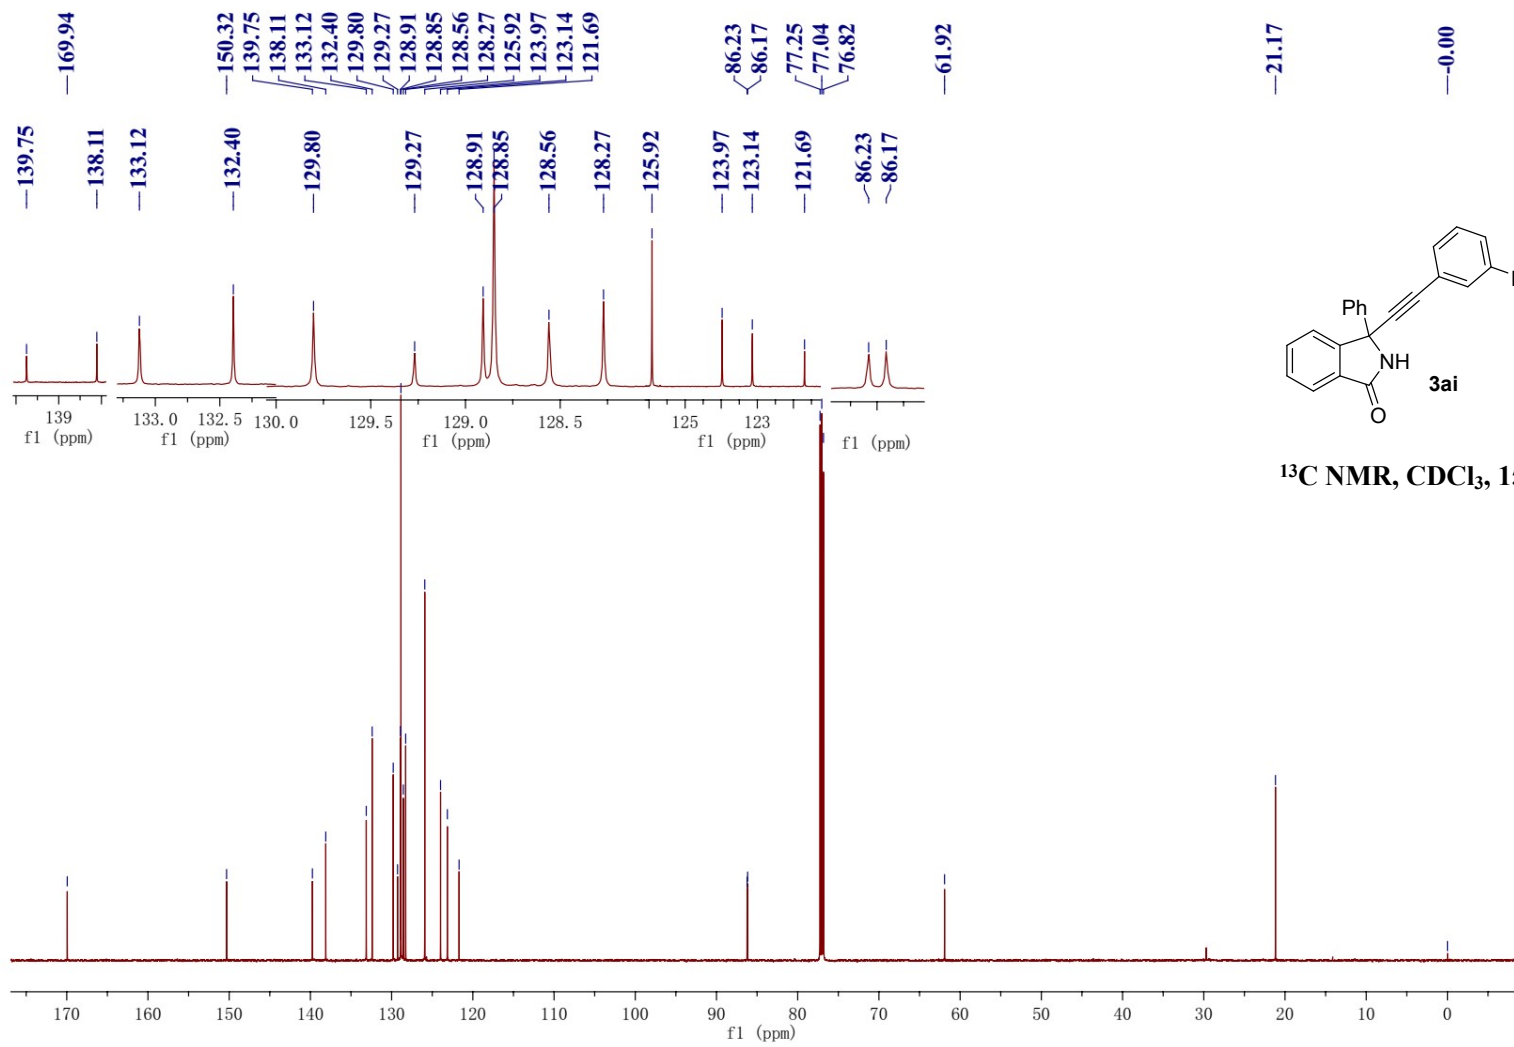

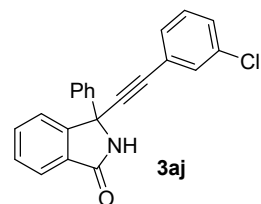

**<sup>1</sup>H NMR, CDCl<sub>3</sub>, 600 MHz**

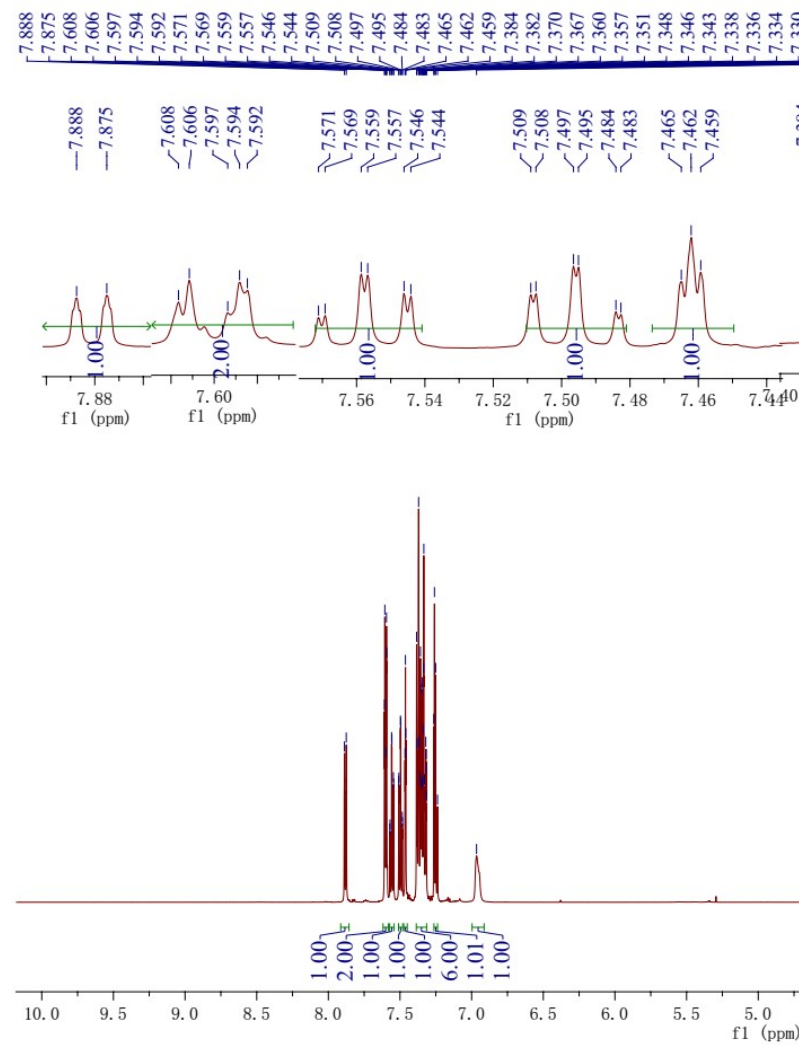

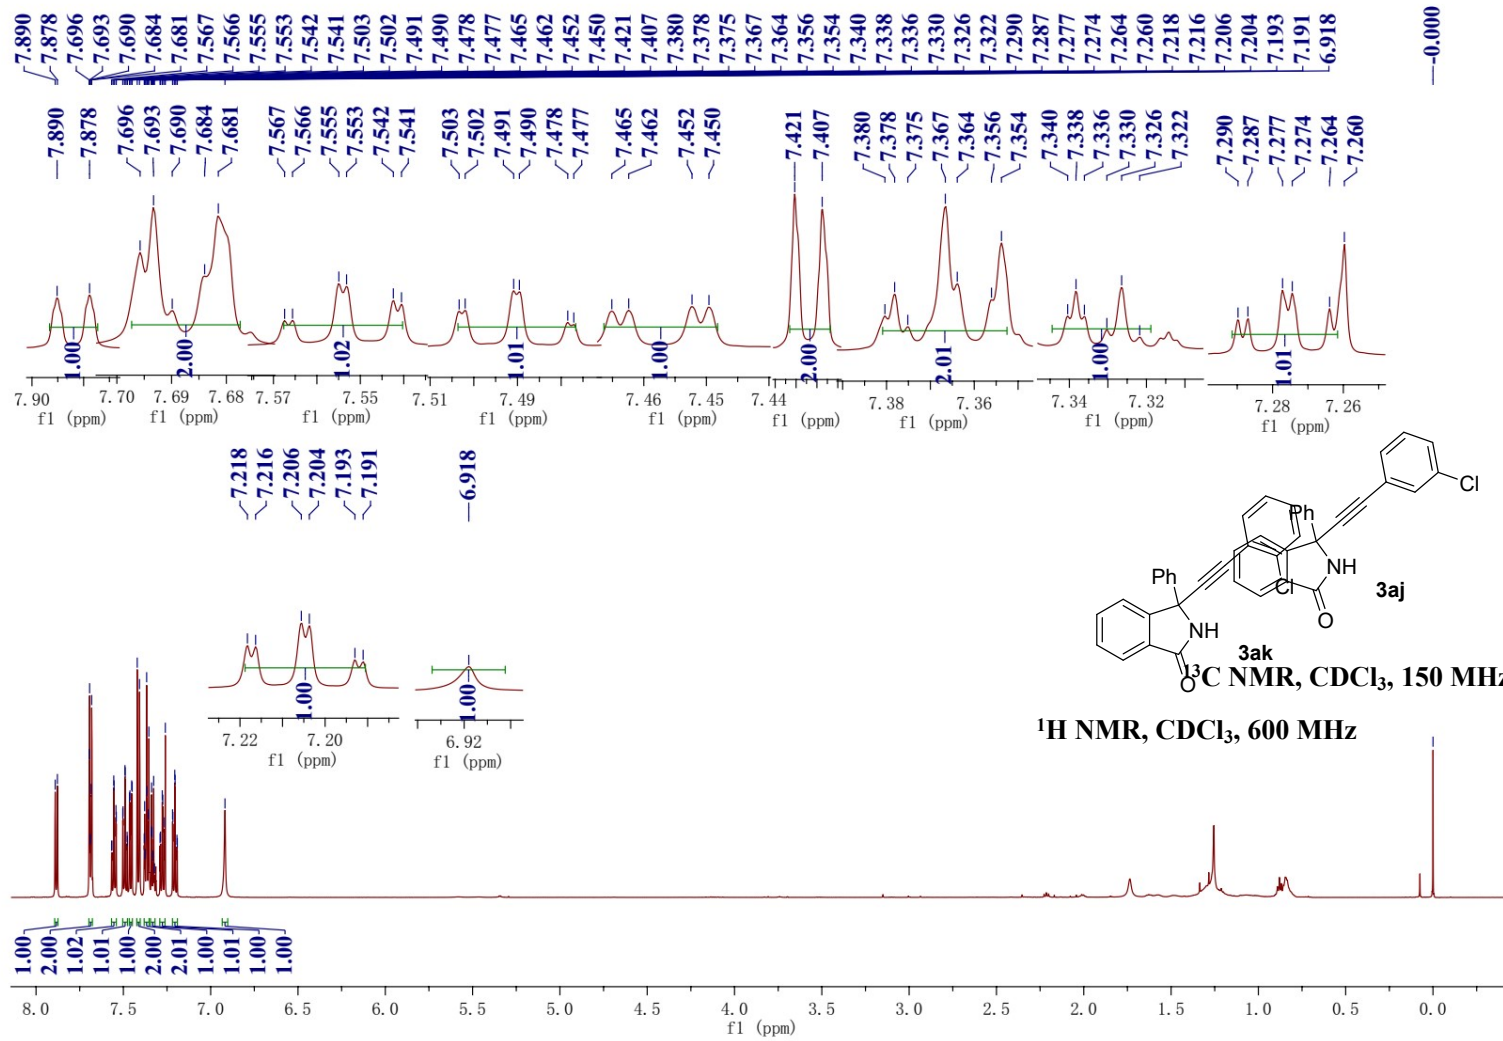

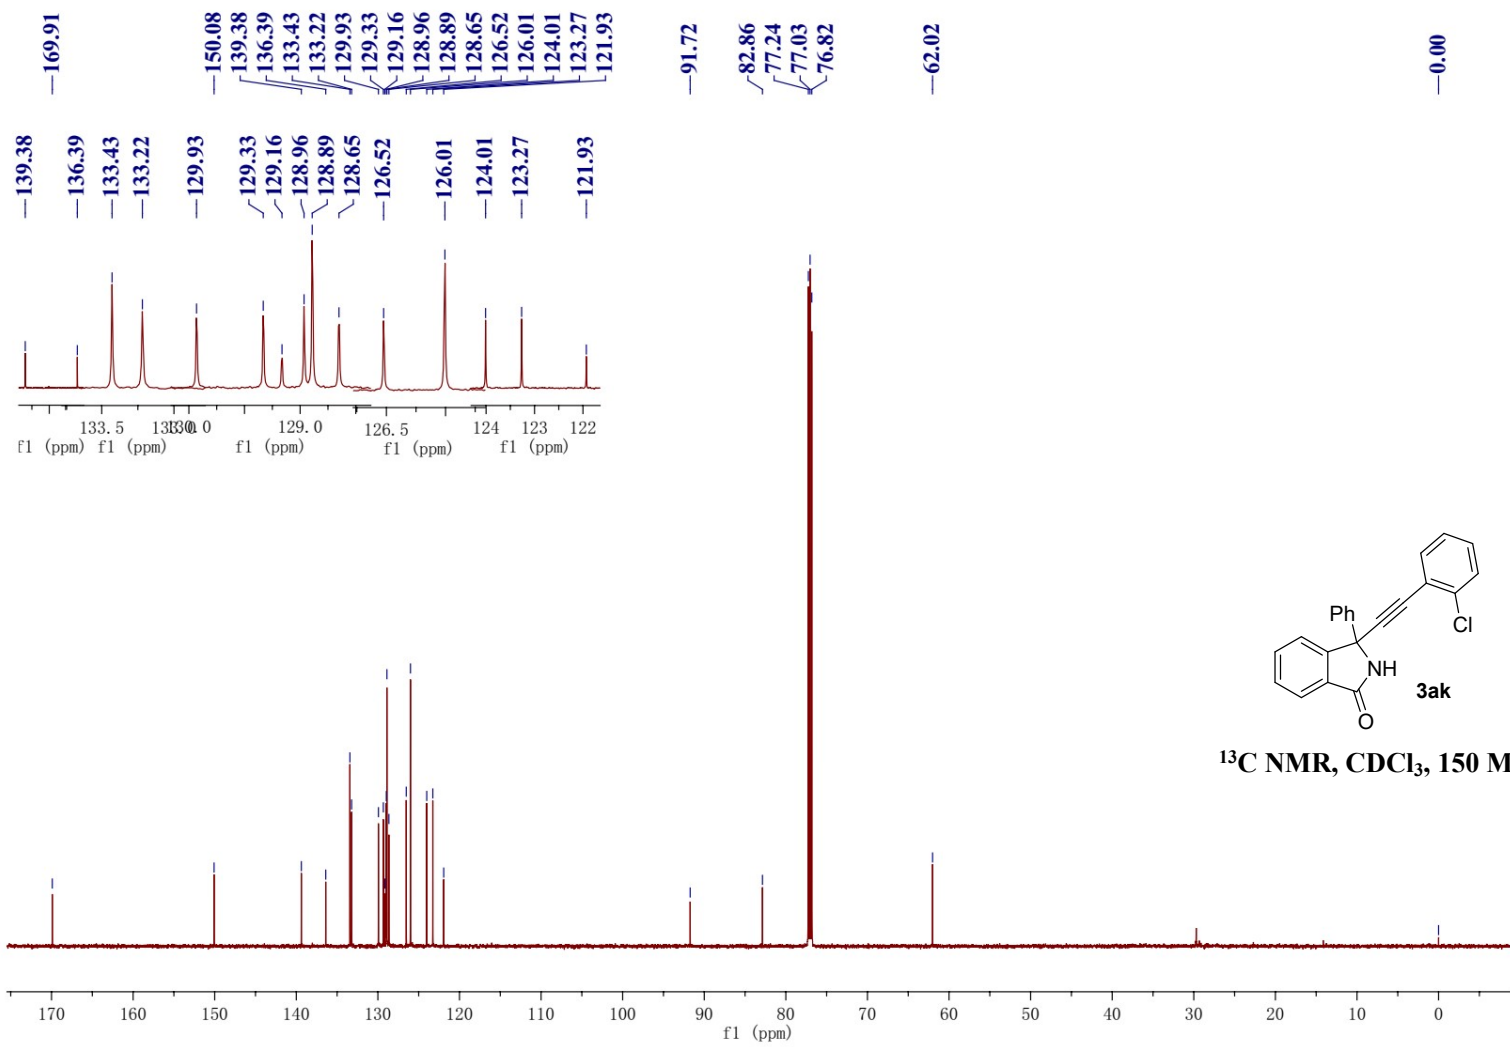

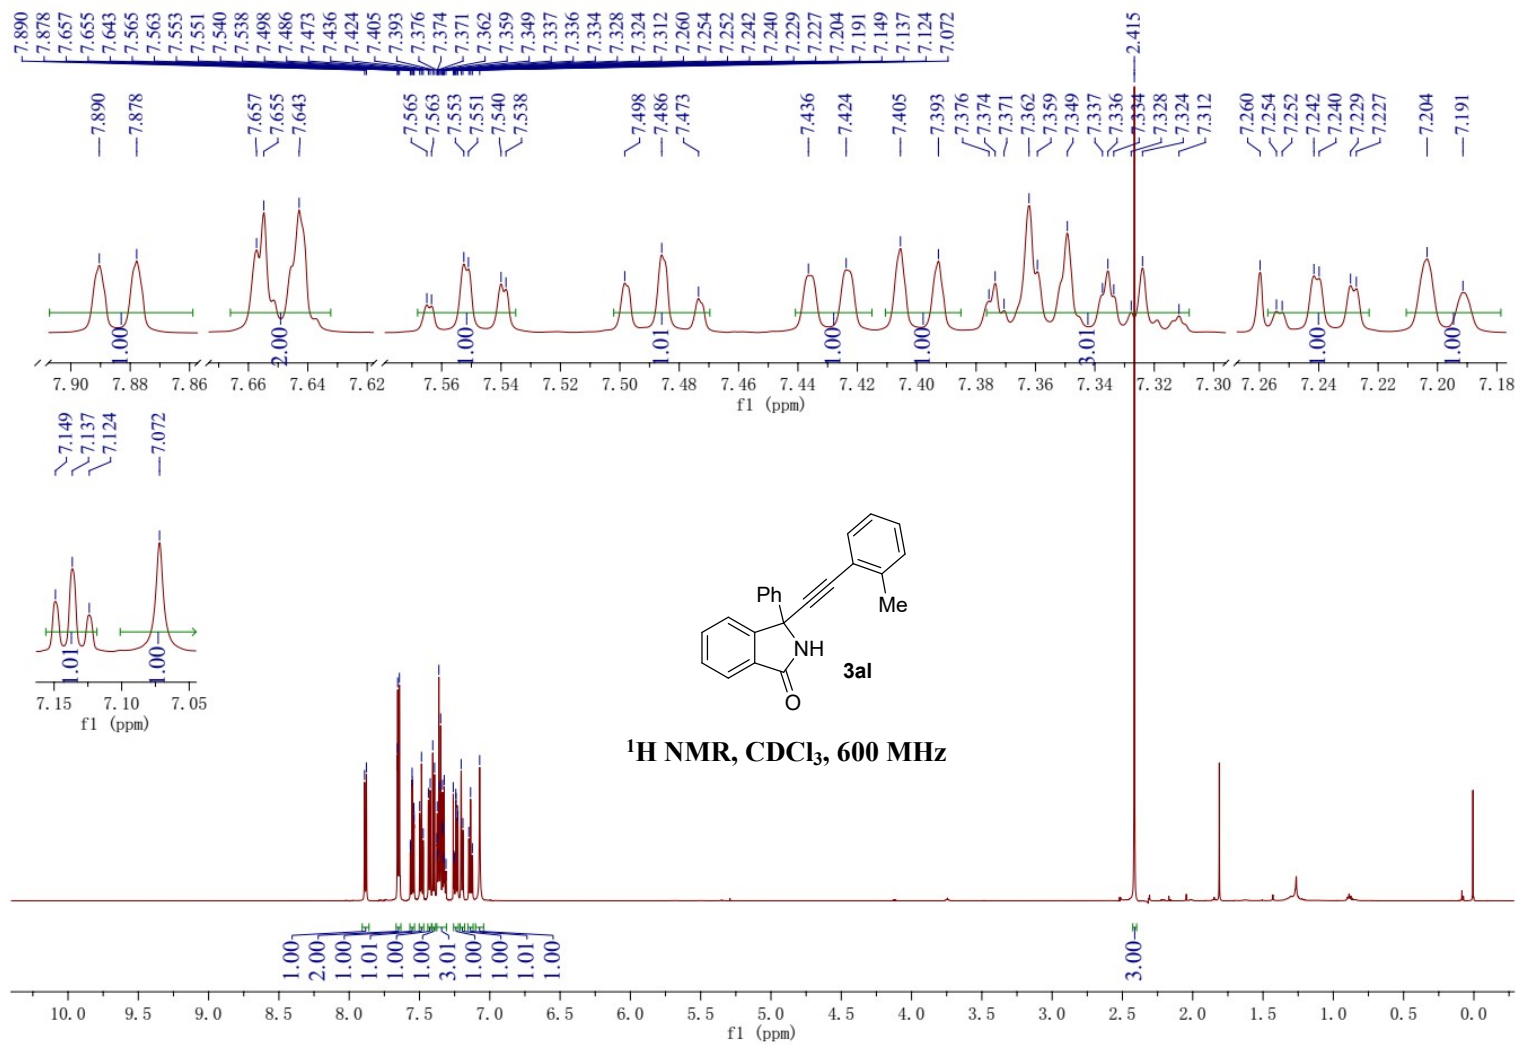

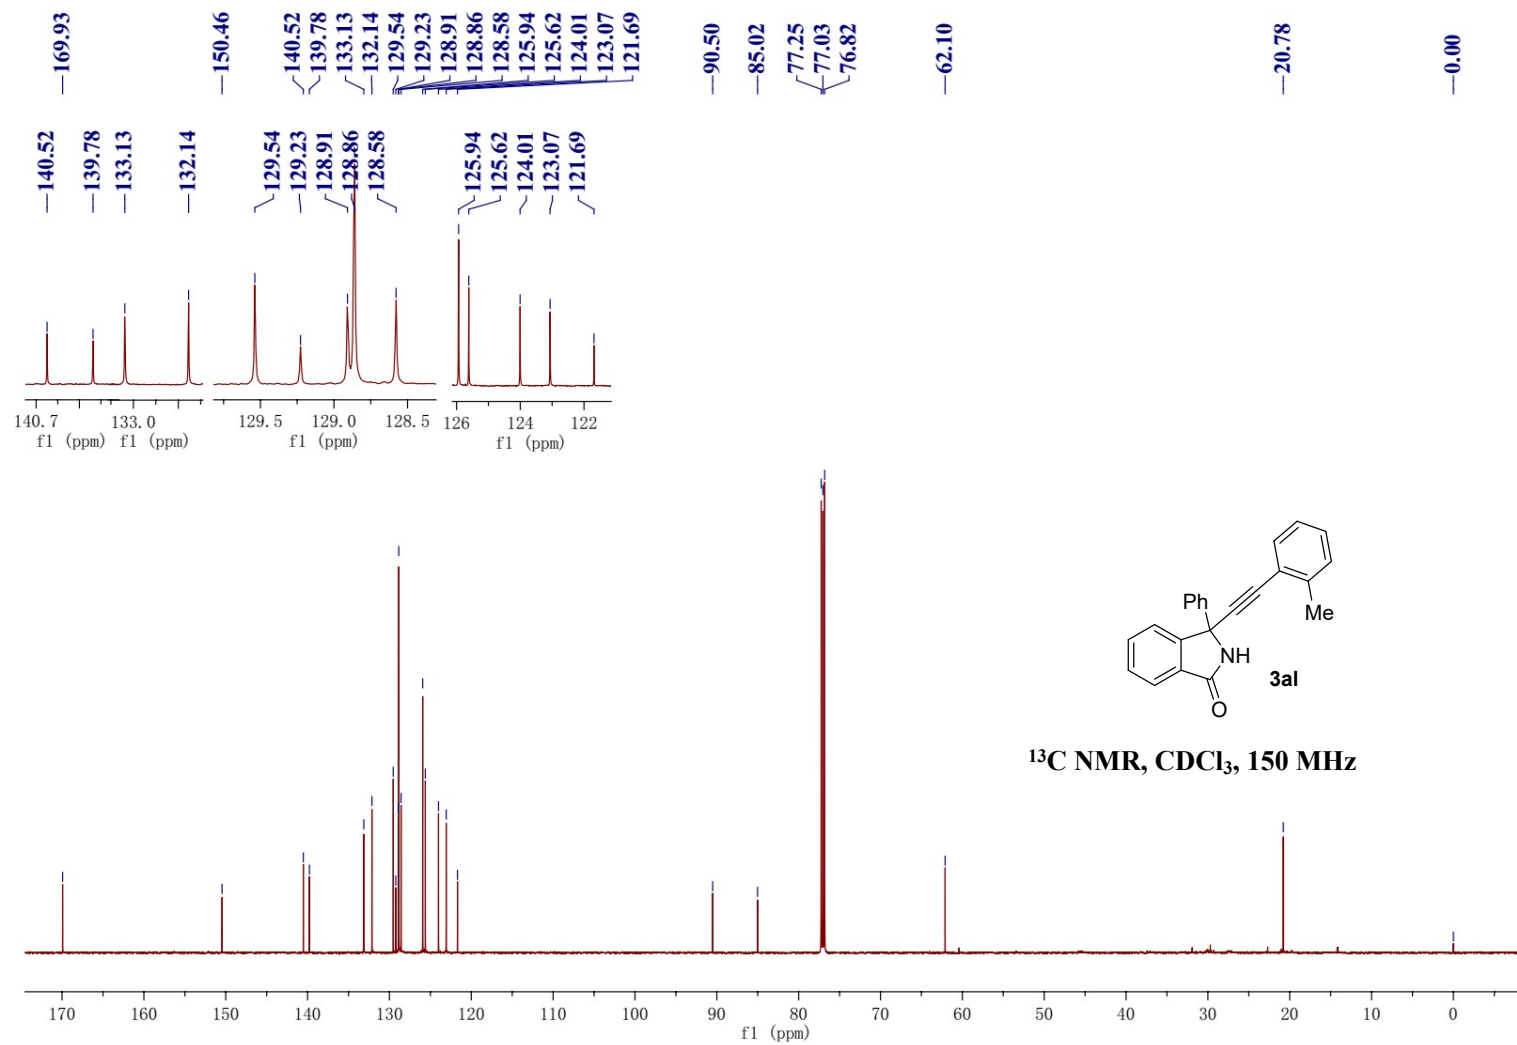

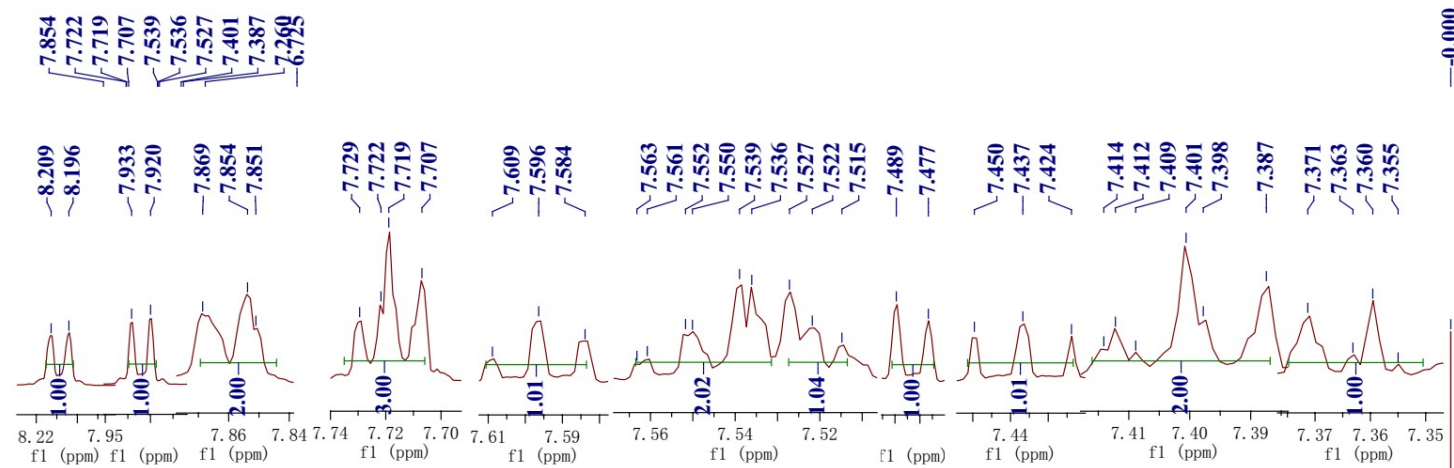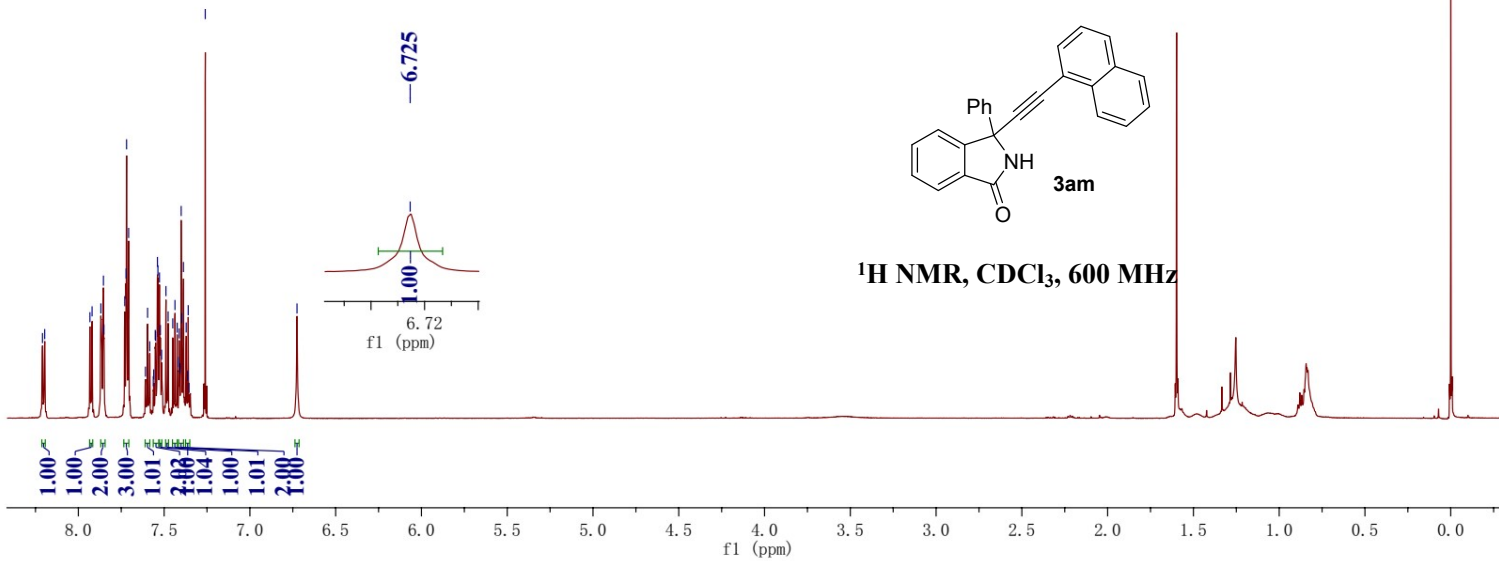



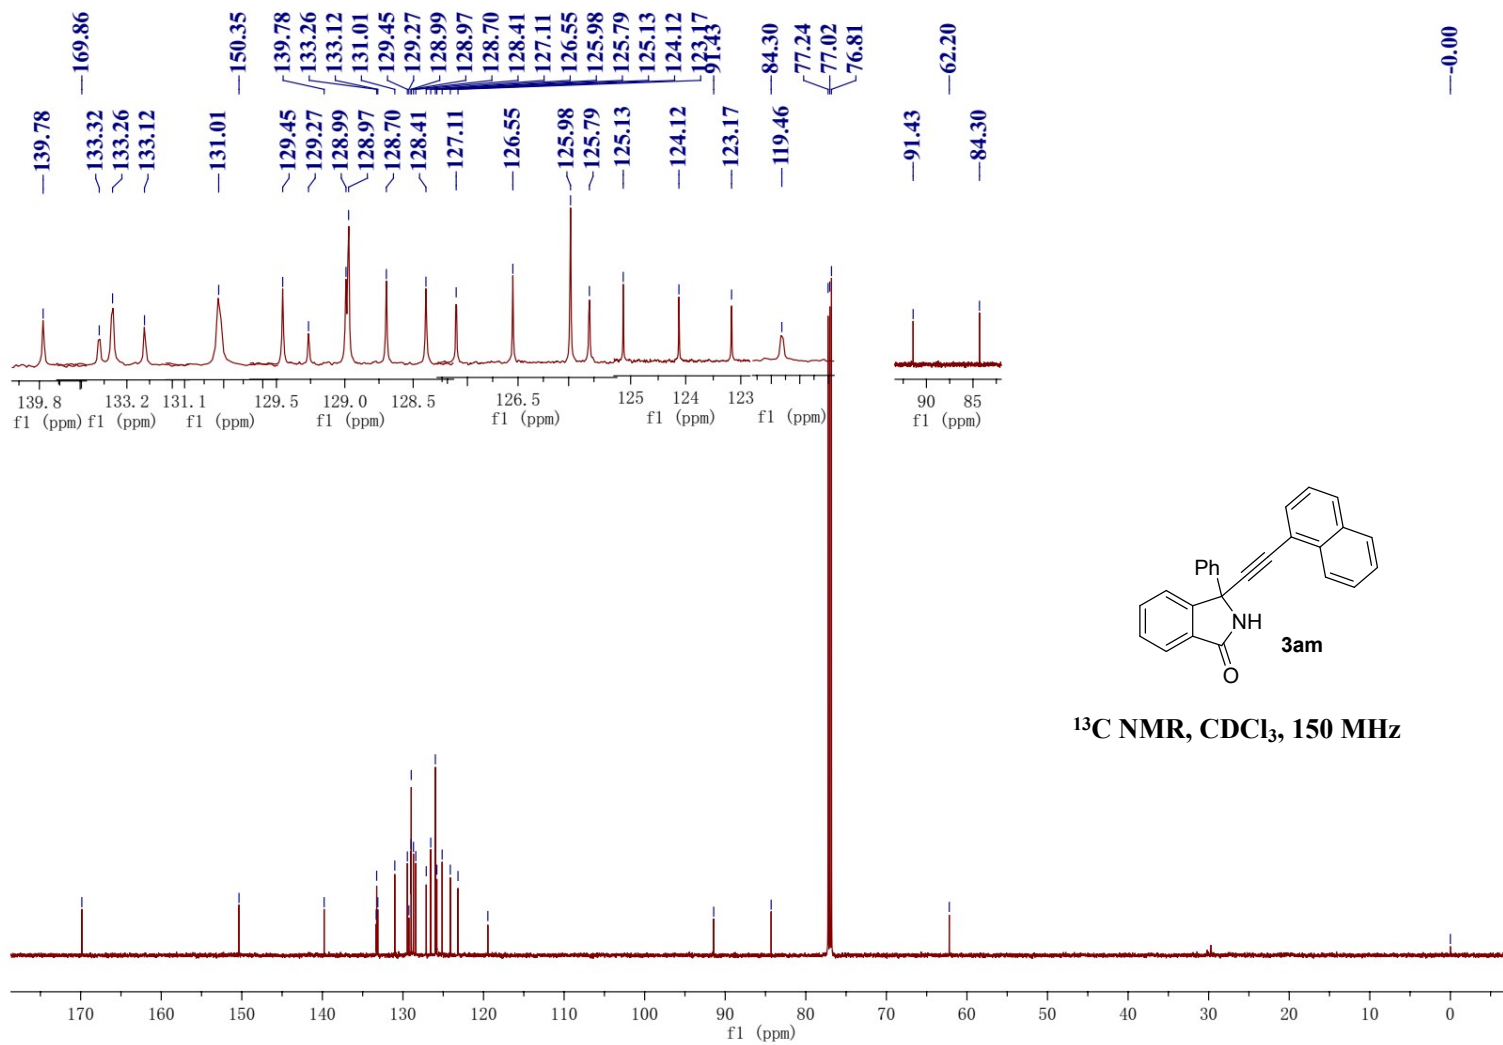

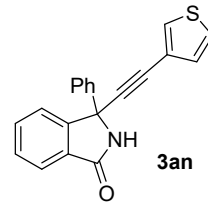

$^1\text{H NMR}$ ,  $\text{CDCl}_3$ , 600 MHz

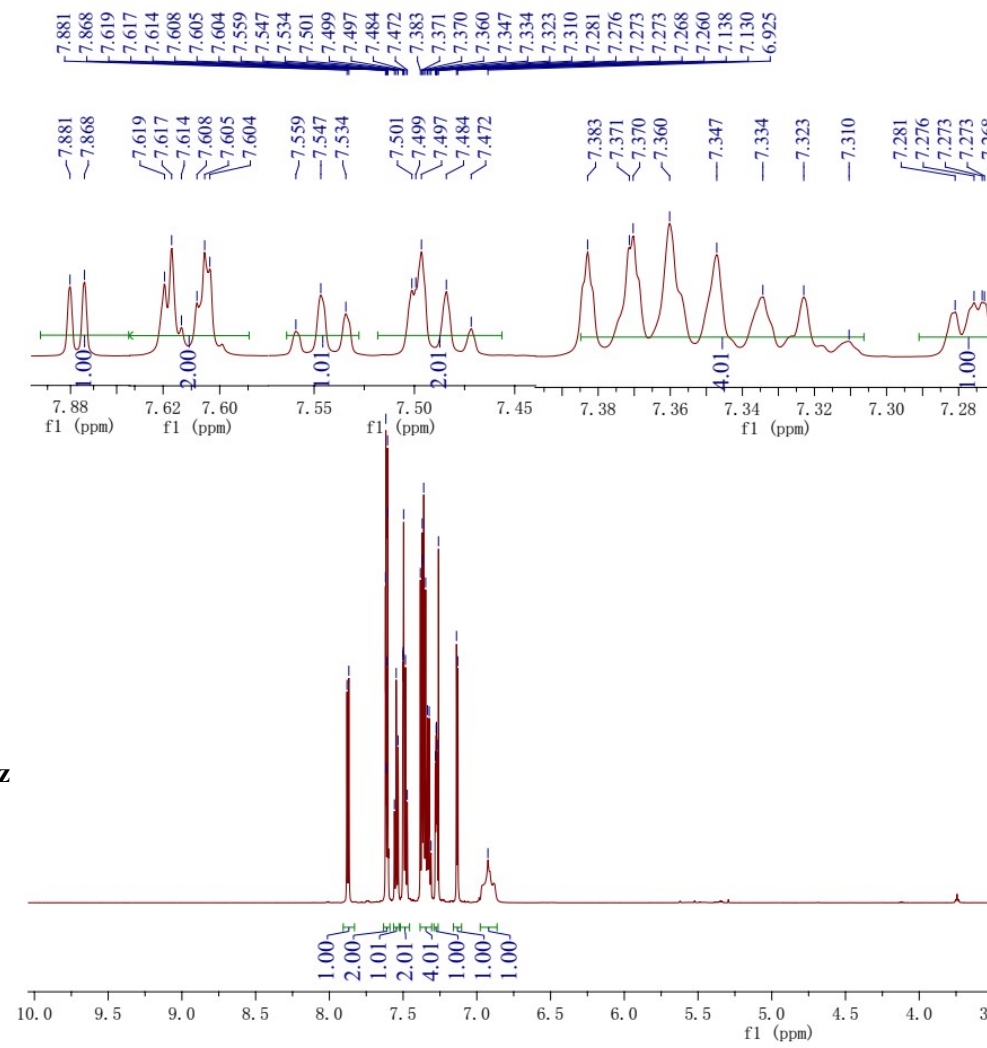

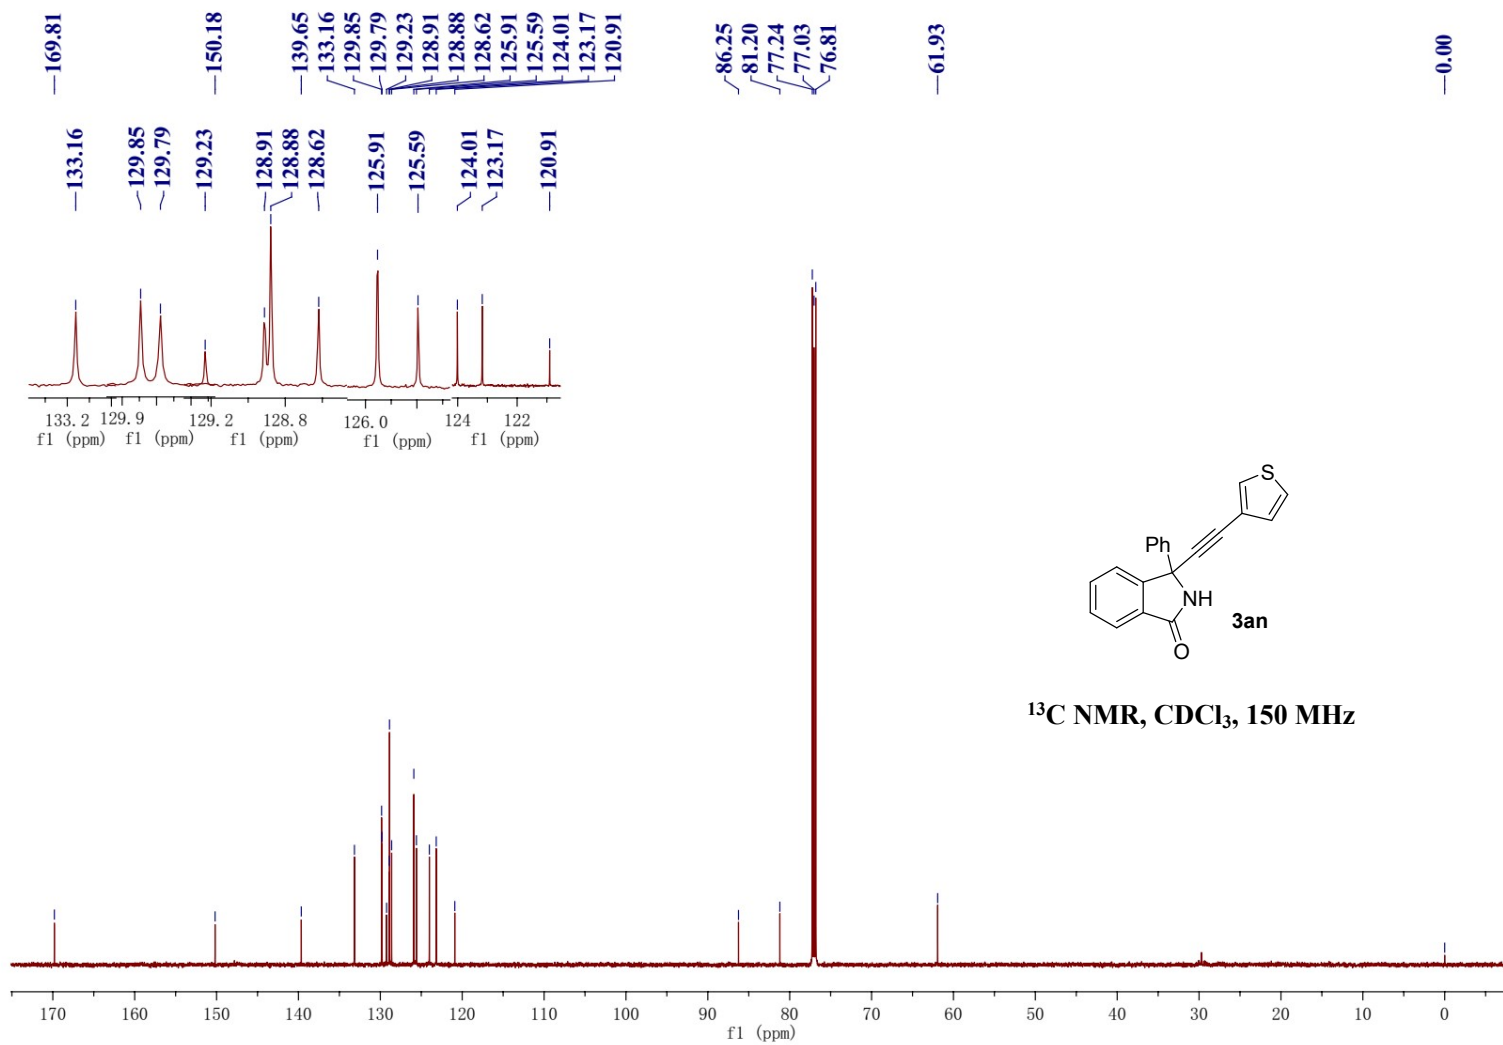

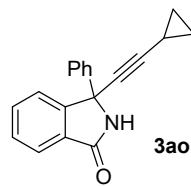

<sup>1</sup>H NMR, CDCl<sub>3</sub>, 600 MHz

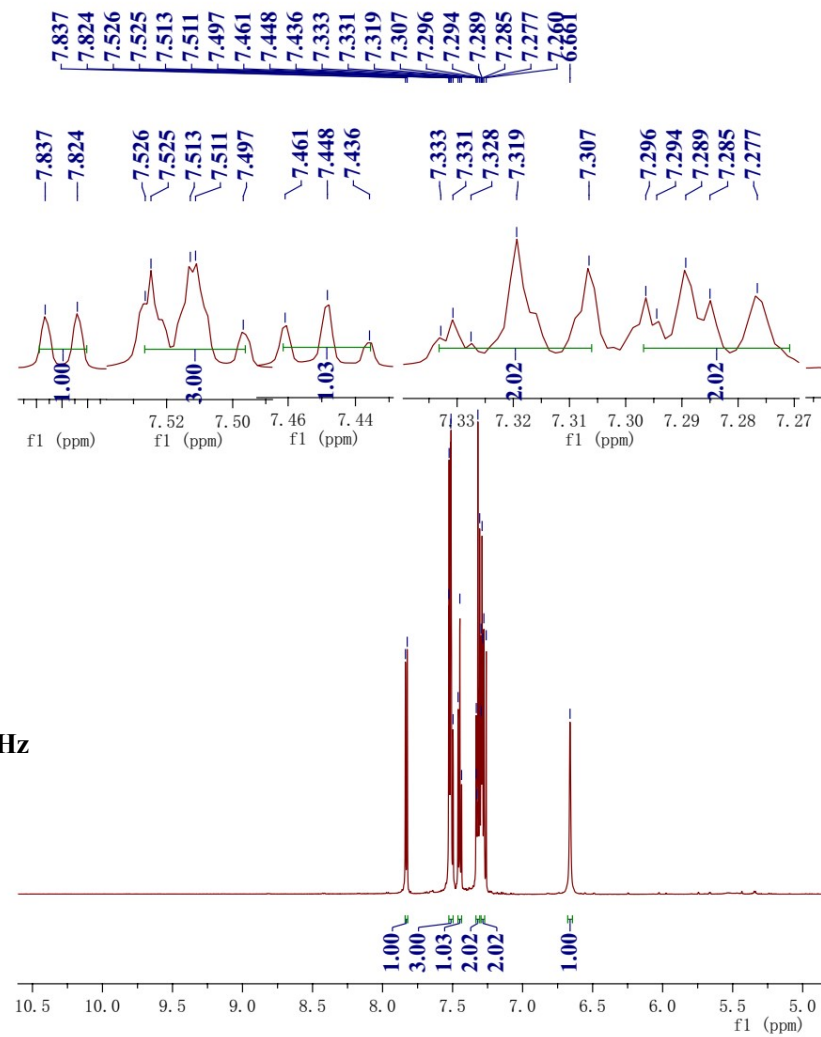

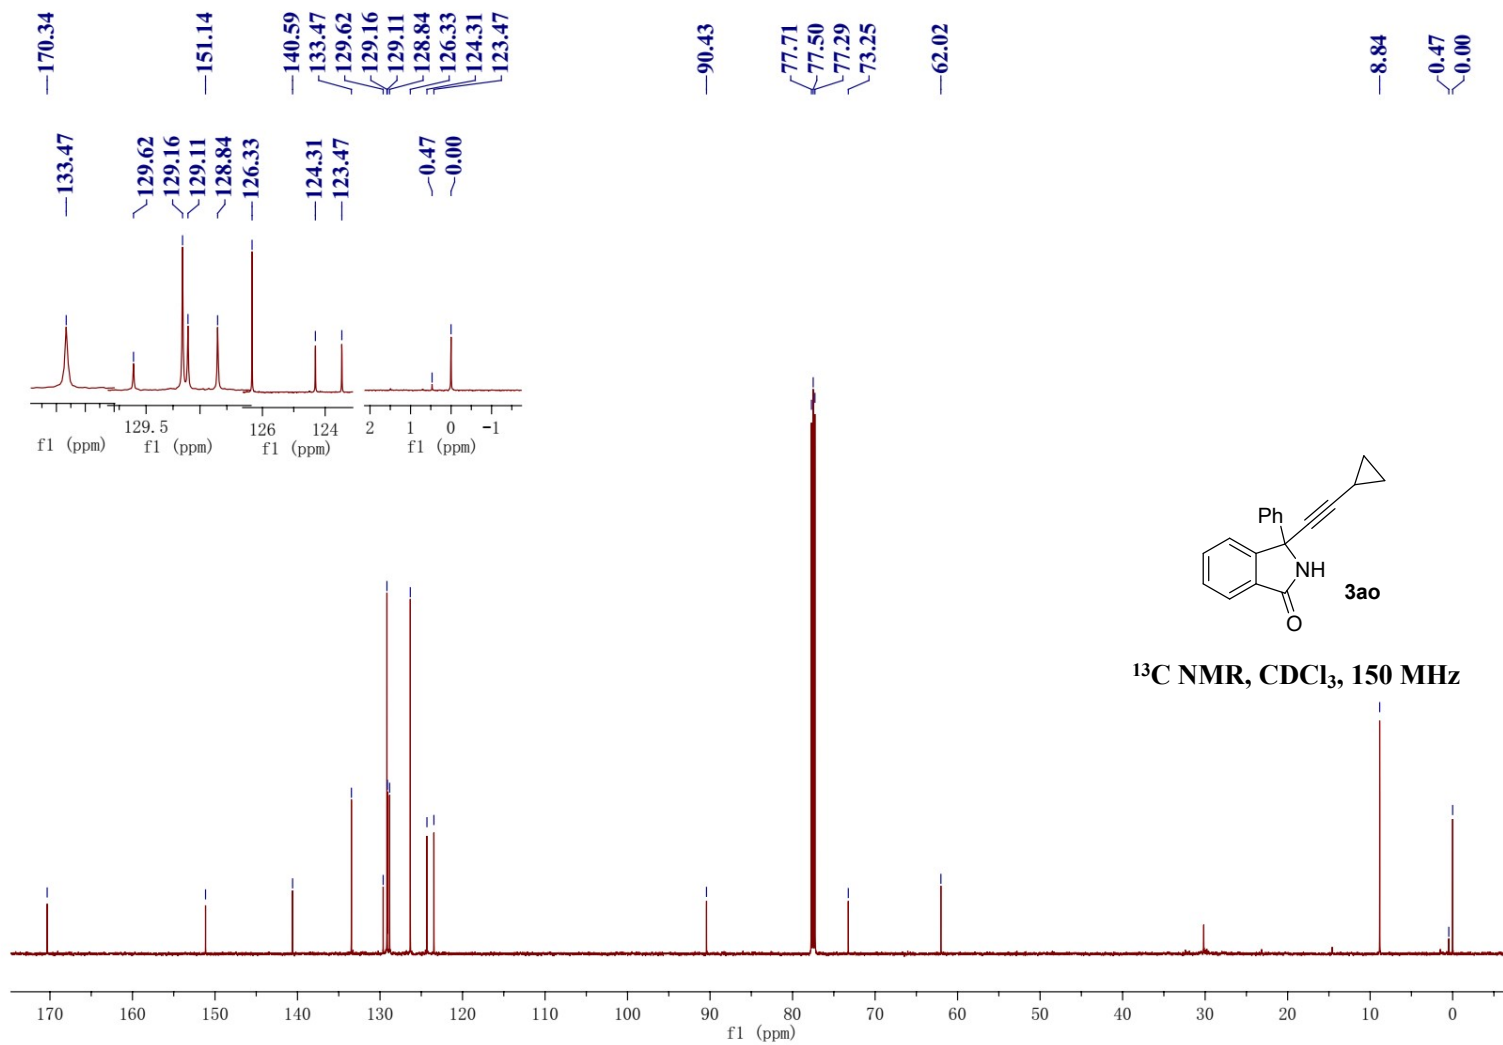

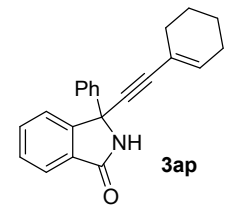

**<sup>1</sup>H NMR, CDCl<sub>3</sub>, 600 MHz**

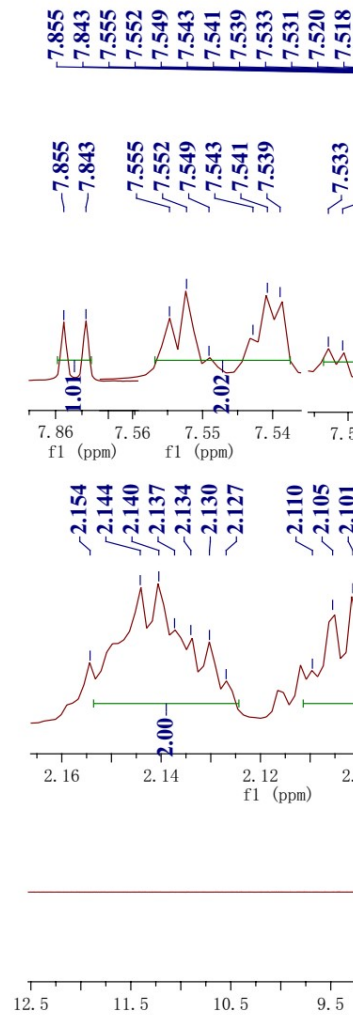

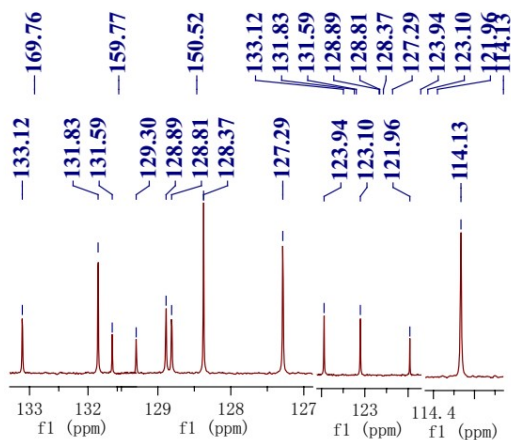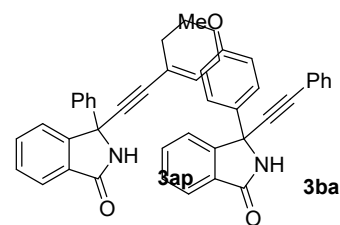

<sup>13</sup>C NMR, CDCl<sub>3</sub>, 150 MHz

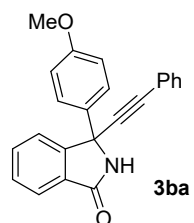

<sup>1</sup>H NMR, CDCl<sub>3</sub>, 600 MHz

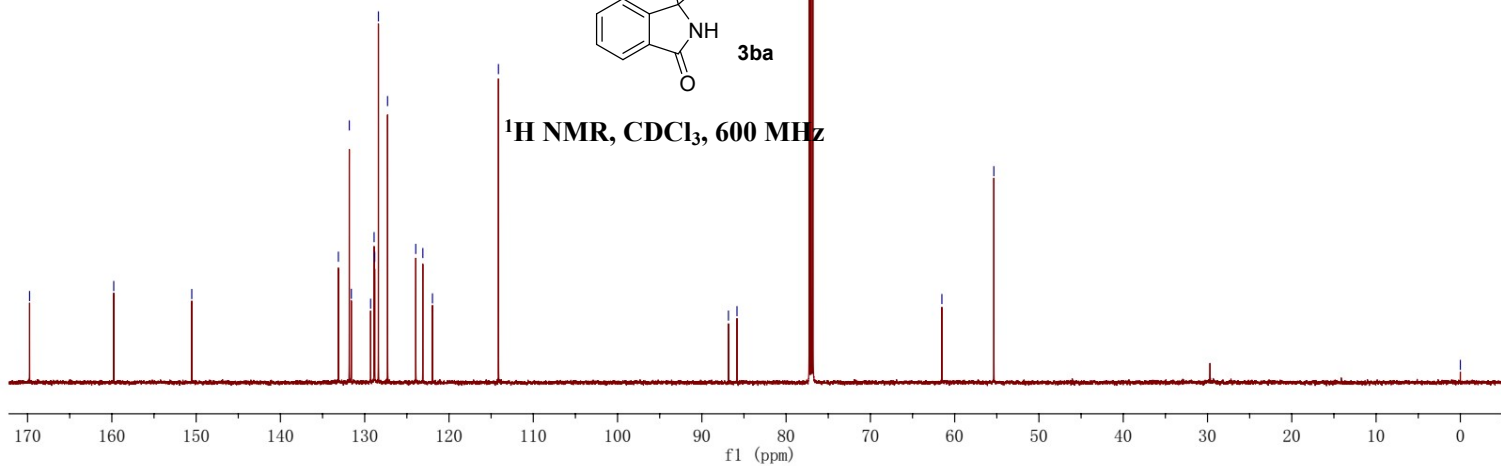

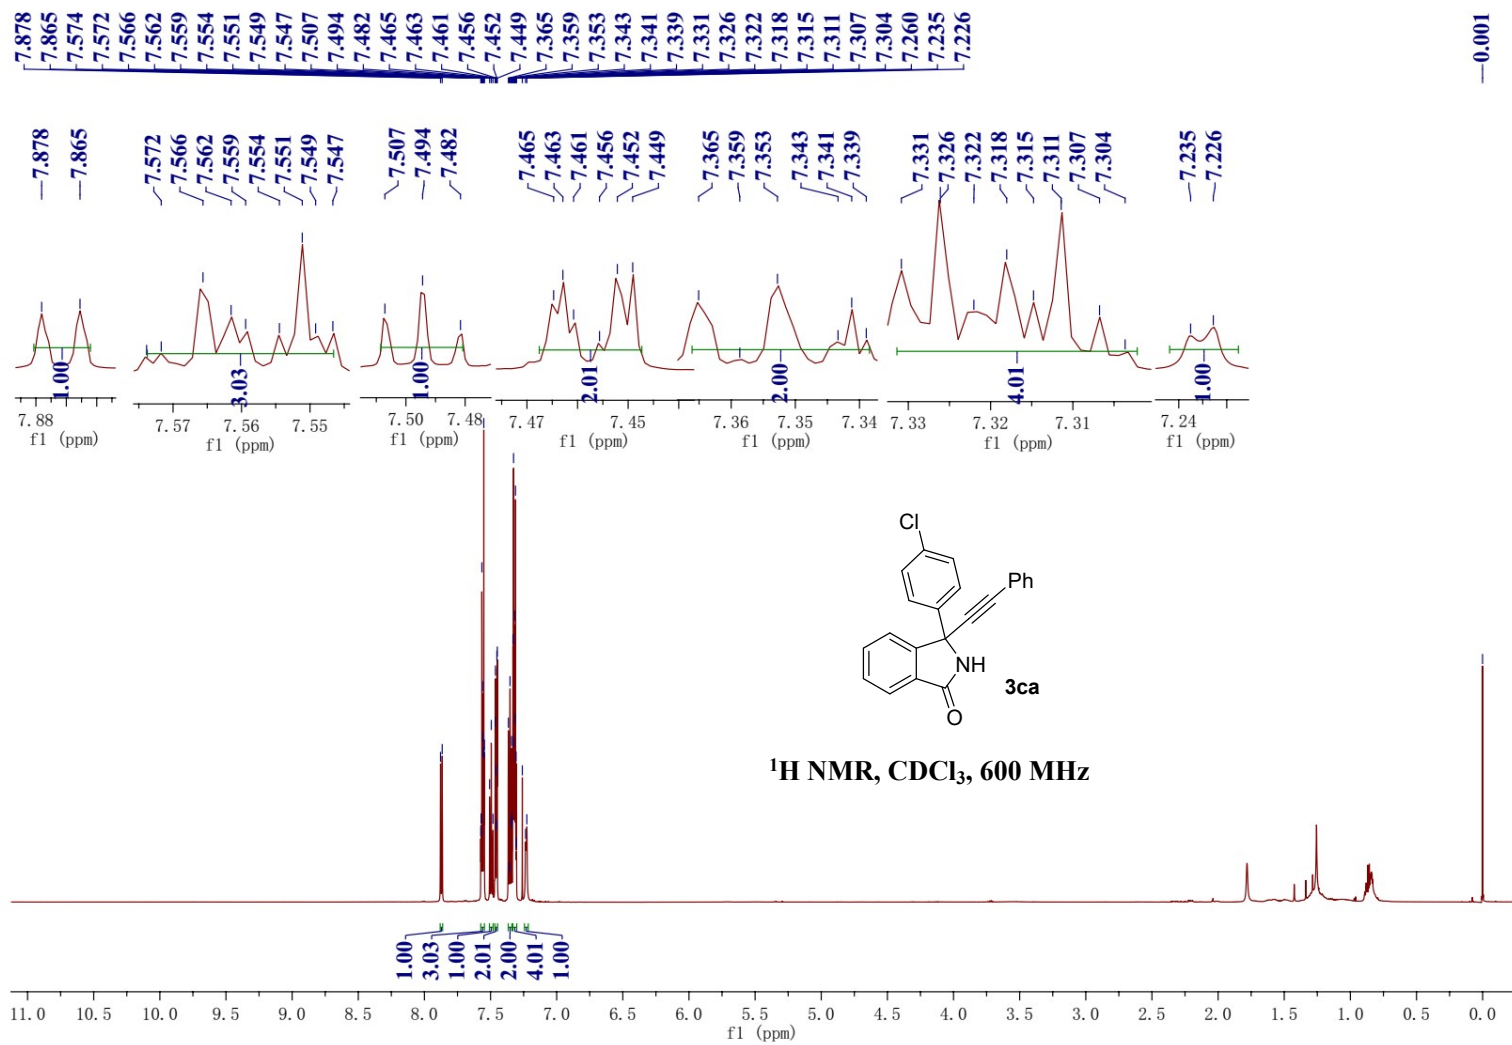



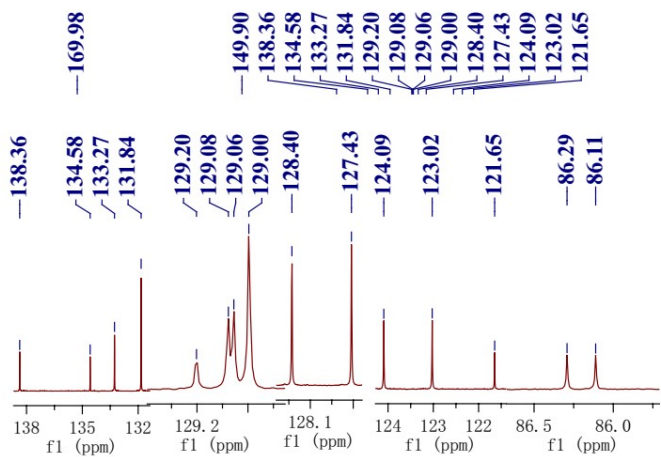

86.29, 86.11, 77.24, 77.03, 76.82

61.44

0.01

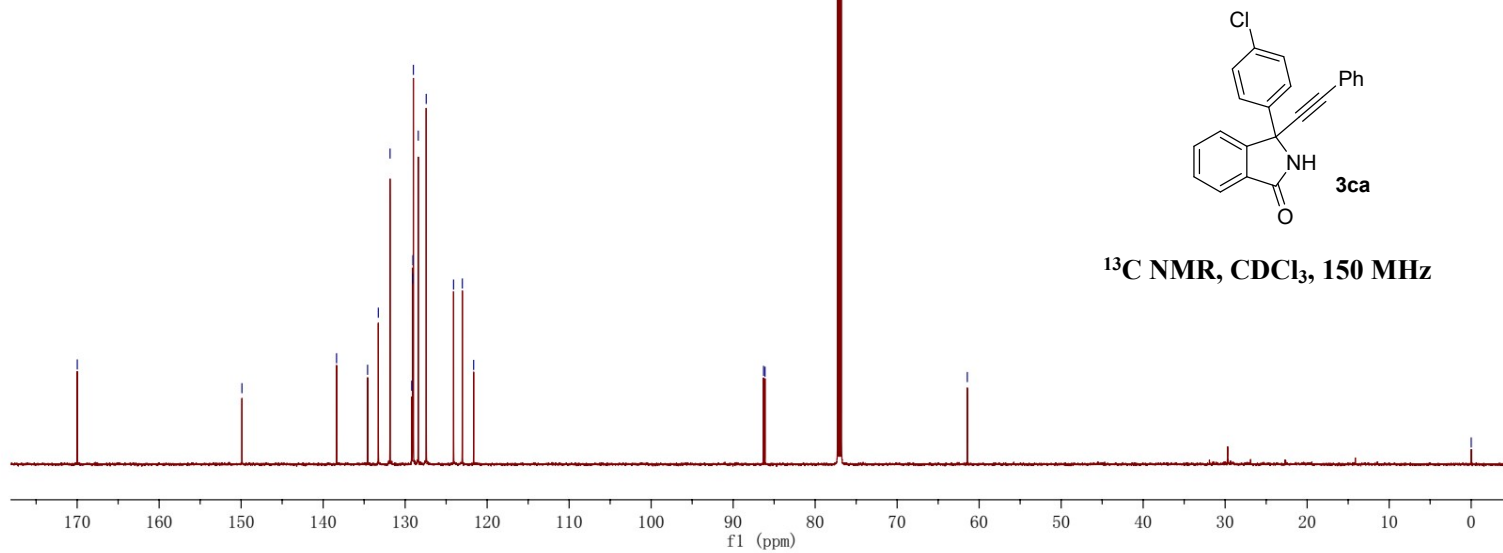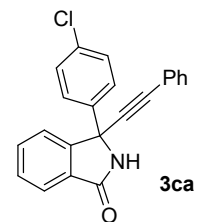

<sup>13</sup>C NMR, CDCl<sub>3</sub>, 150 MHz

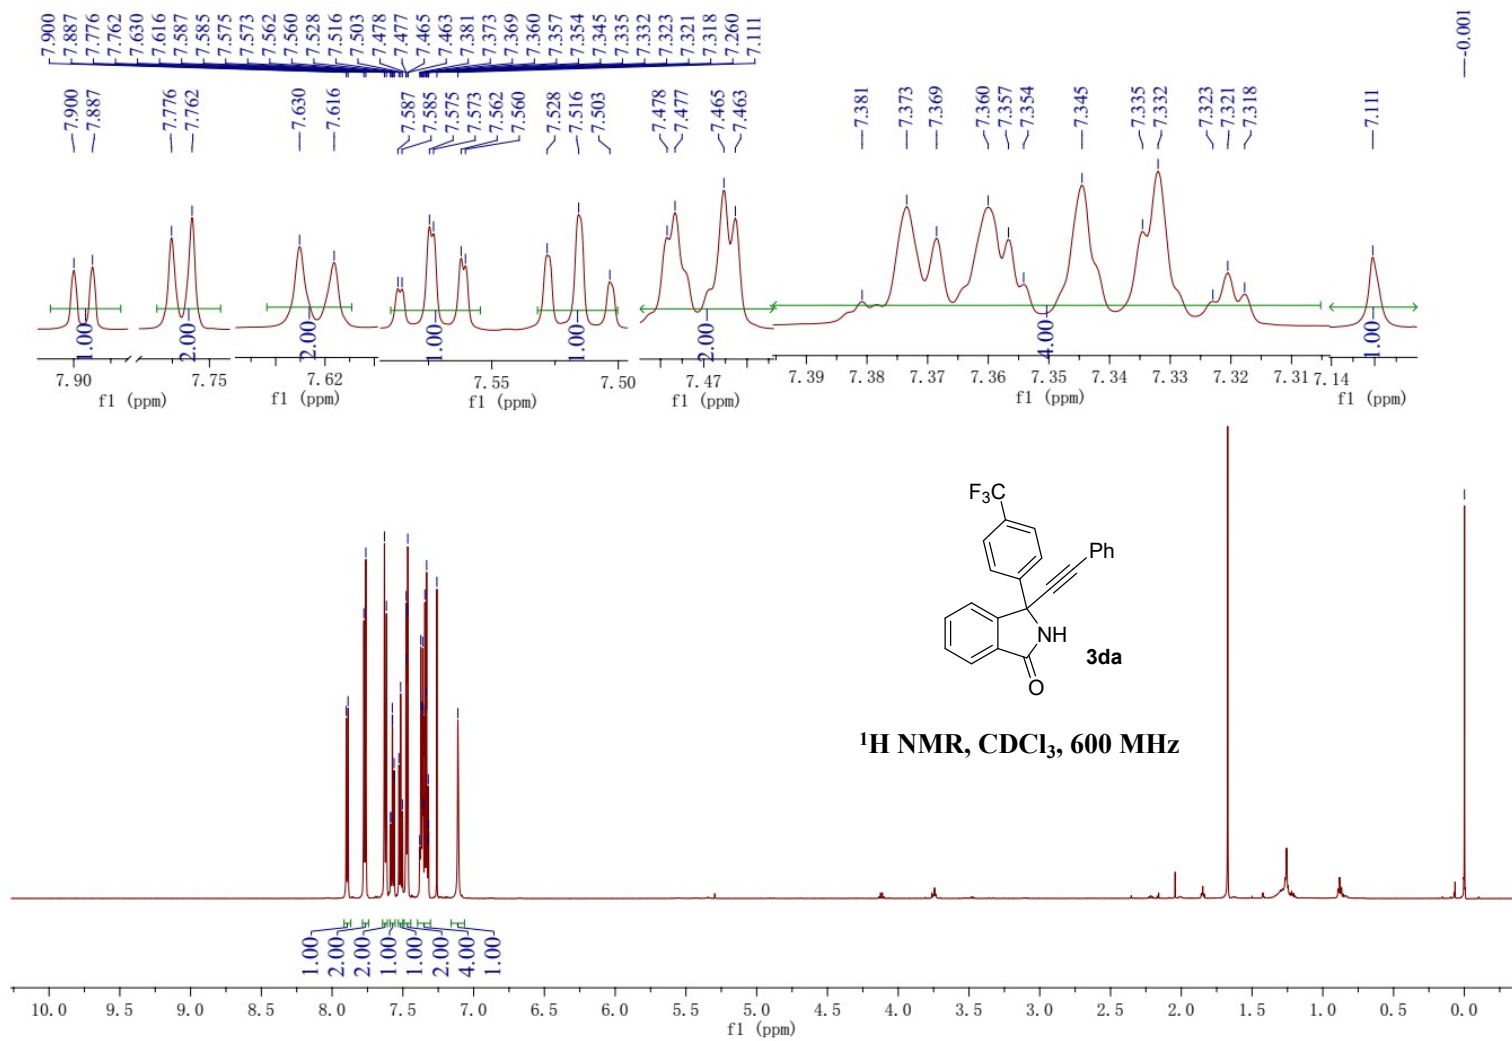

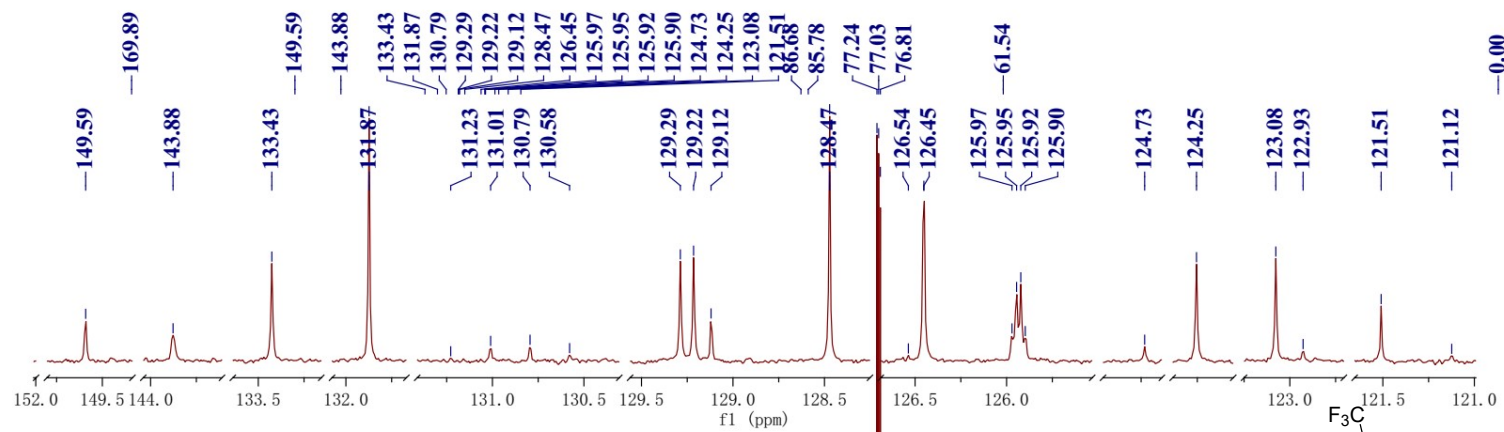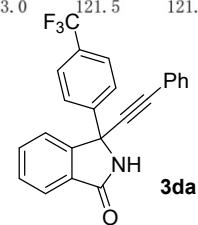

**$^{13}\text{C}$  NMR,  $\text{CDCl}_3$ , 150 MHz**

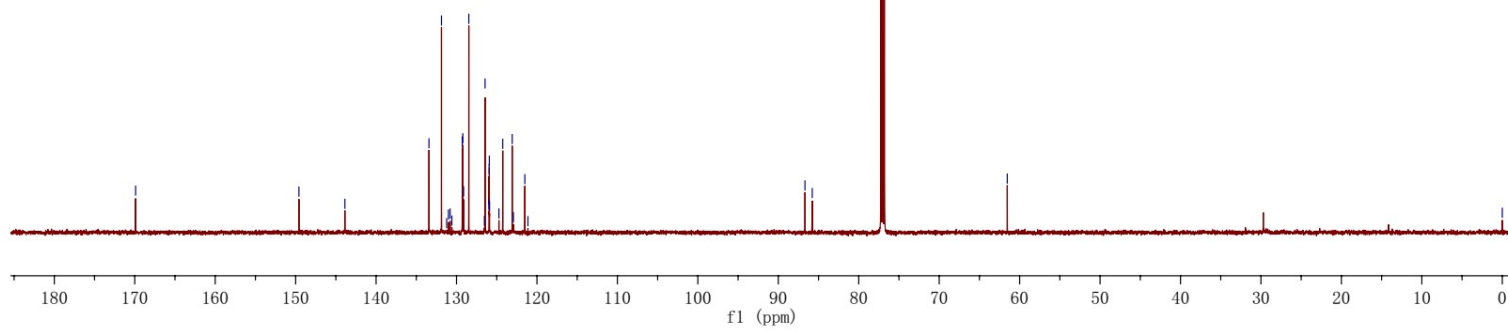

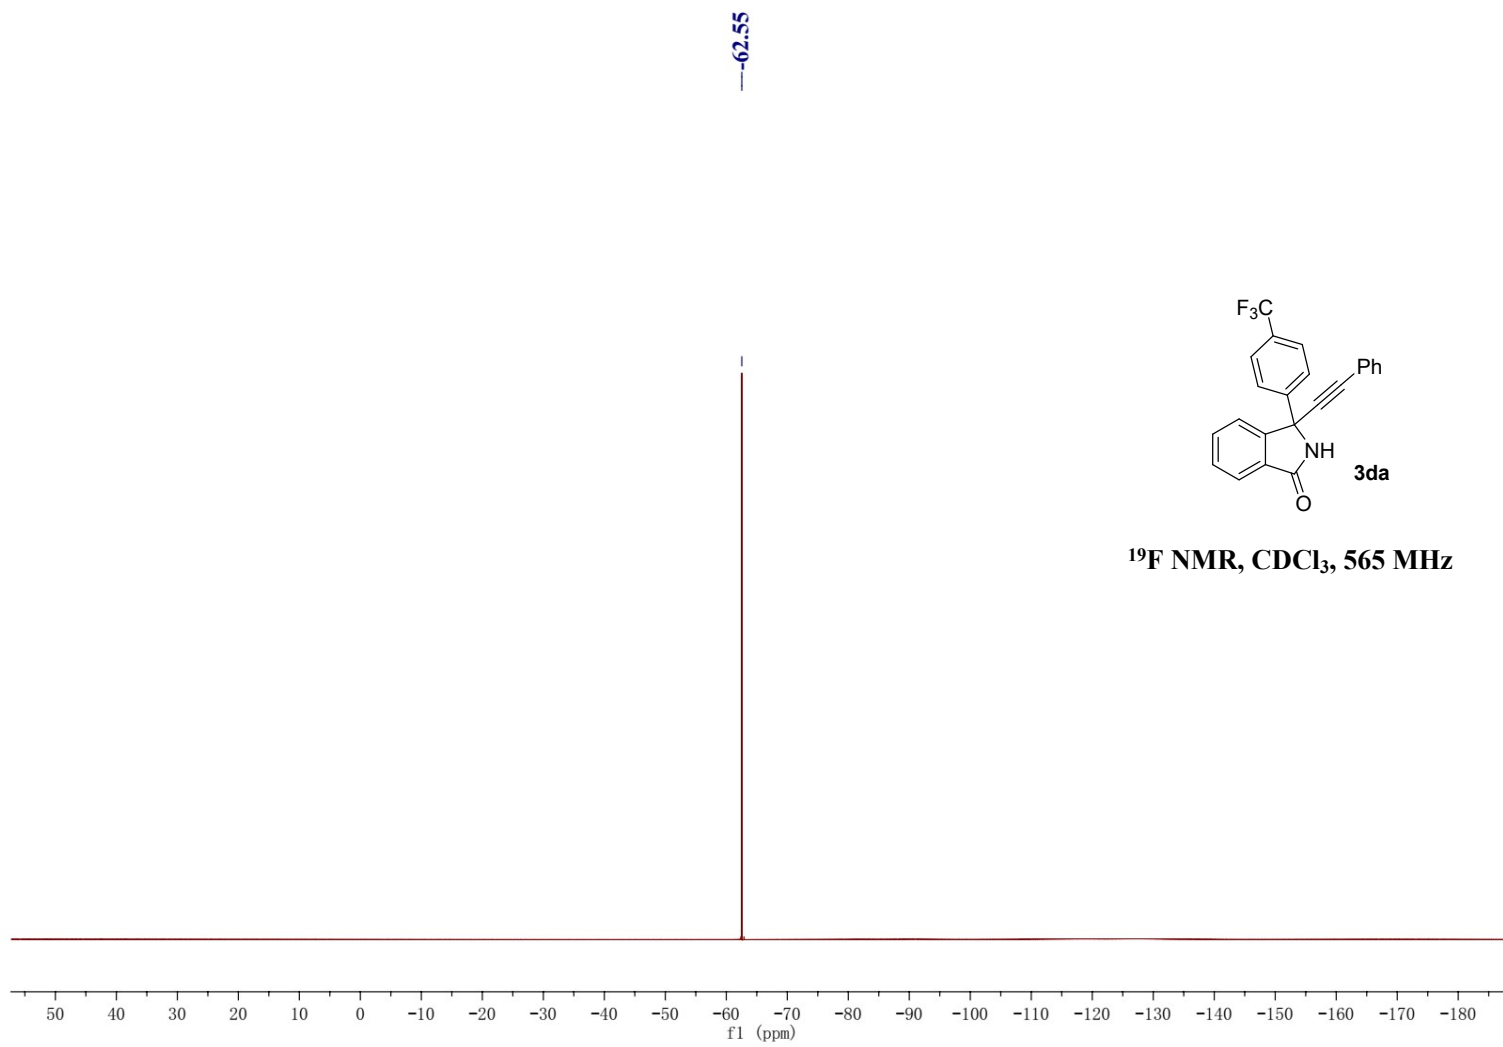

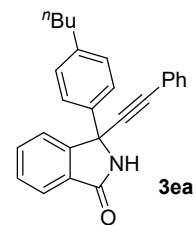

<sup>1</sup>H NMR, CDCl<sub>3</sub>, 600 MHz

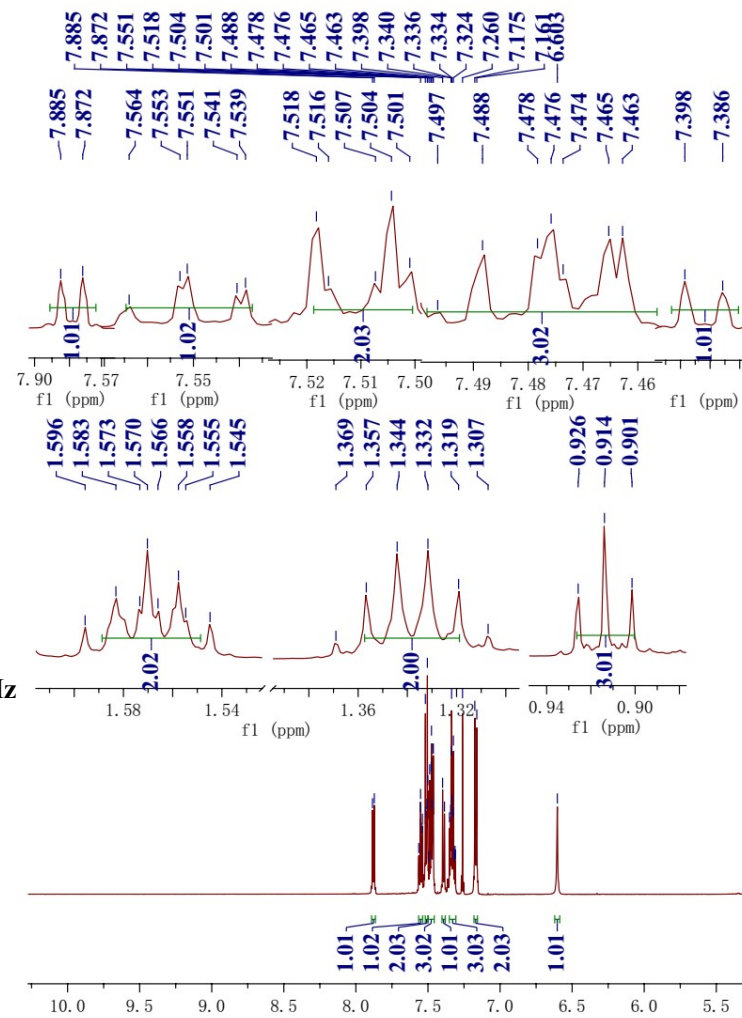

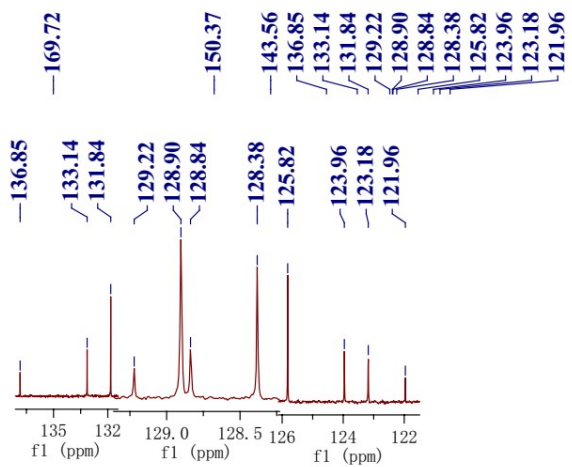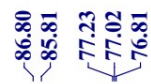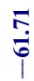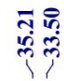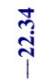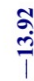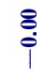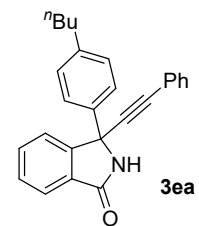

**<sup>13</sup>C NMR, CDCl<sub>3</sub>, 150 MHz**

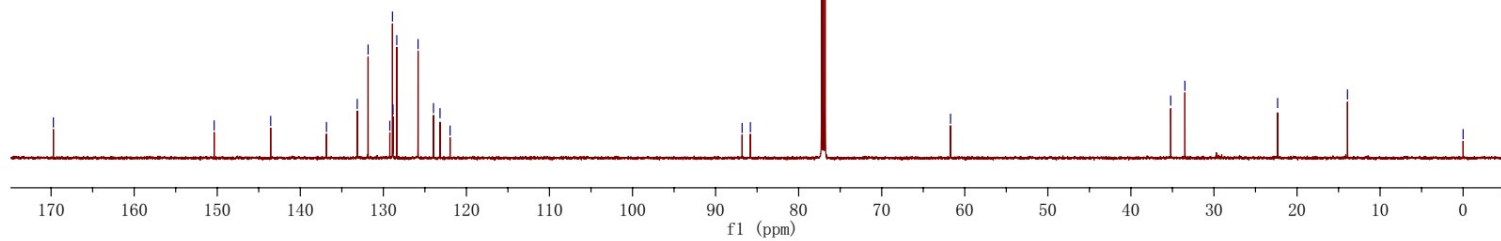

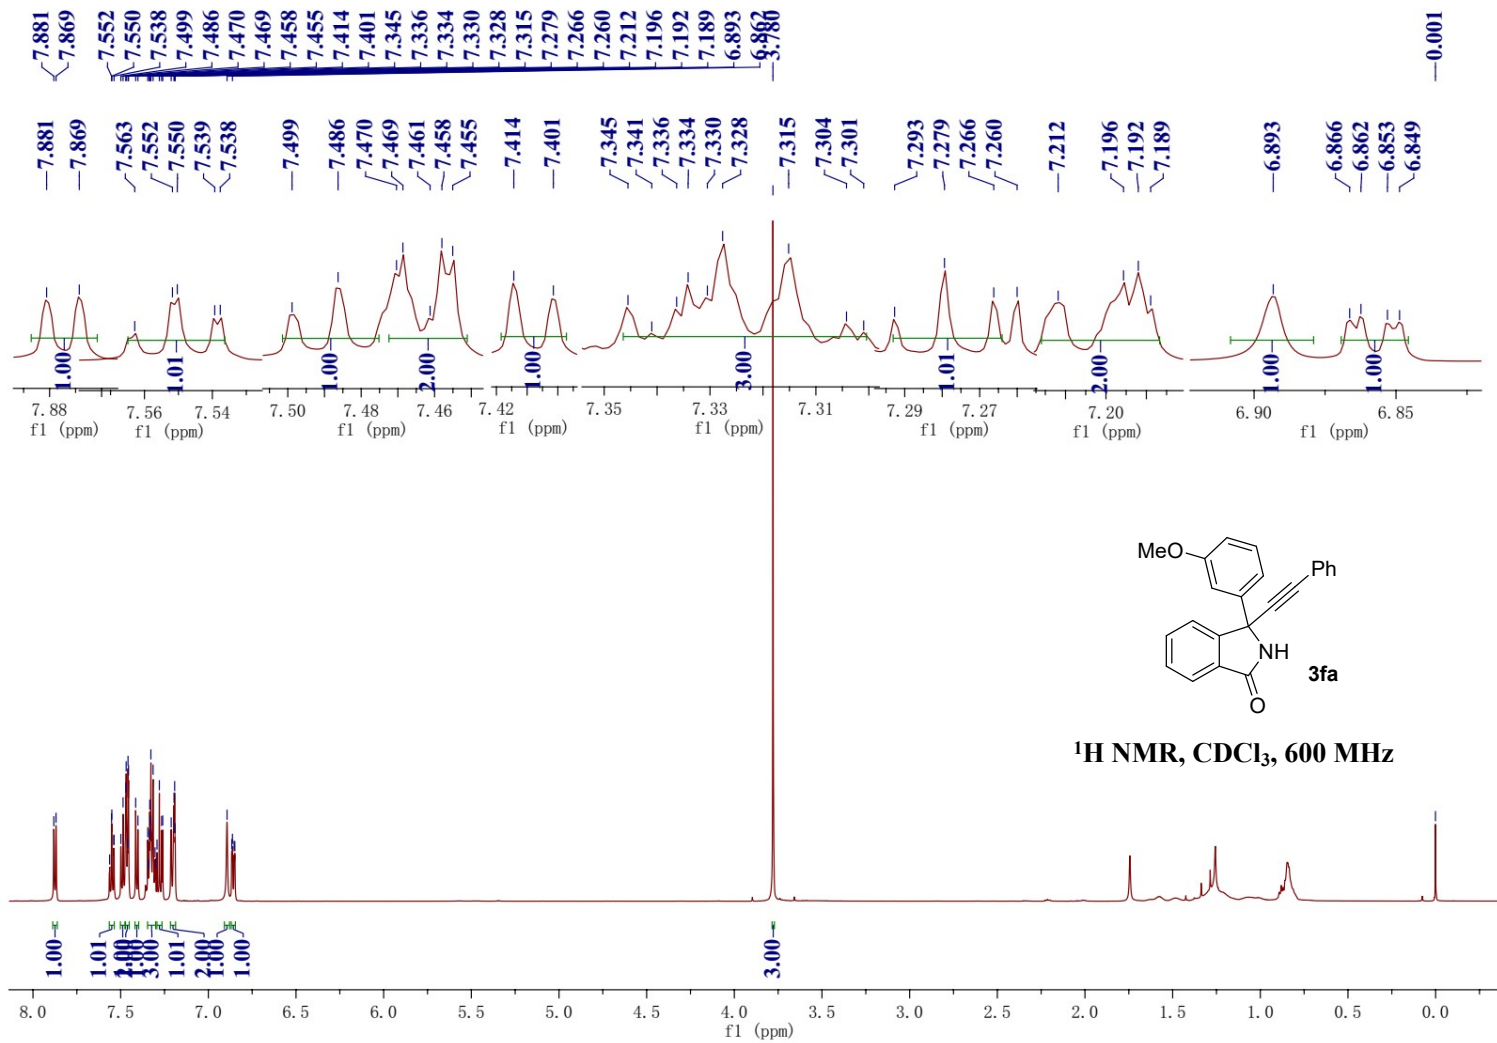

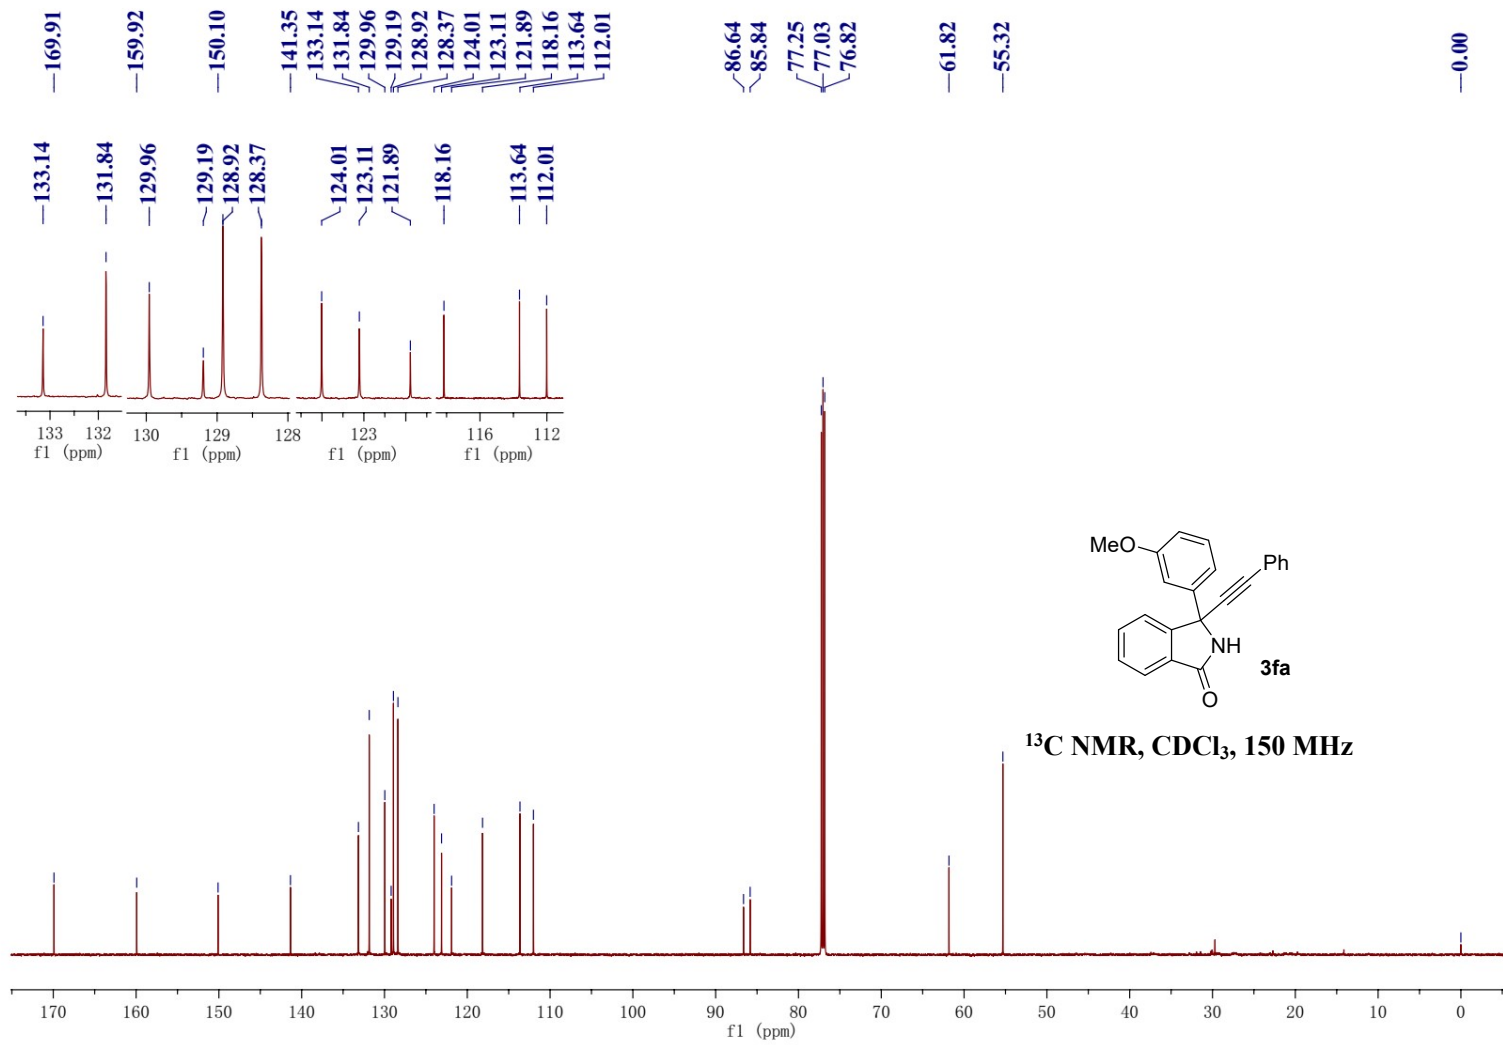



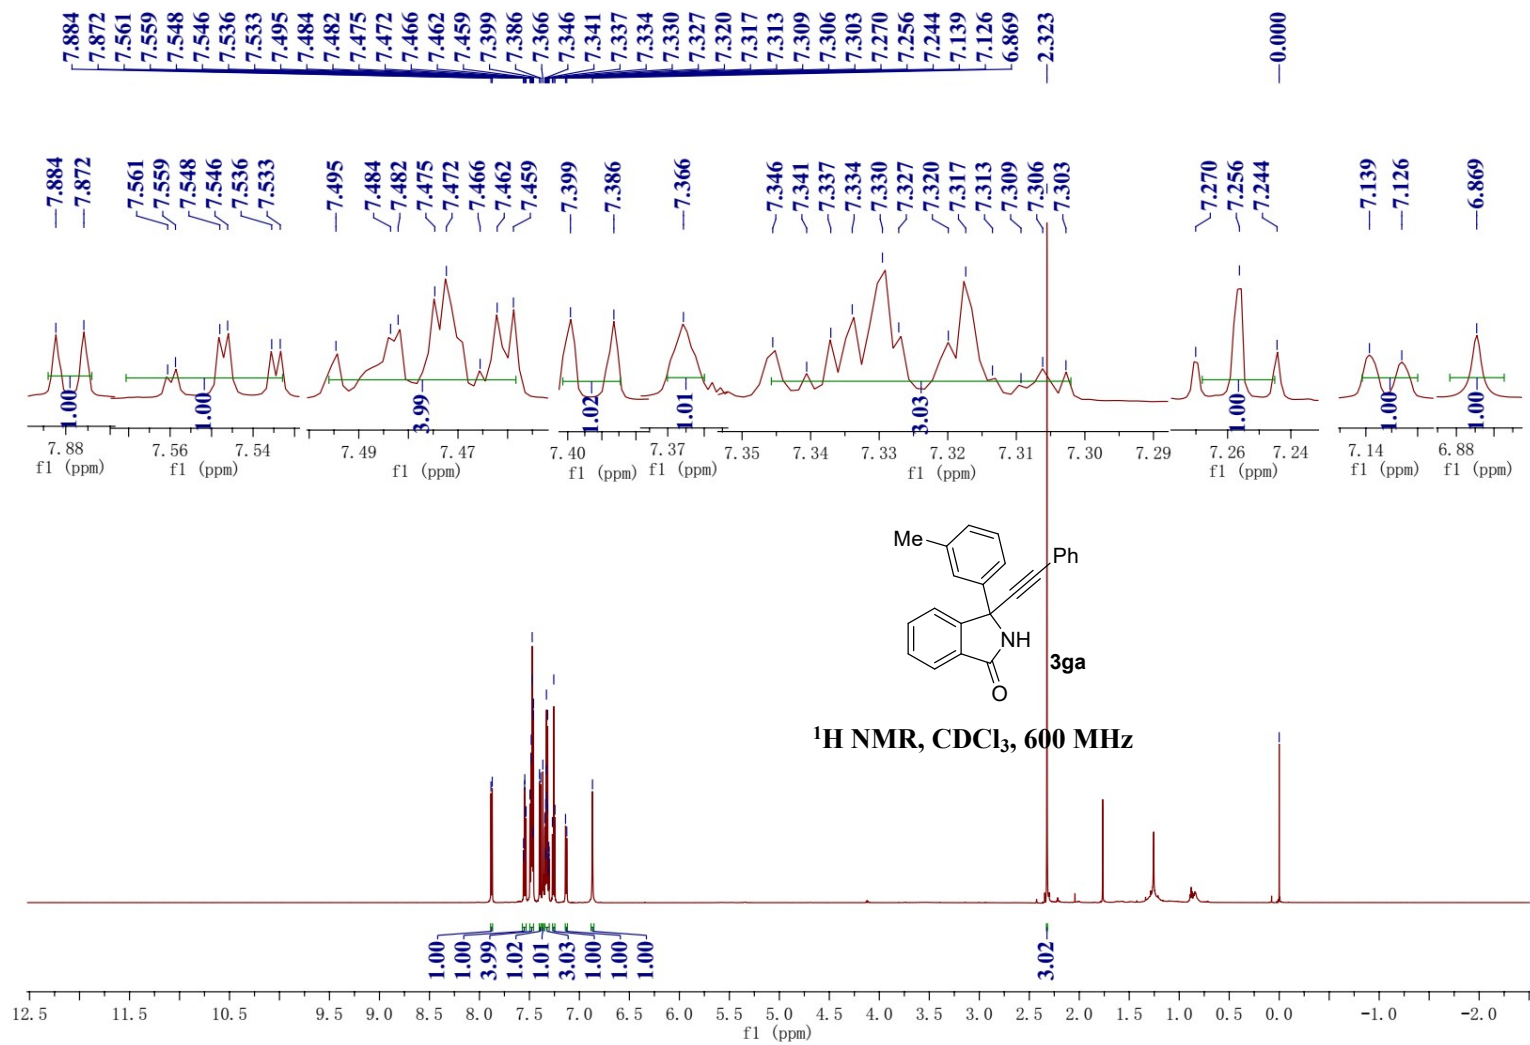

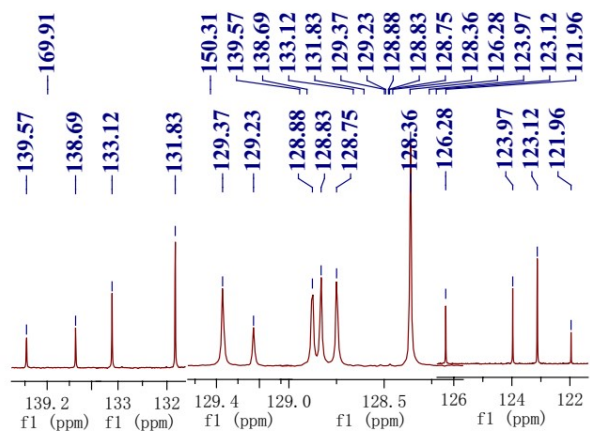

86.77, 85.79, 77.24, 77.03, 76.82

61.86

21.52

0.01

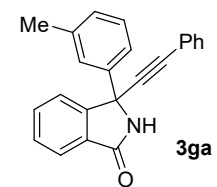

$^{13}\text{C}$  NMR,  $\text{CDCl}_3$ , 150 MHz

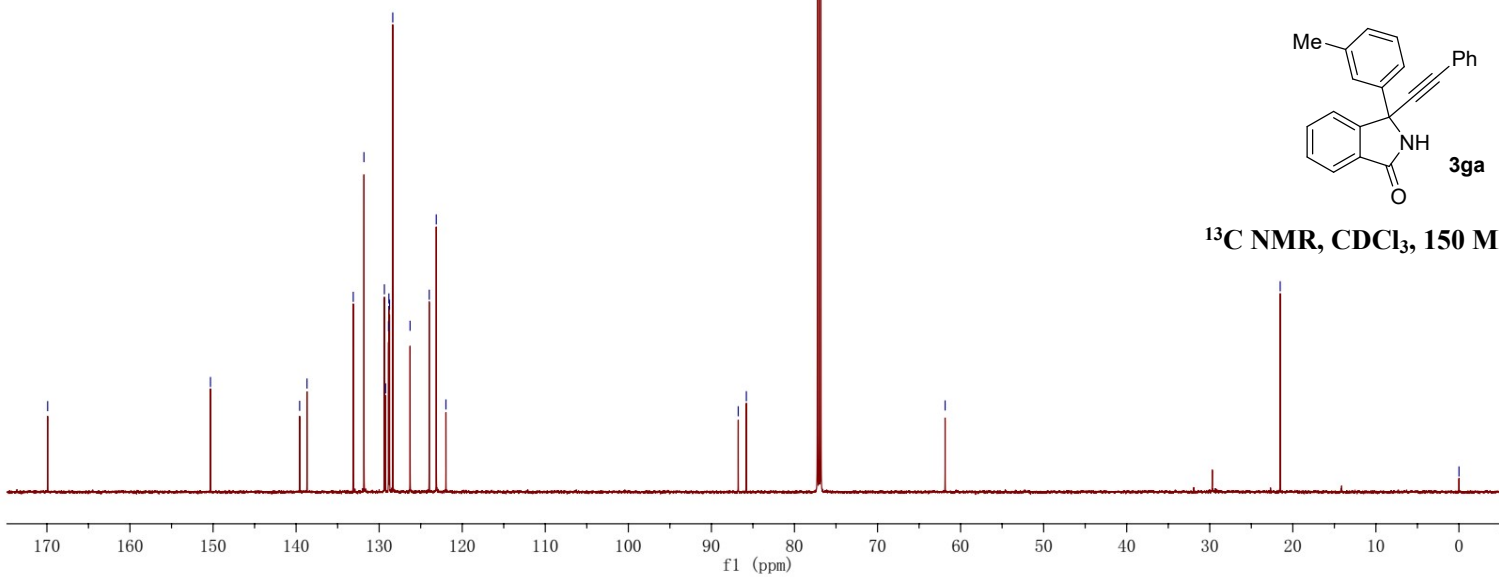

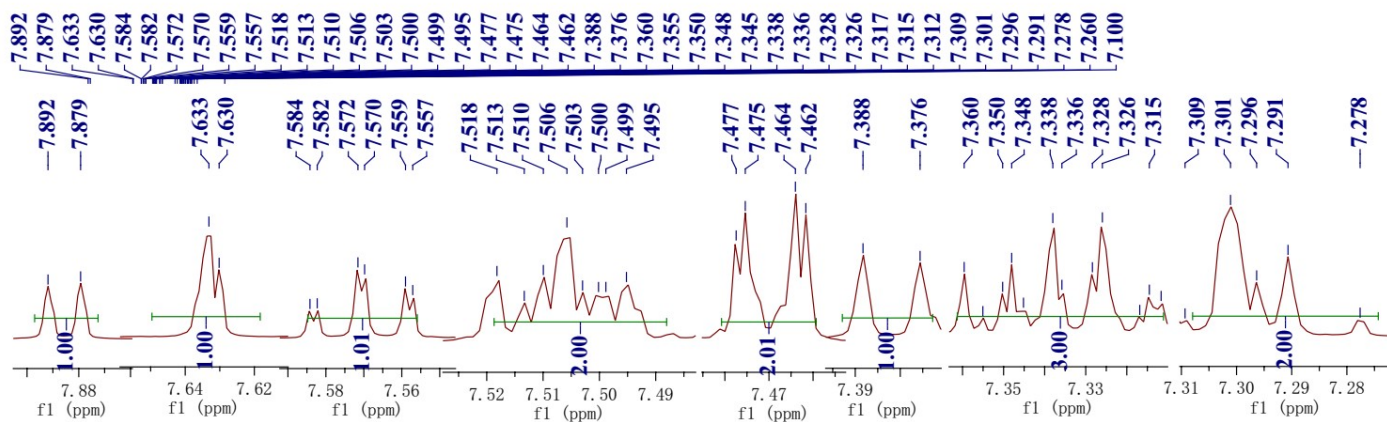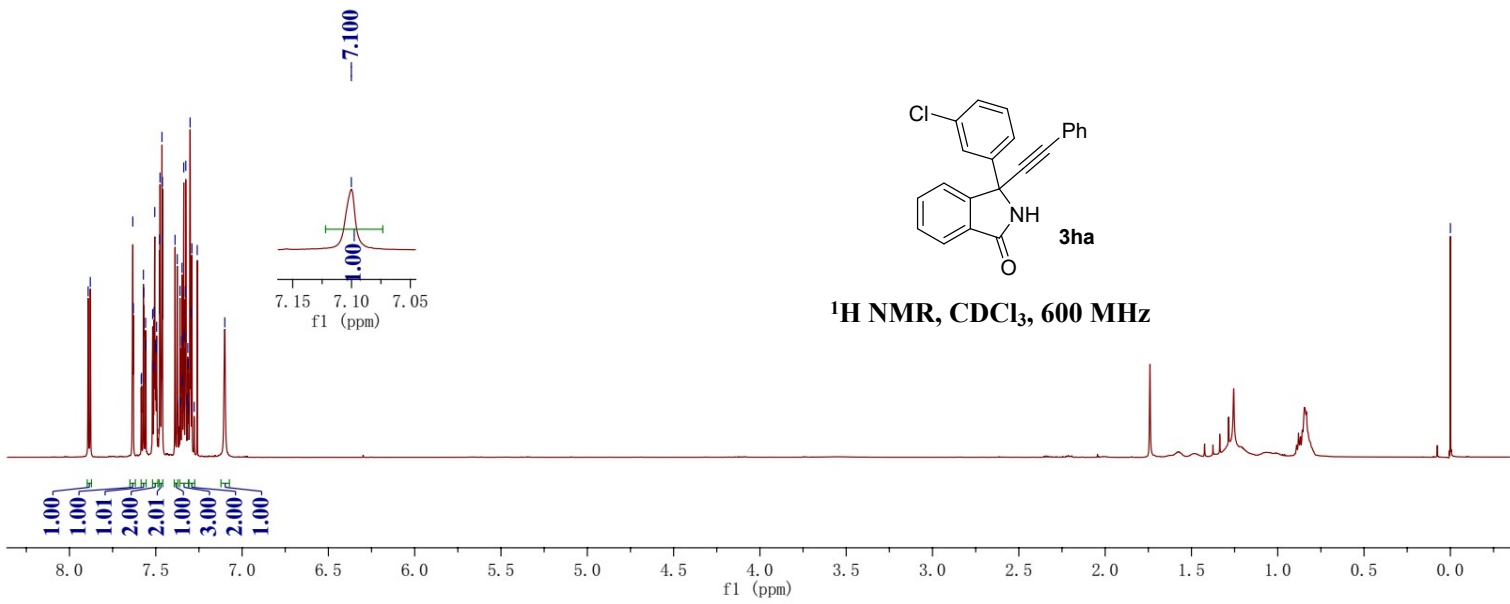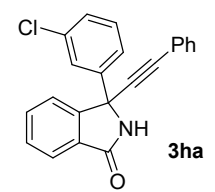

<sup>1</sup>H NMR, CDCl<sub>3</sub>, 600 MHz

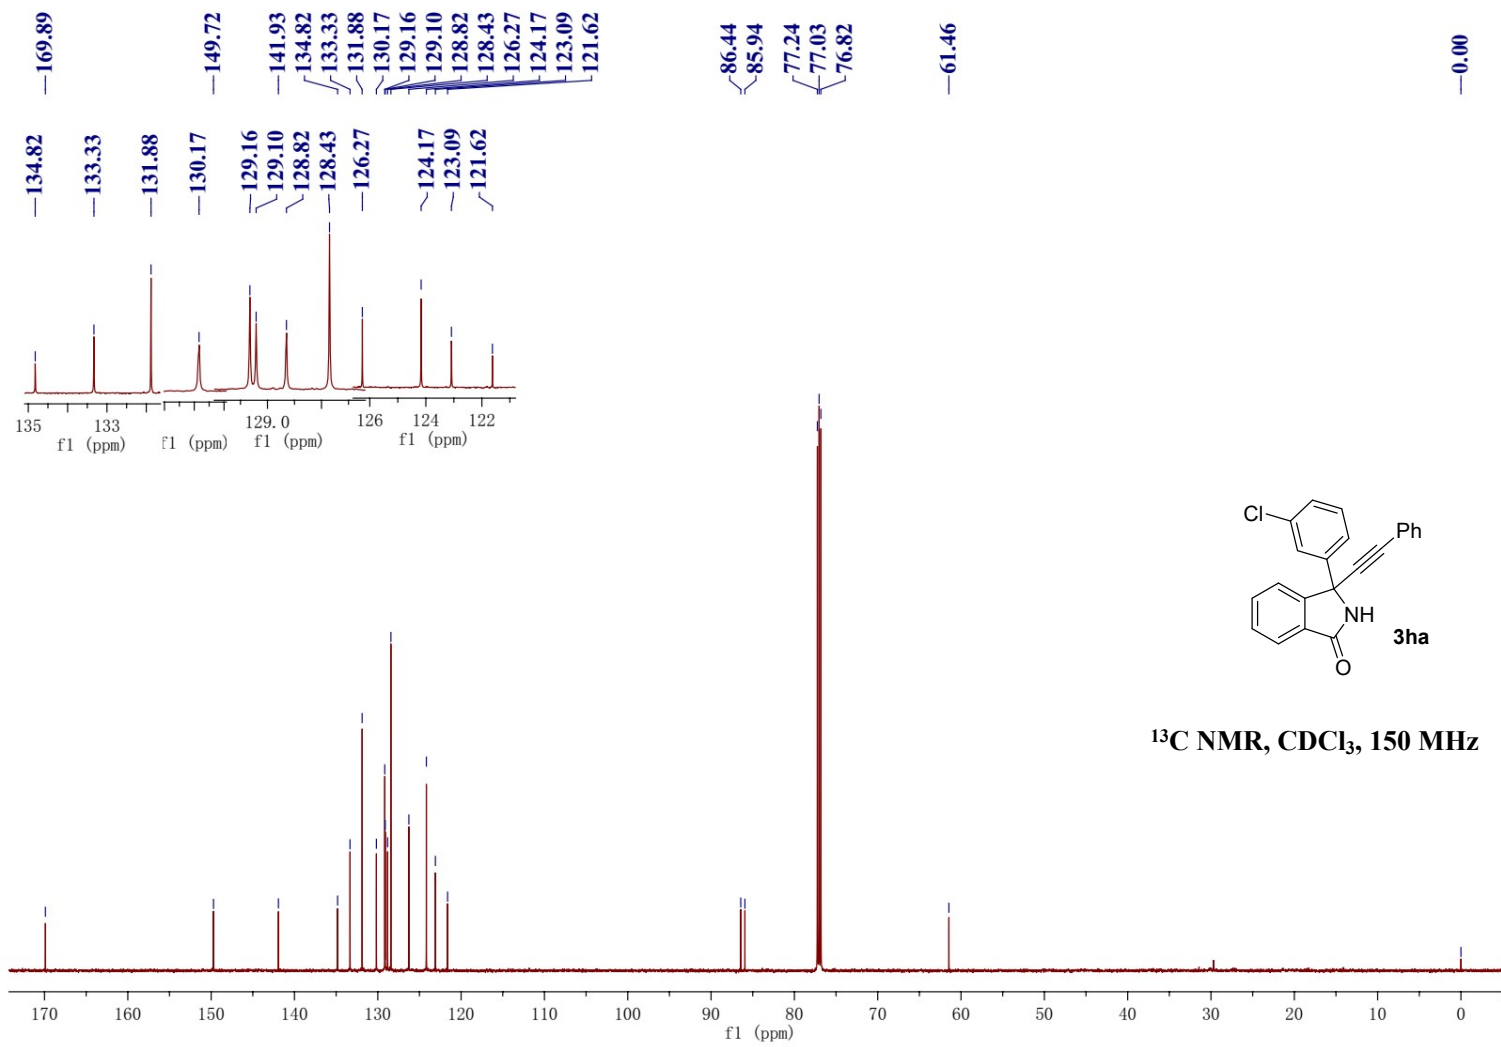

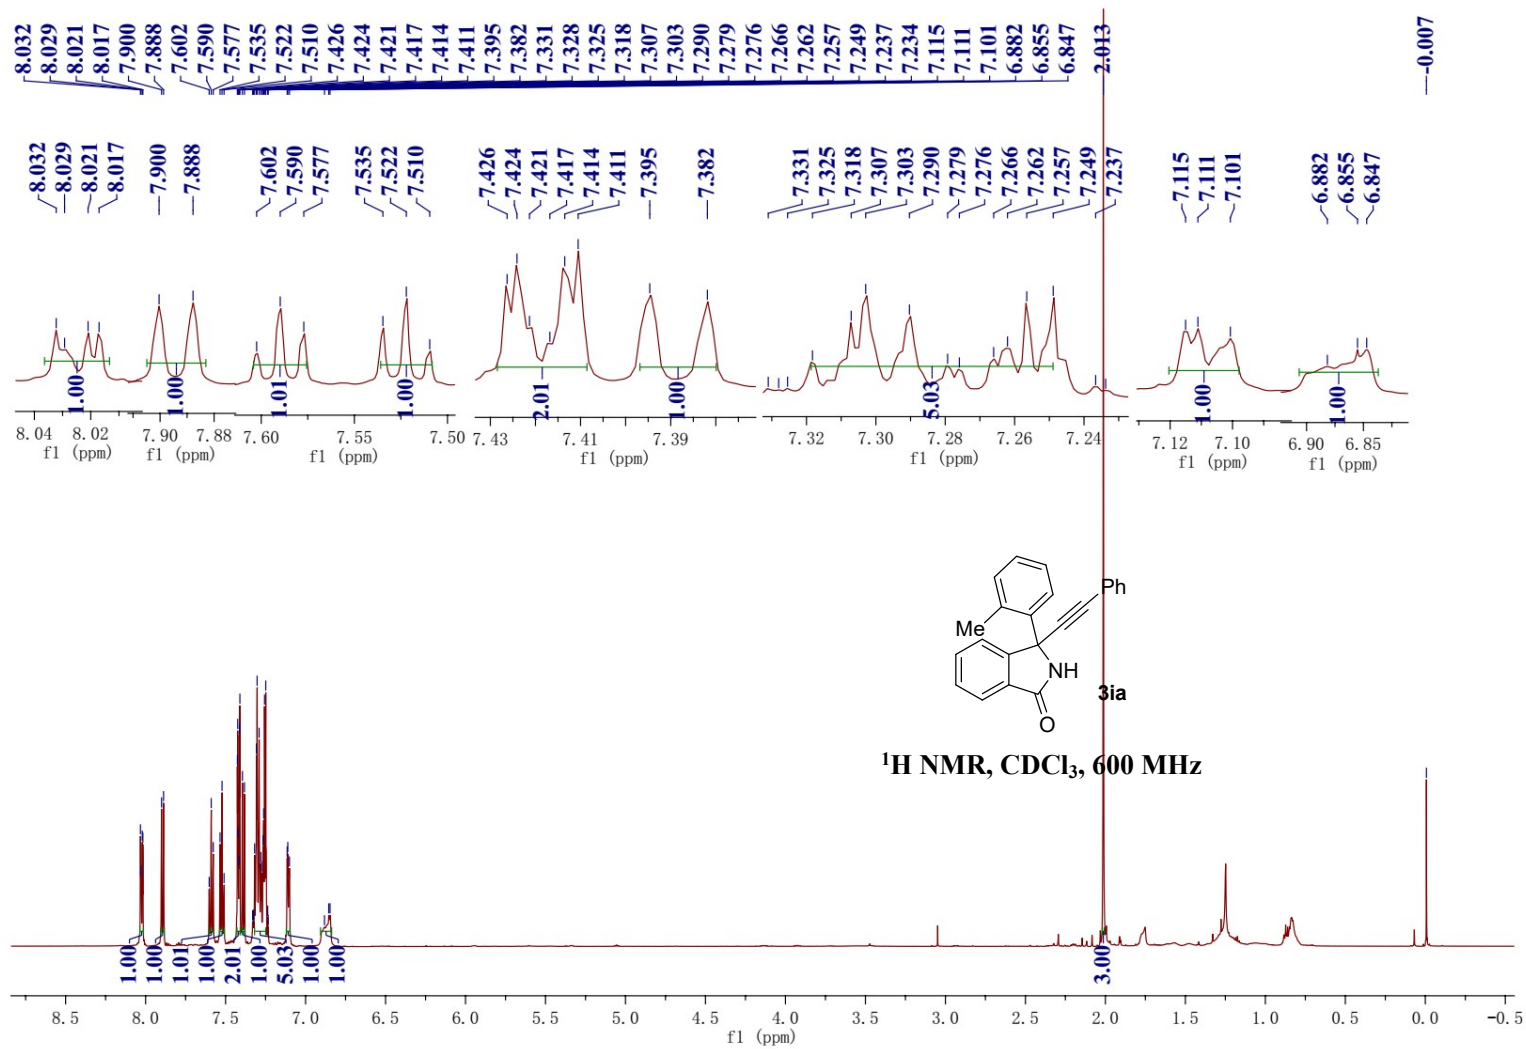

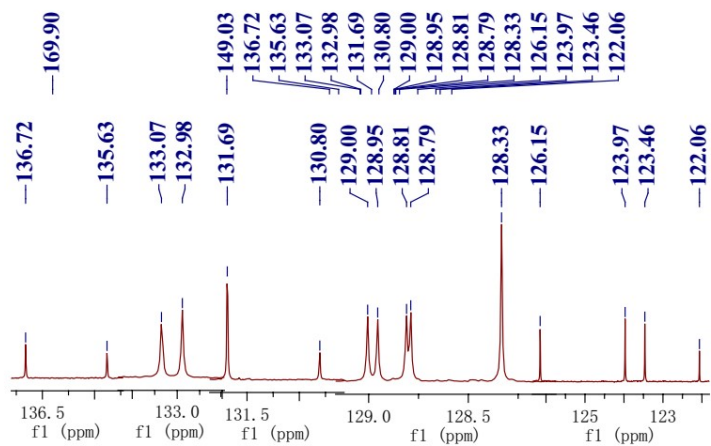

136.5 f1 (ppm) 133.0 f1 (ppm) 131.5 f1 (ppm) 129.0 f1 (ppm) 125 f1 (ppm) 123

169.90  
149.03  
136.72  
135.63  
133.07  
132.98  
131.69  
130.80  
129.00  
128.95  
128.81  
128.79  
128.33  
126.15  
123.97  
123.46  
122.06

87.90  
86.34  
77.25  
77.03  
76.82

62.80

20.29

0.00

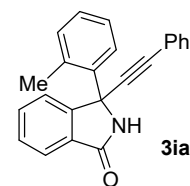

3a

<sup>13</sup>C NMR, CDCl<sub>3</sub>, 150 MHz

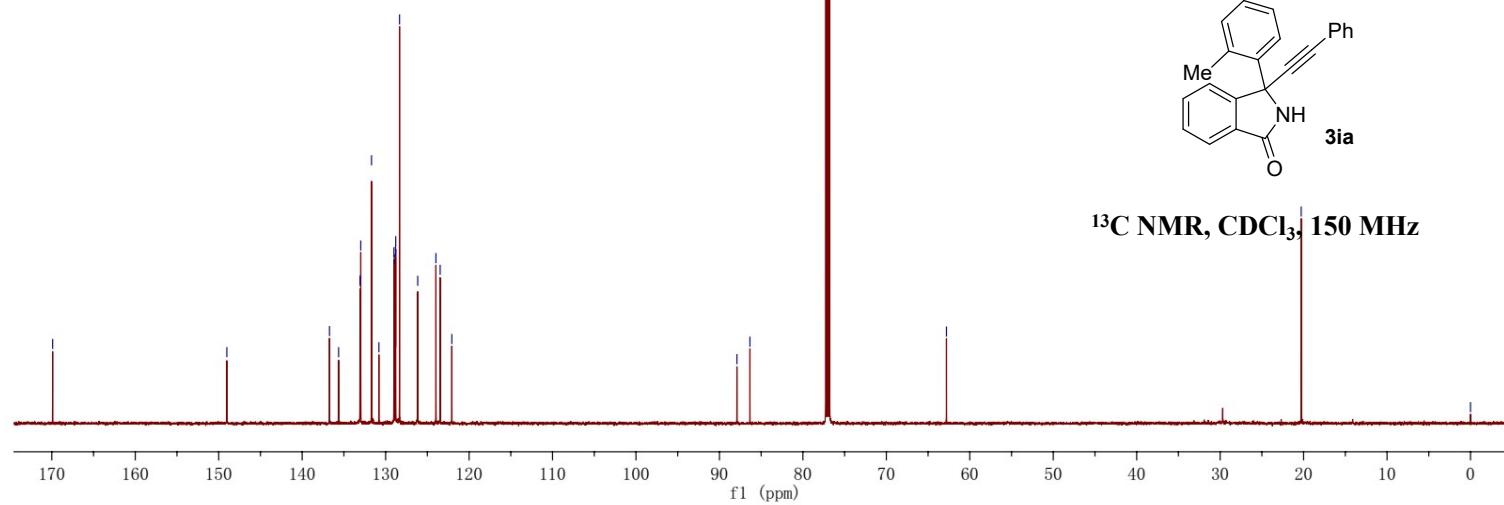

170 160 150 140 130 120 110 100 90 80 70 60 50 40 30 20 10 0

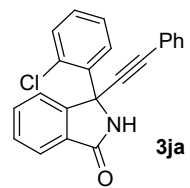

<sup>1</sup>H NMR, CDCl<sub>3</sub>, 600 MHz

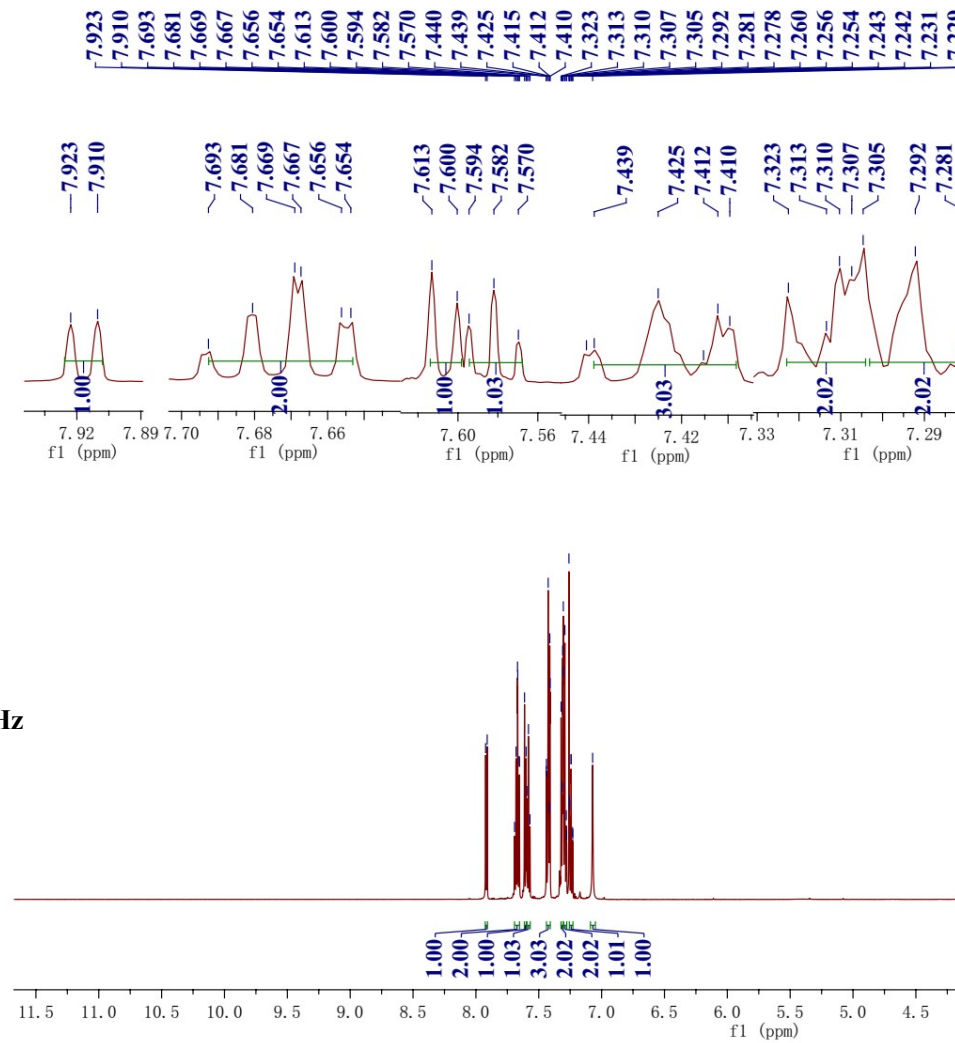

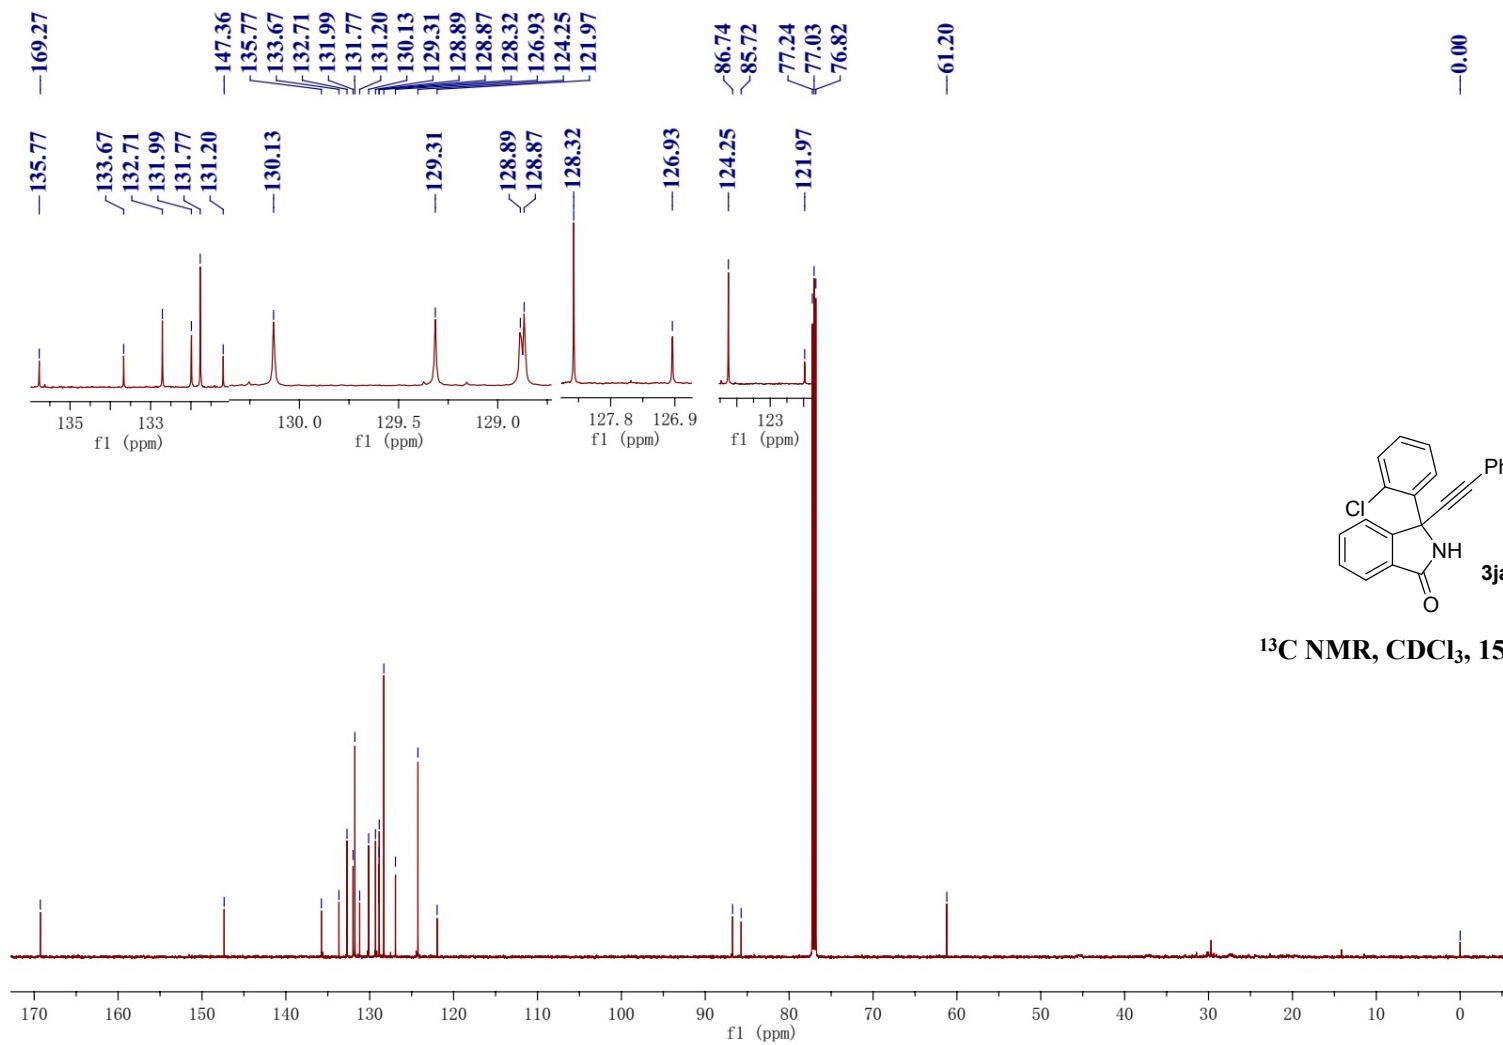



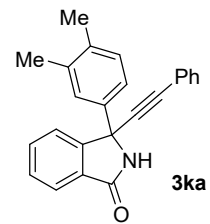

**<sup>1</sup>H NMR, CDCl<sub>3</sub>, 600 MHz**

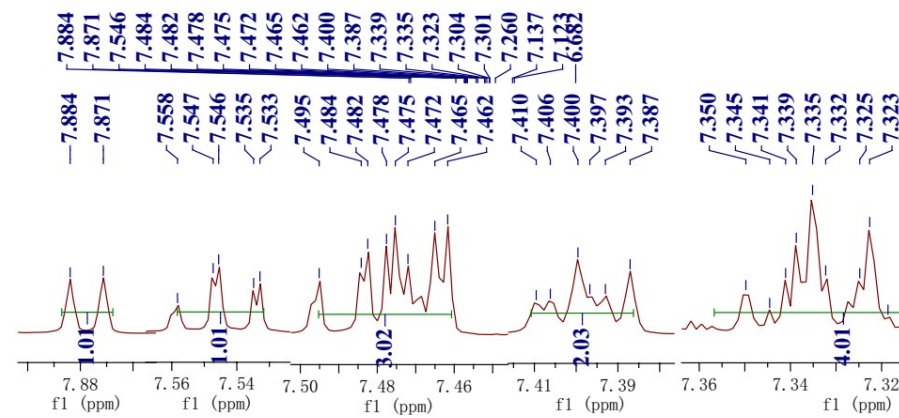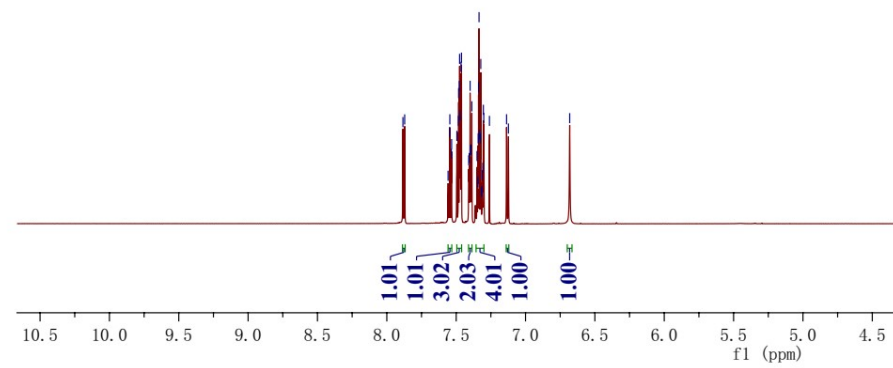

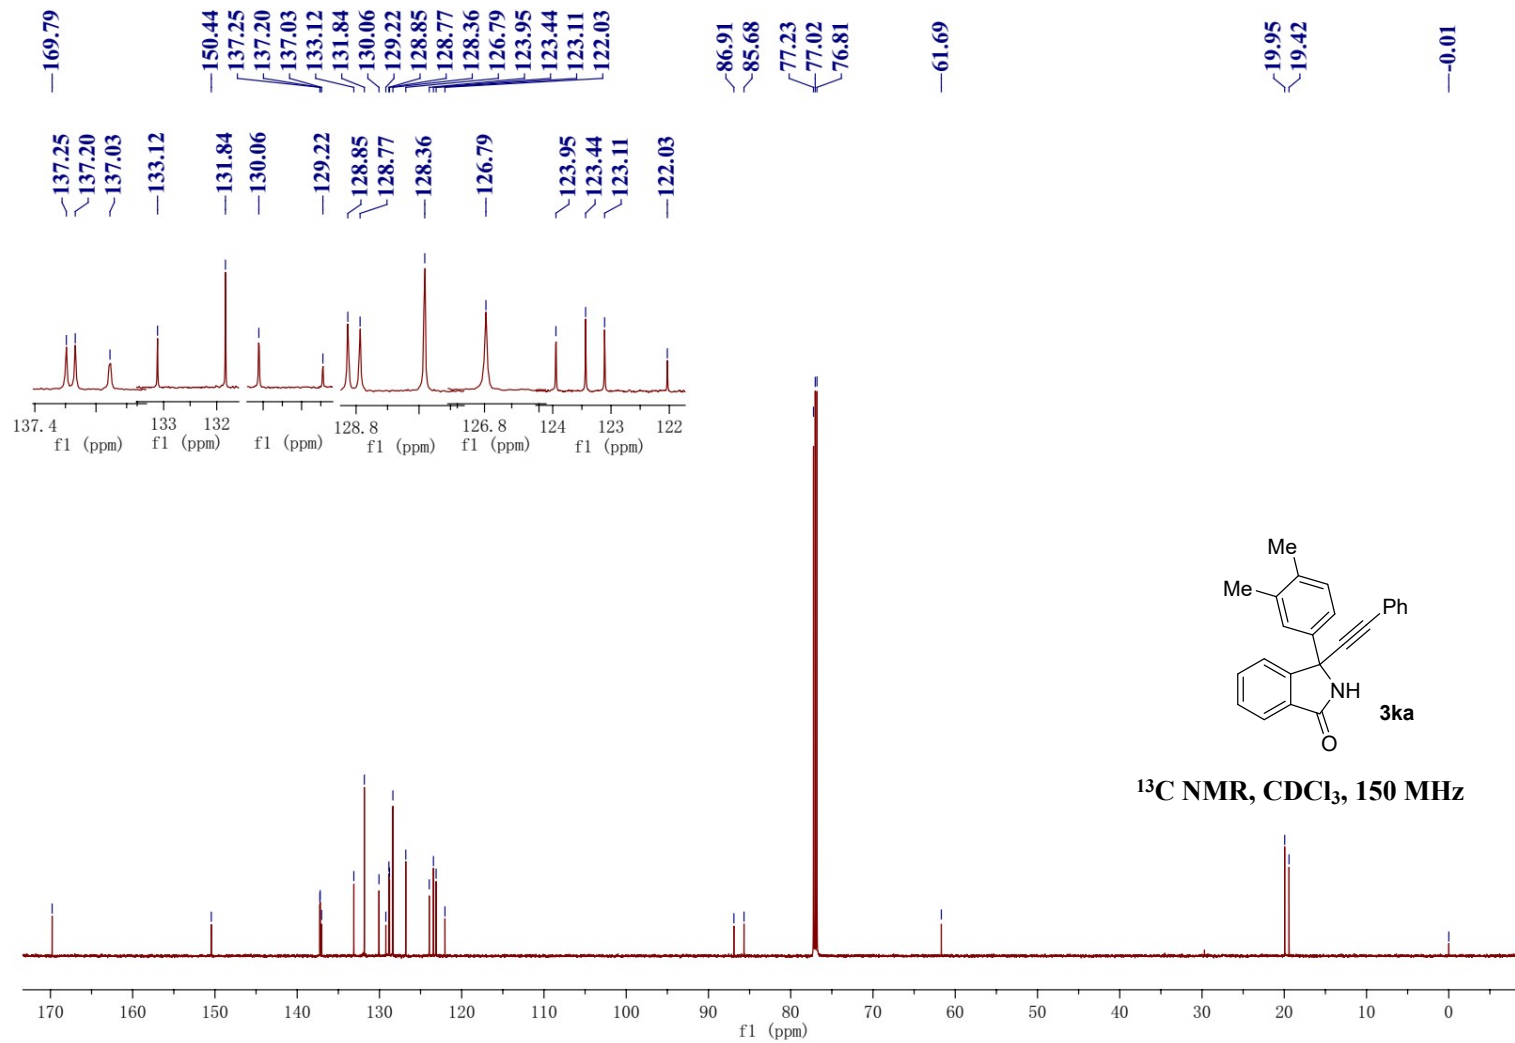

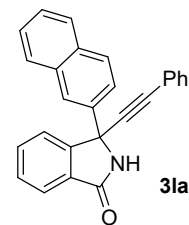

<sup>1</sup>H NMR, CDCl<sub>3</sub>, 600 MHz

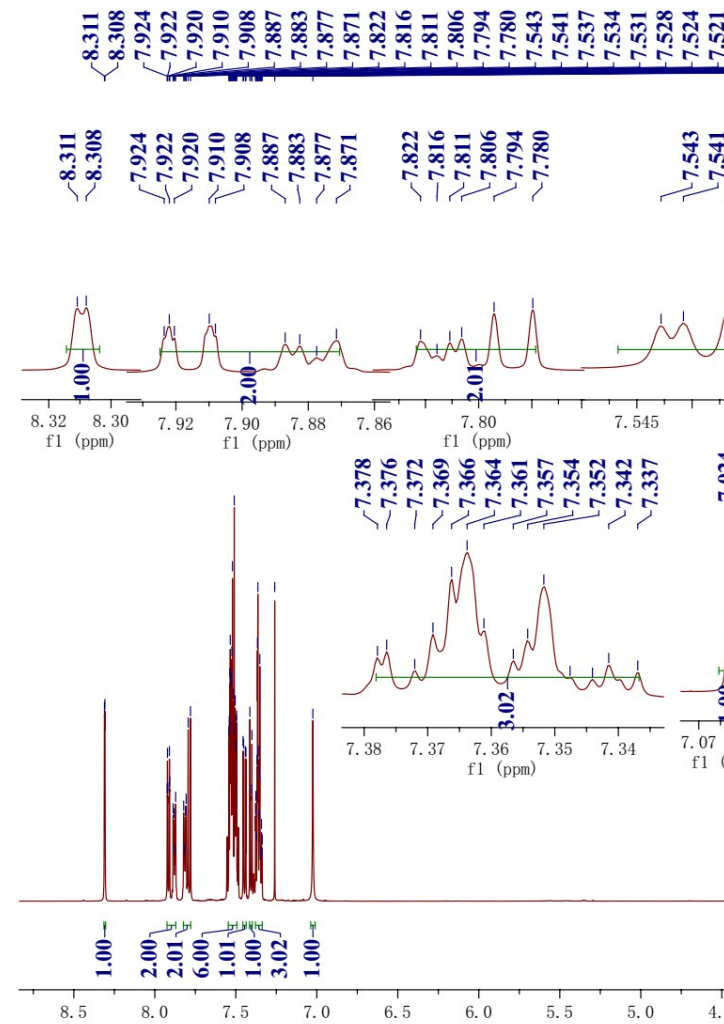



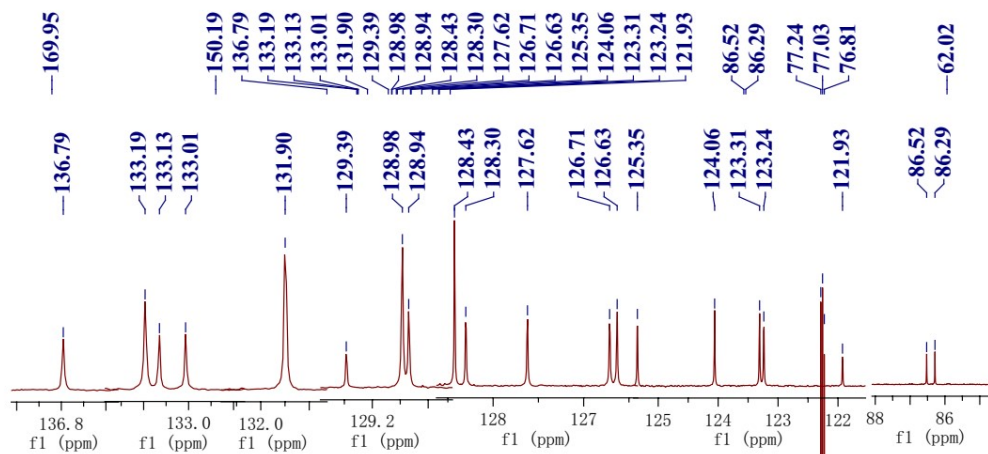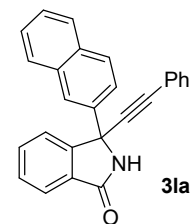

**<sup>13</sup>C NMR, CDCl<sub>3</sub>, 150 MHz**

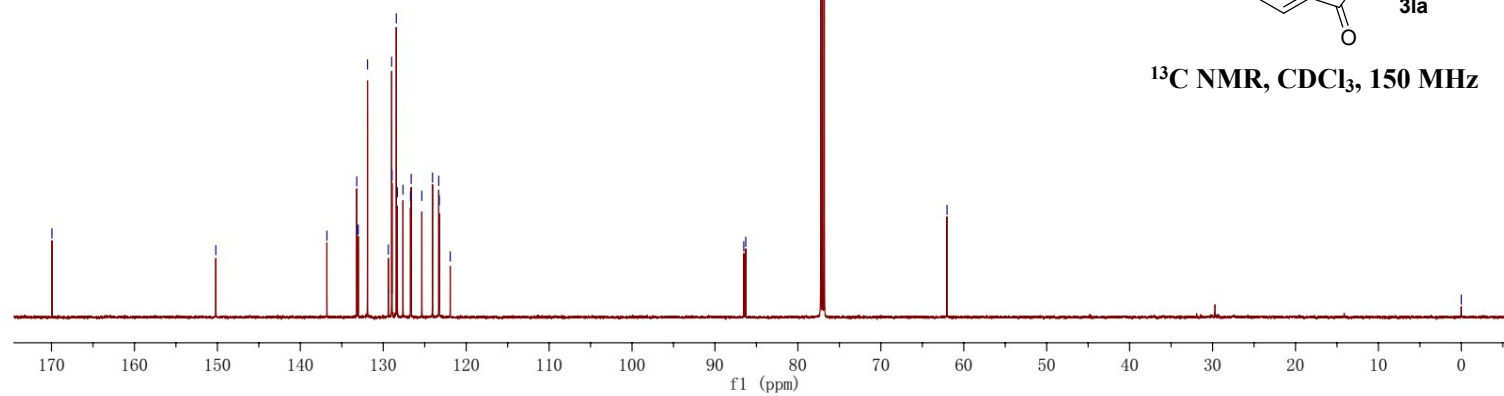

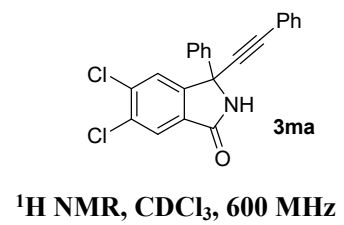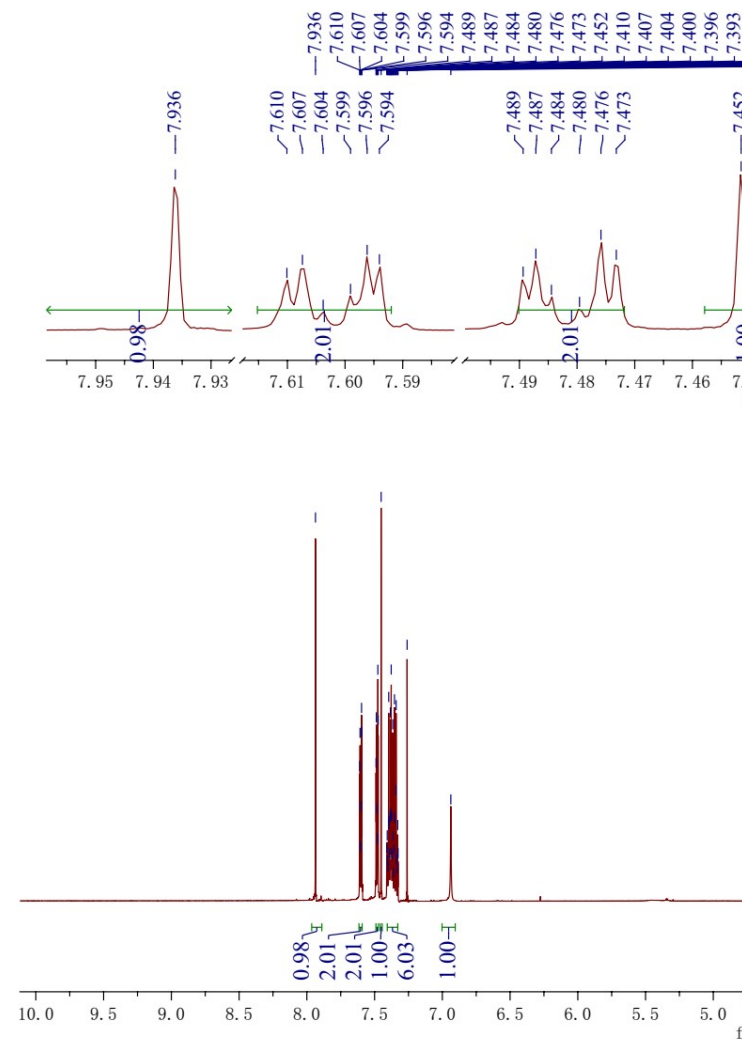

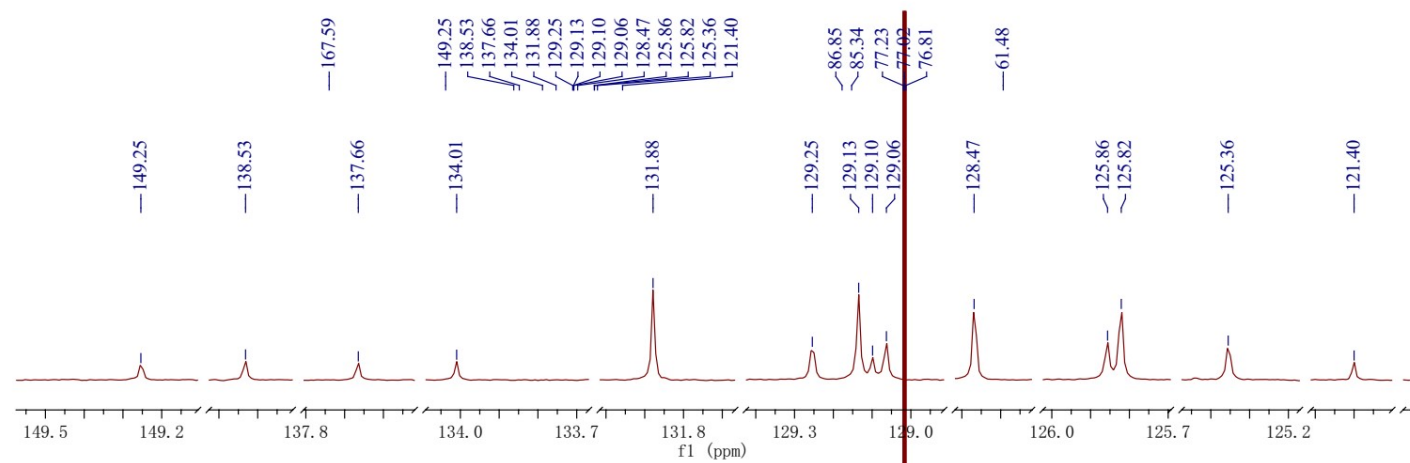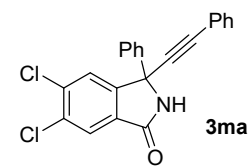

**<sup>13</sup>C NMR, CDCl<sub>3</sub>, 150 MHz**

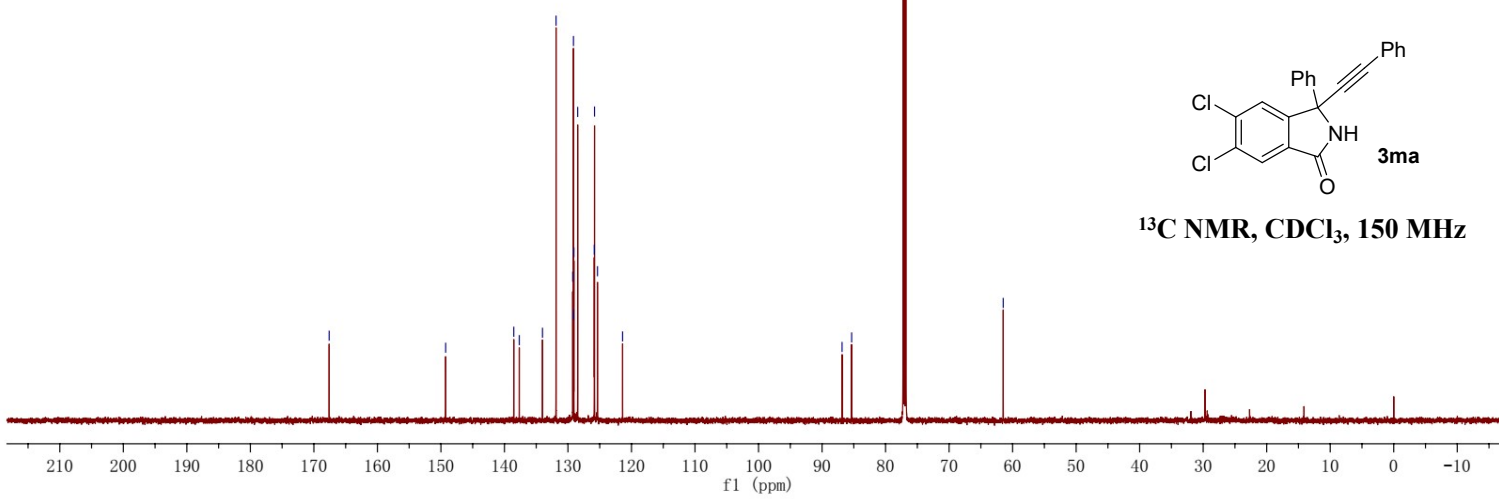

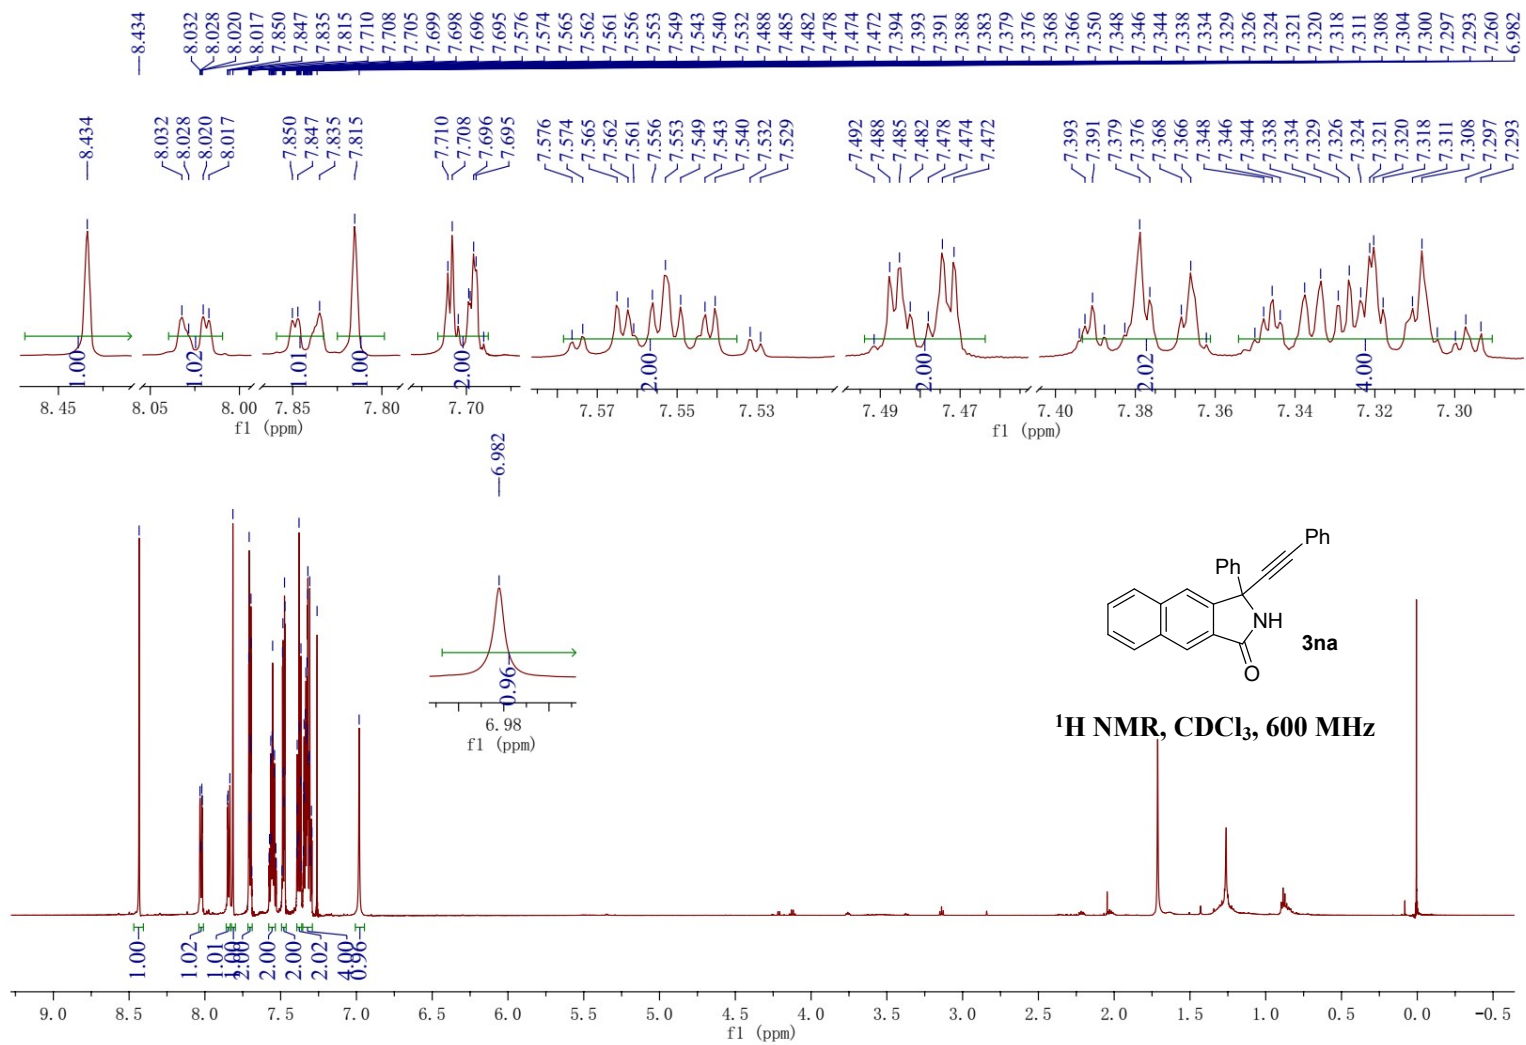



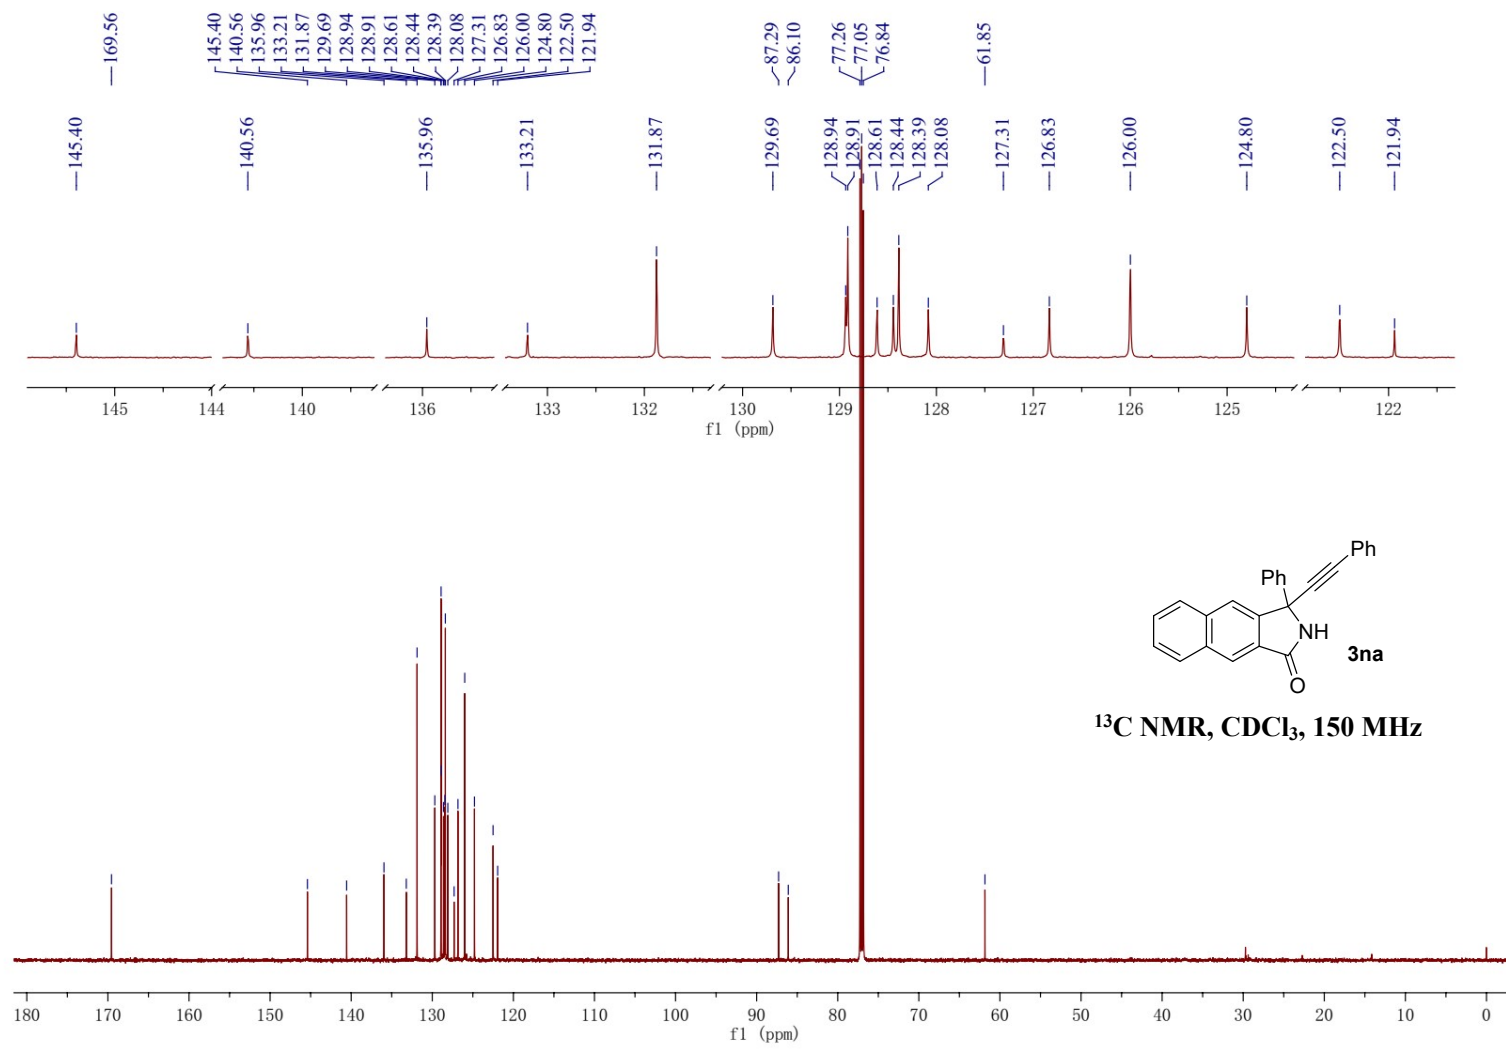

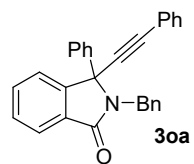

<sup>1</sup>H NMR, CDCl<sub>3</sub>, 600 MHz

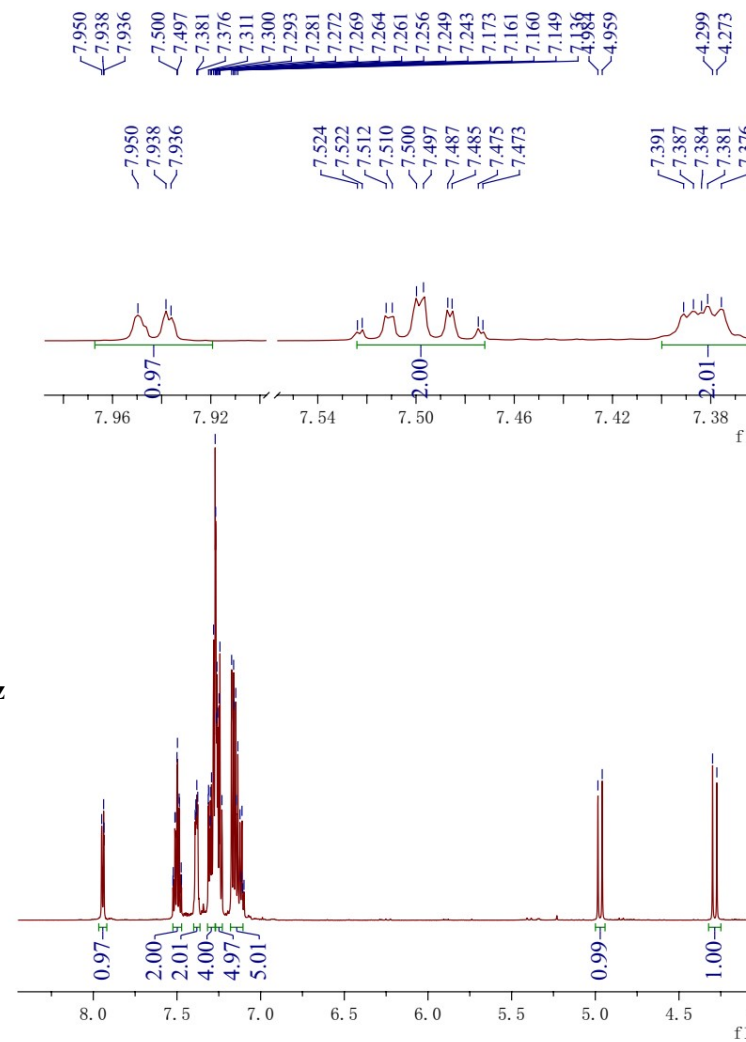

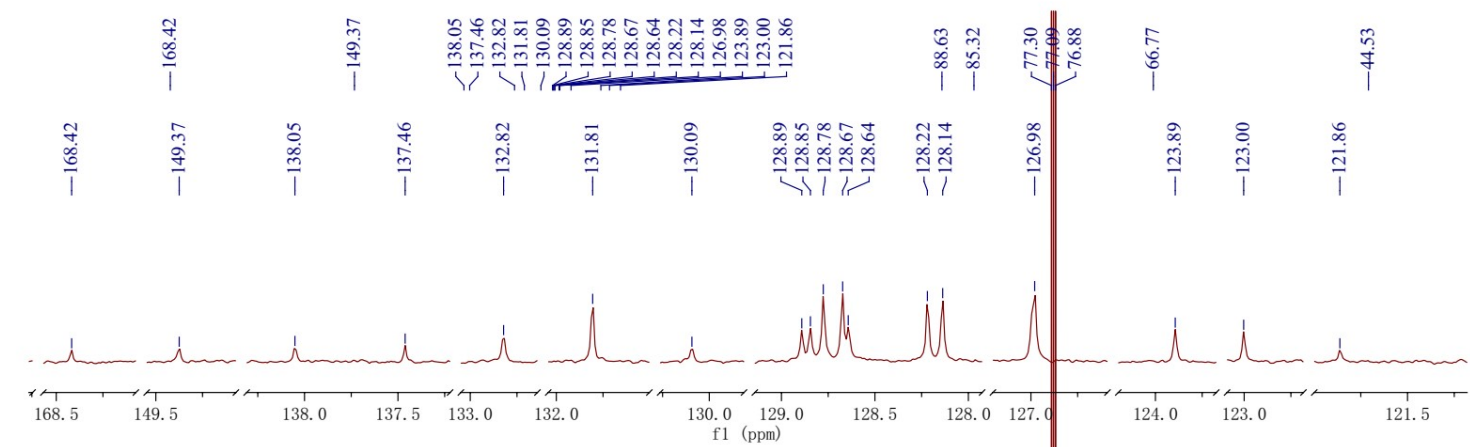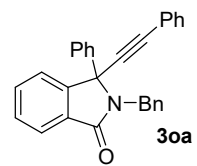

$^{13}\text{C}$  NMR,  $\text{CDCl}_3$ , 150 MHz

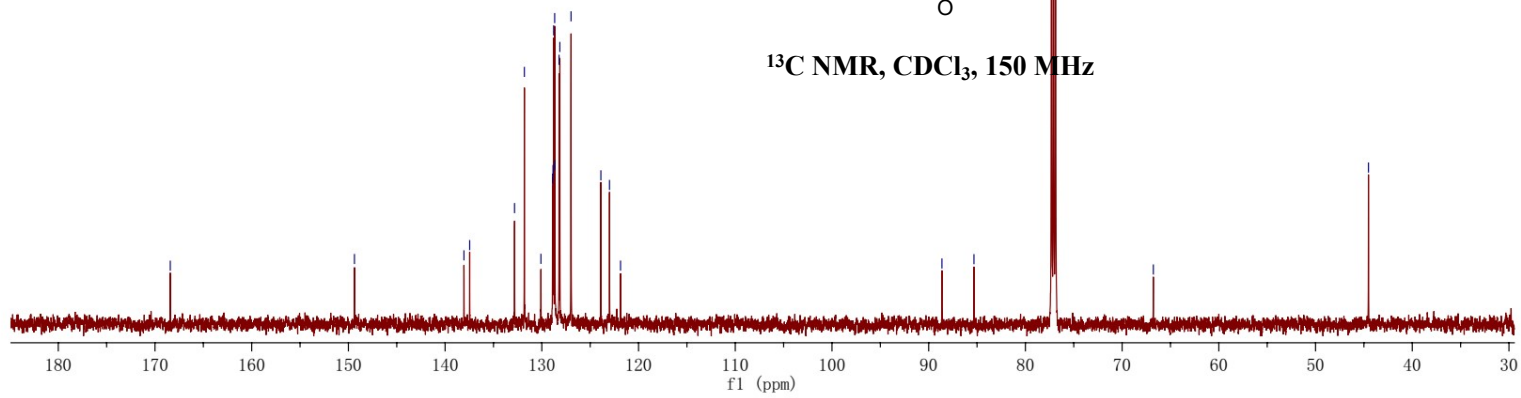

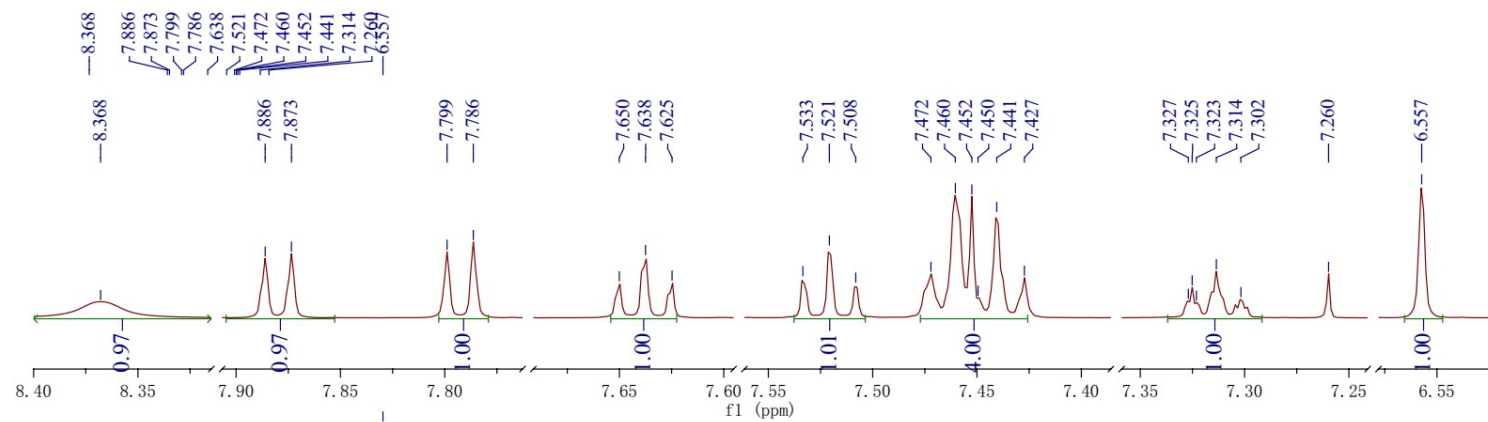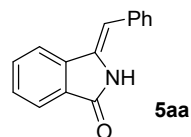

**<sup>1</sup>H NMR, CDCl<sub>3</sub>, 600 MHz**

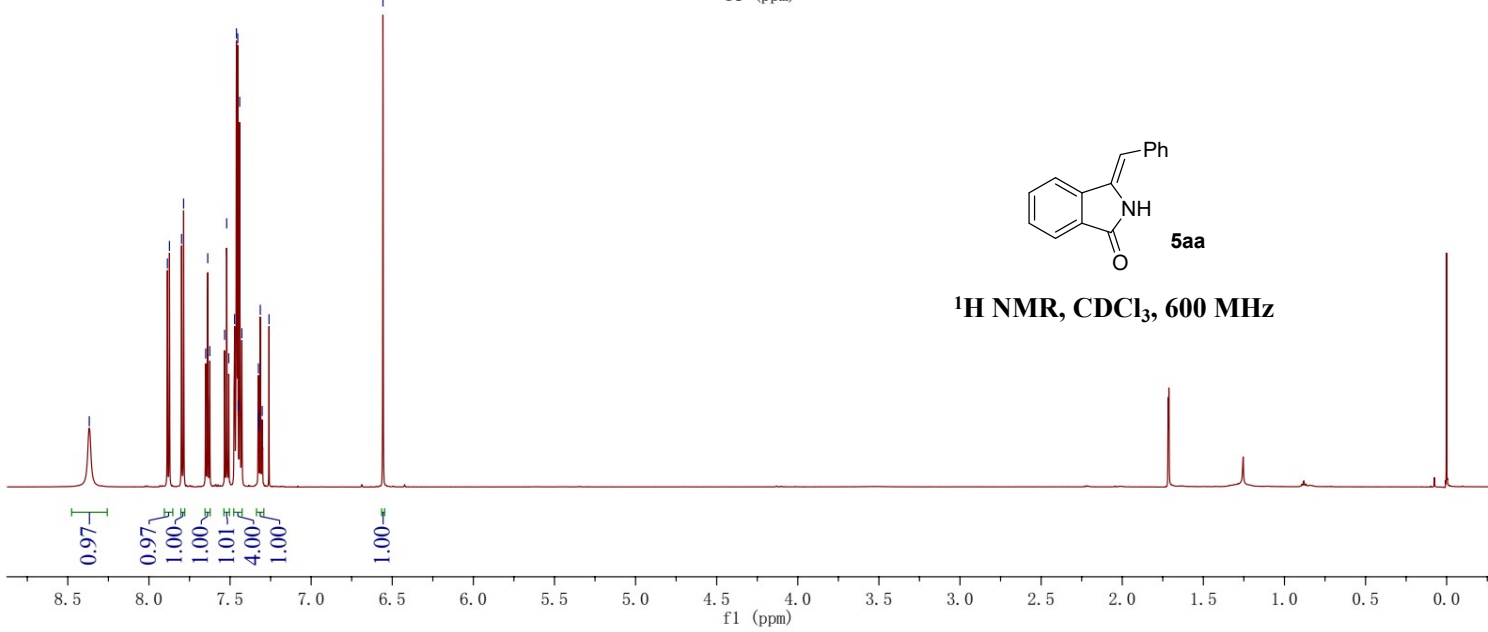

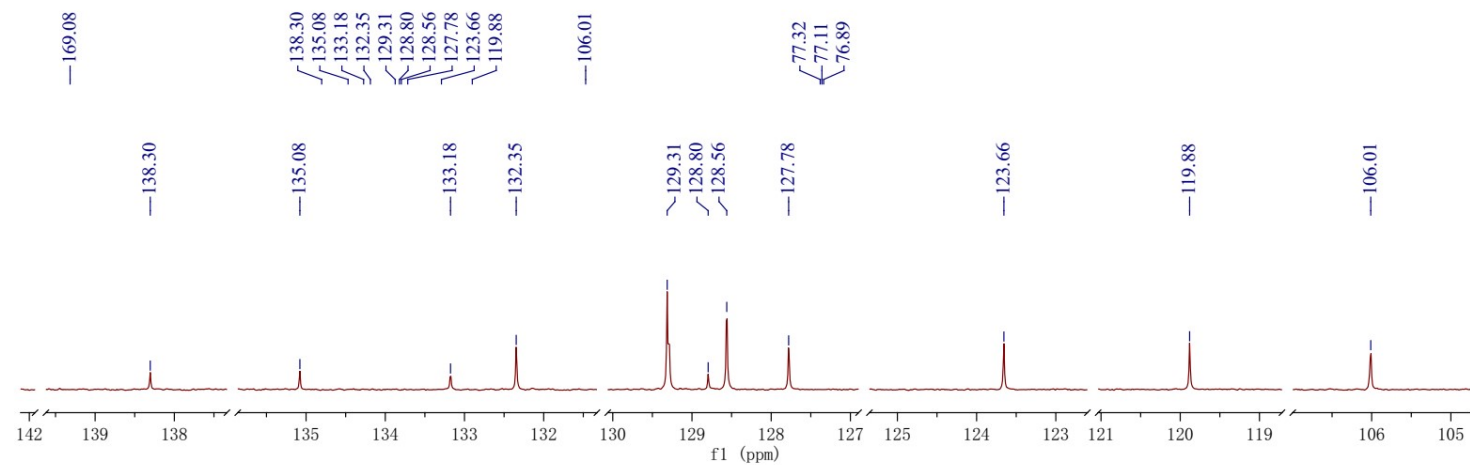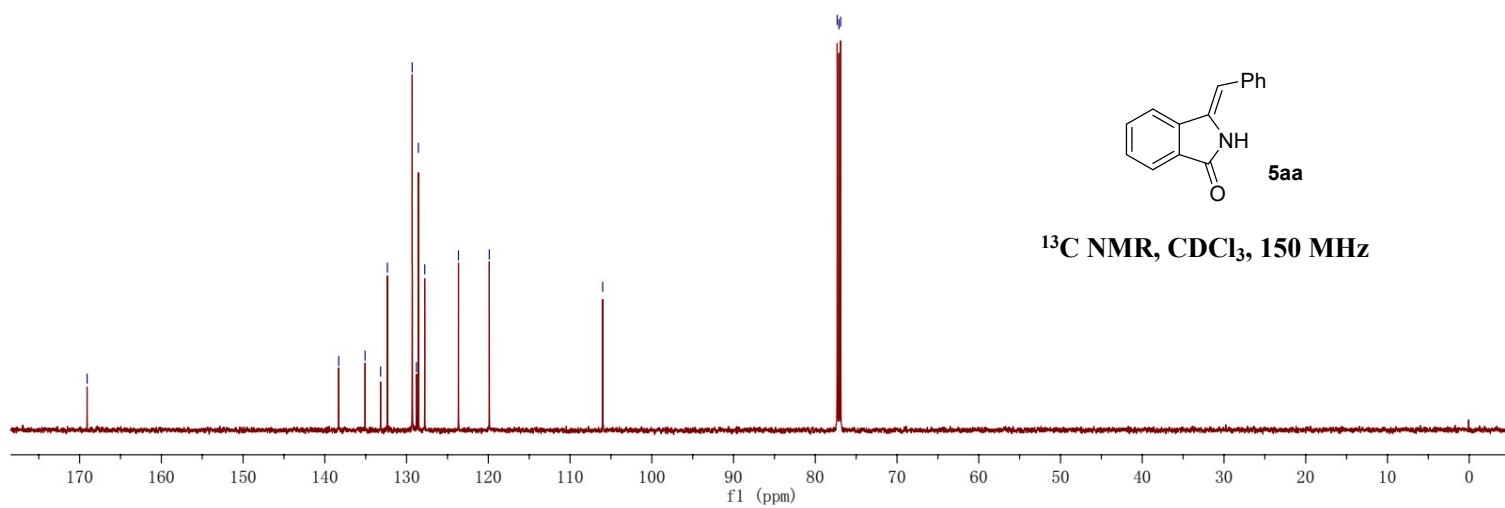

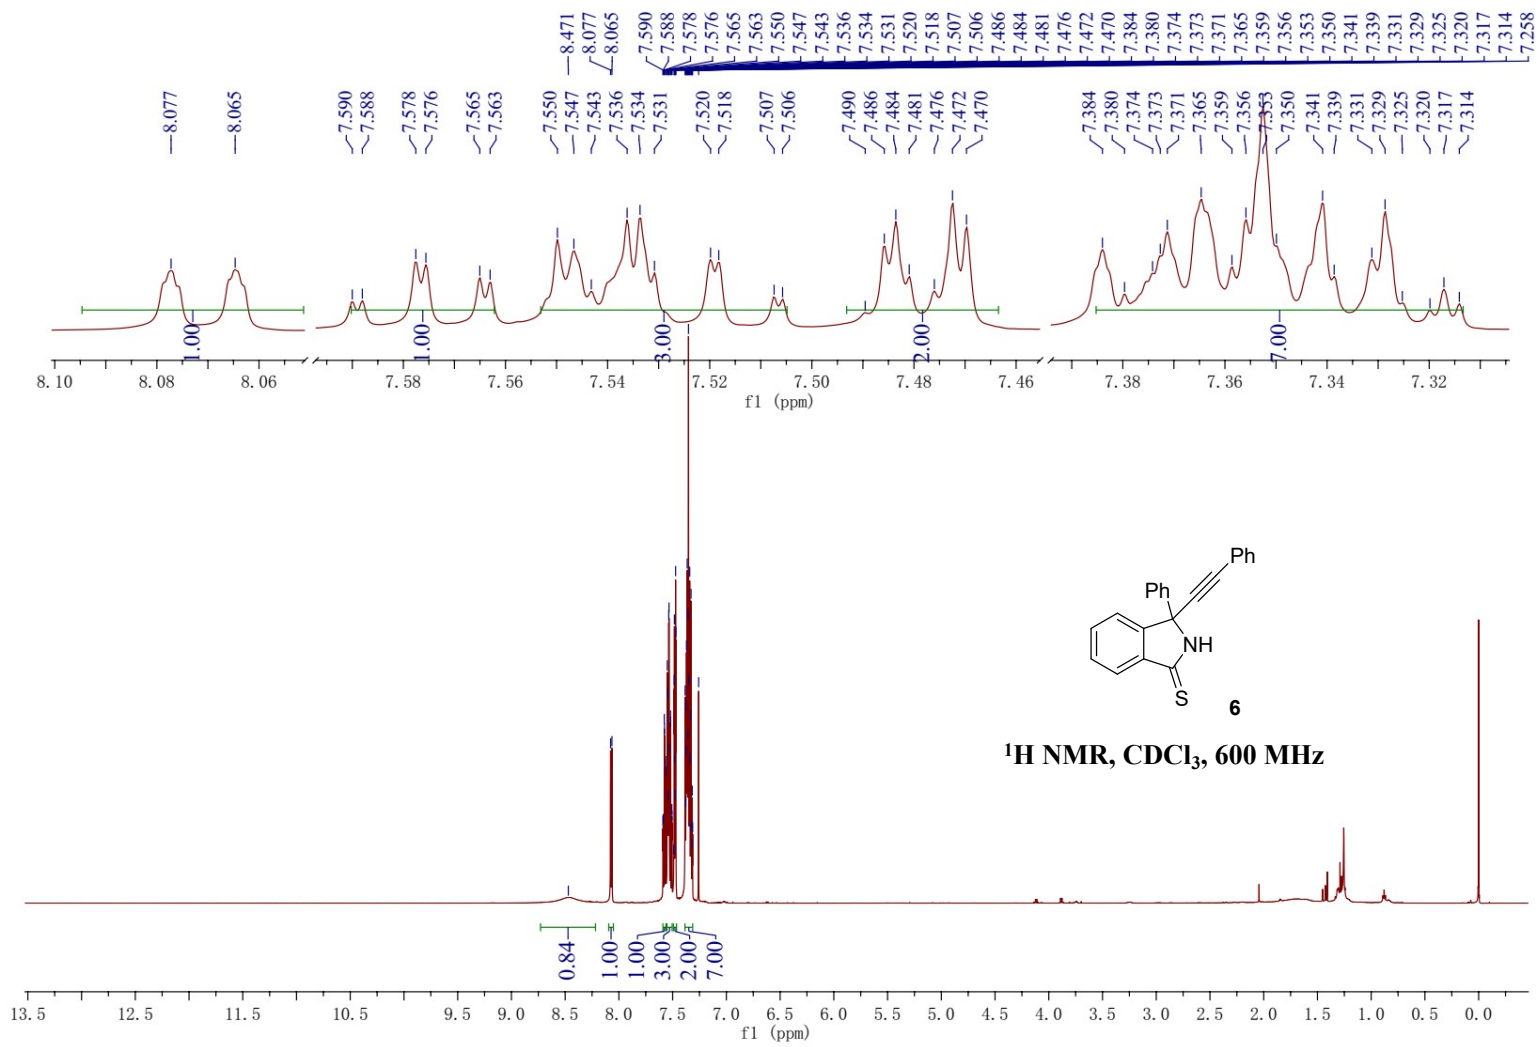

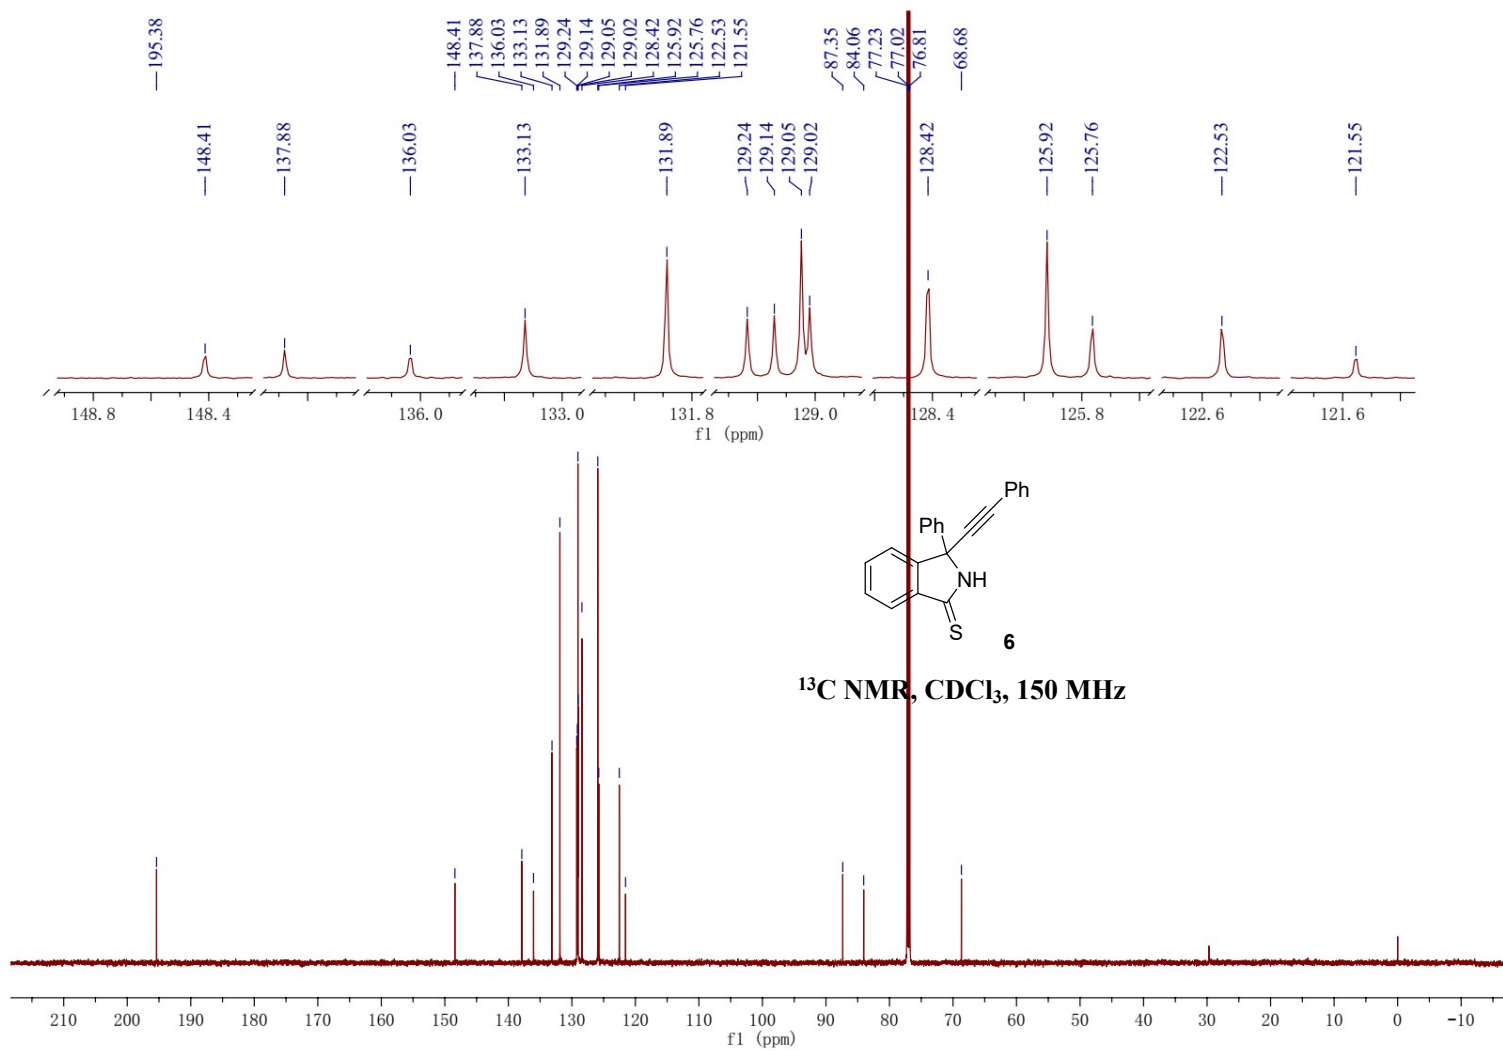

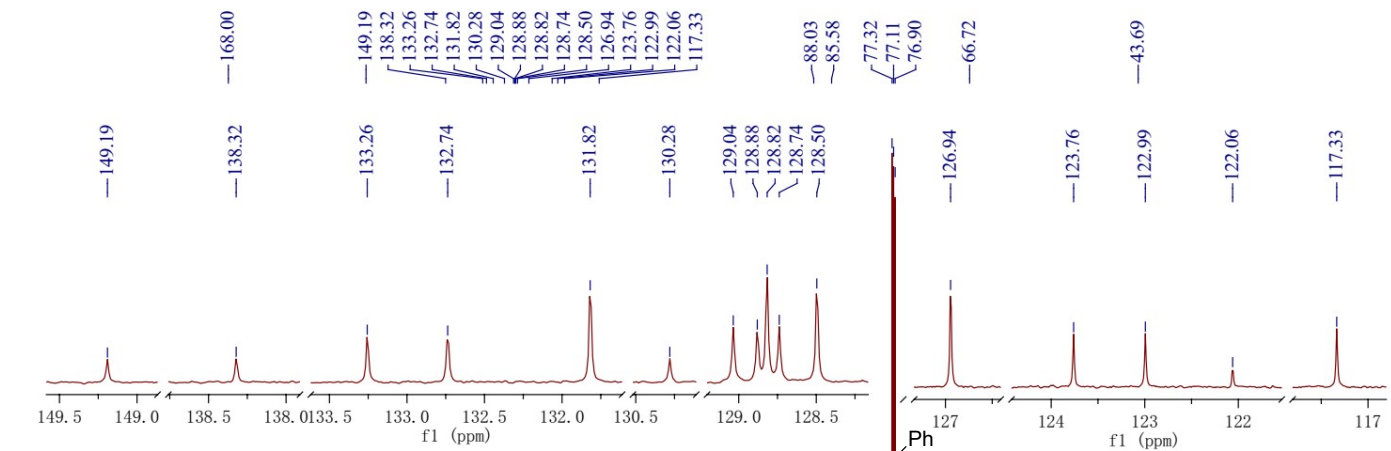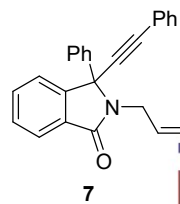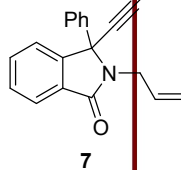

**<sup>1</sup>H NMR, CDCl<sub>3</sub>, 600 MHz**

**<sup>13</sup>C NMR, CDCl<sub>3</sub>, 150 MHz**

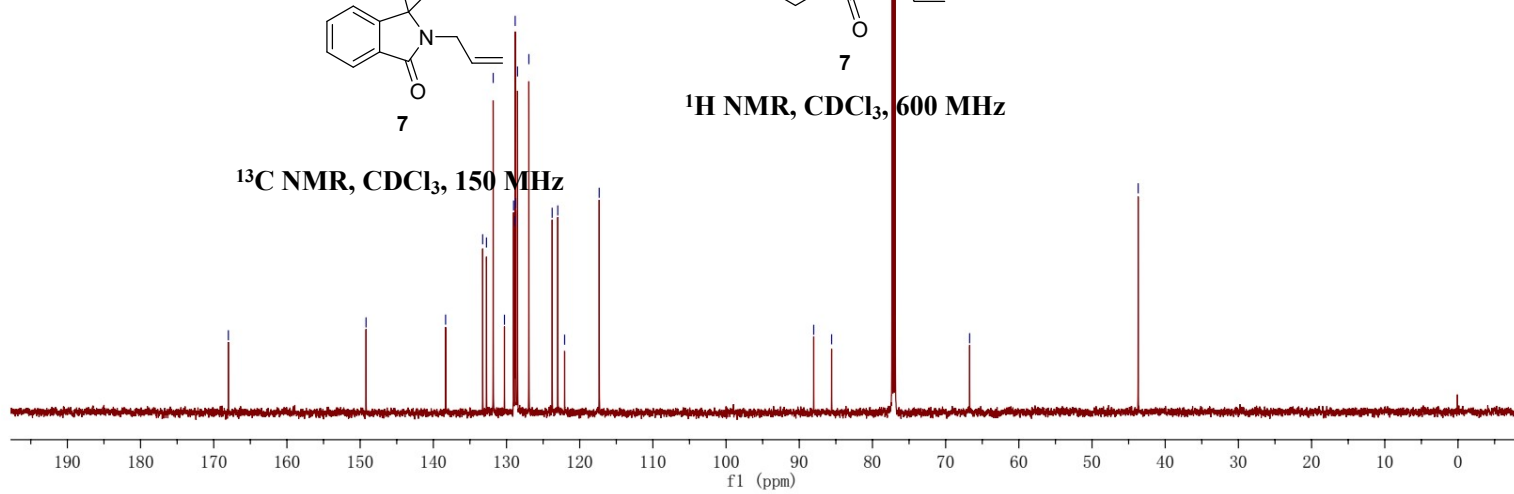



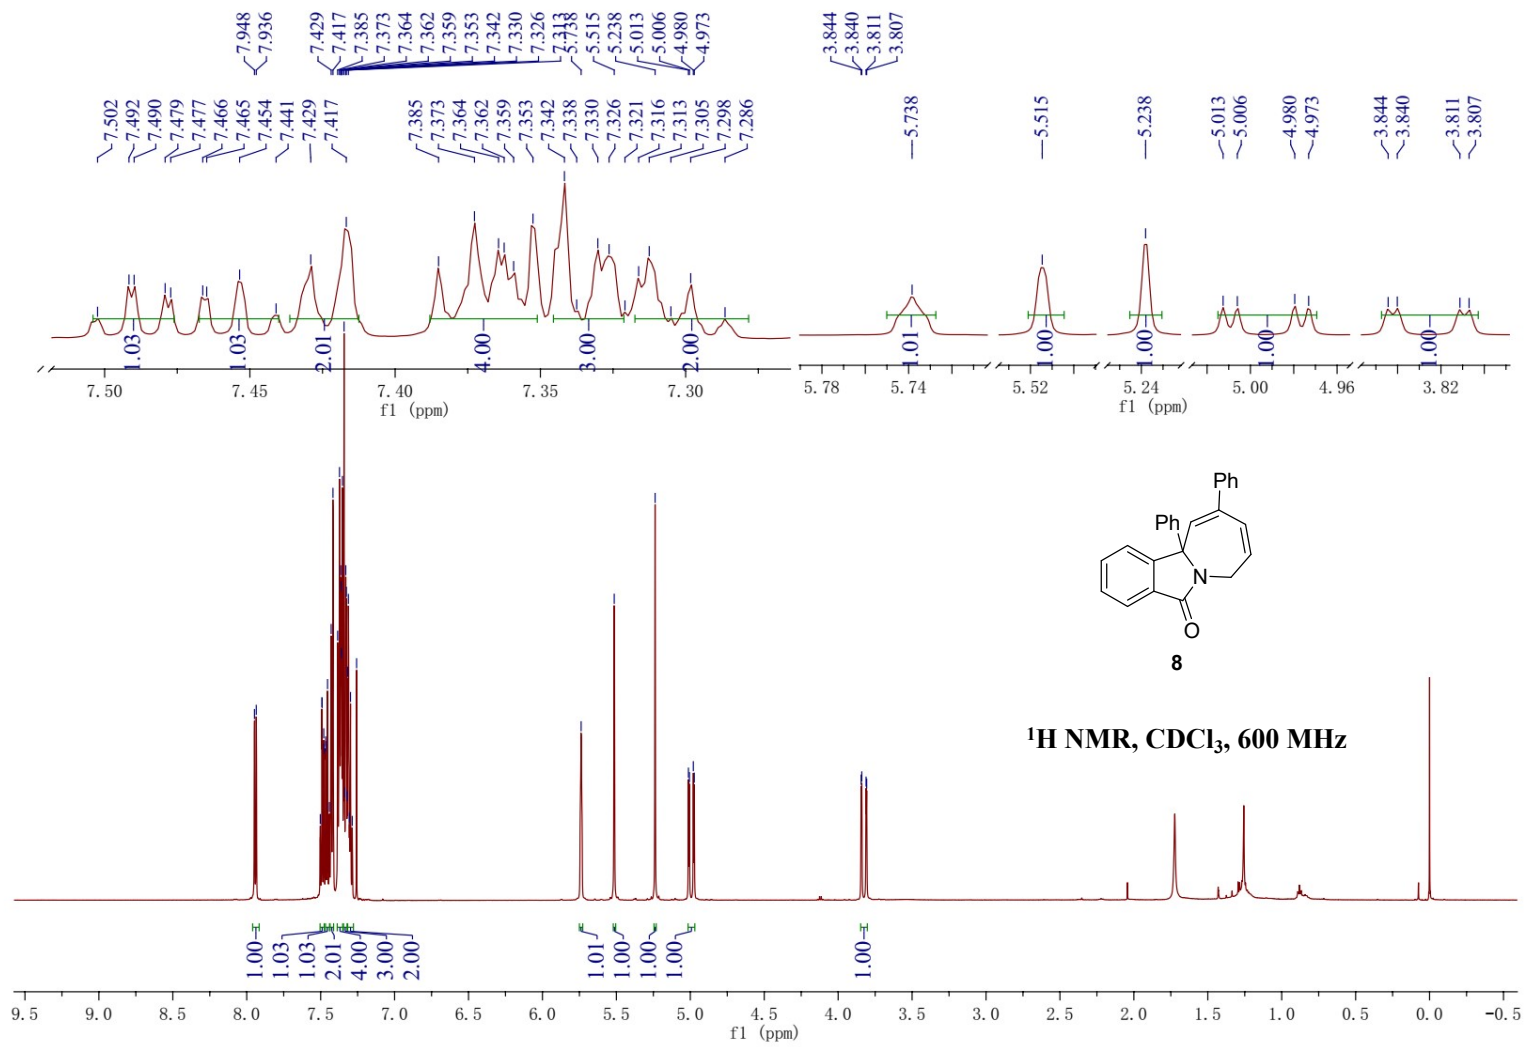

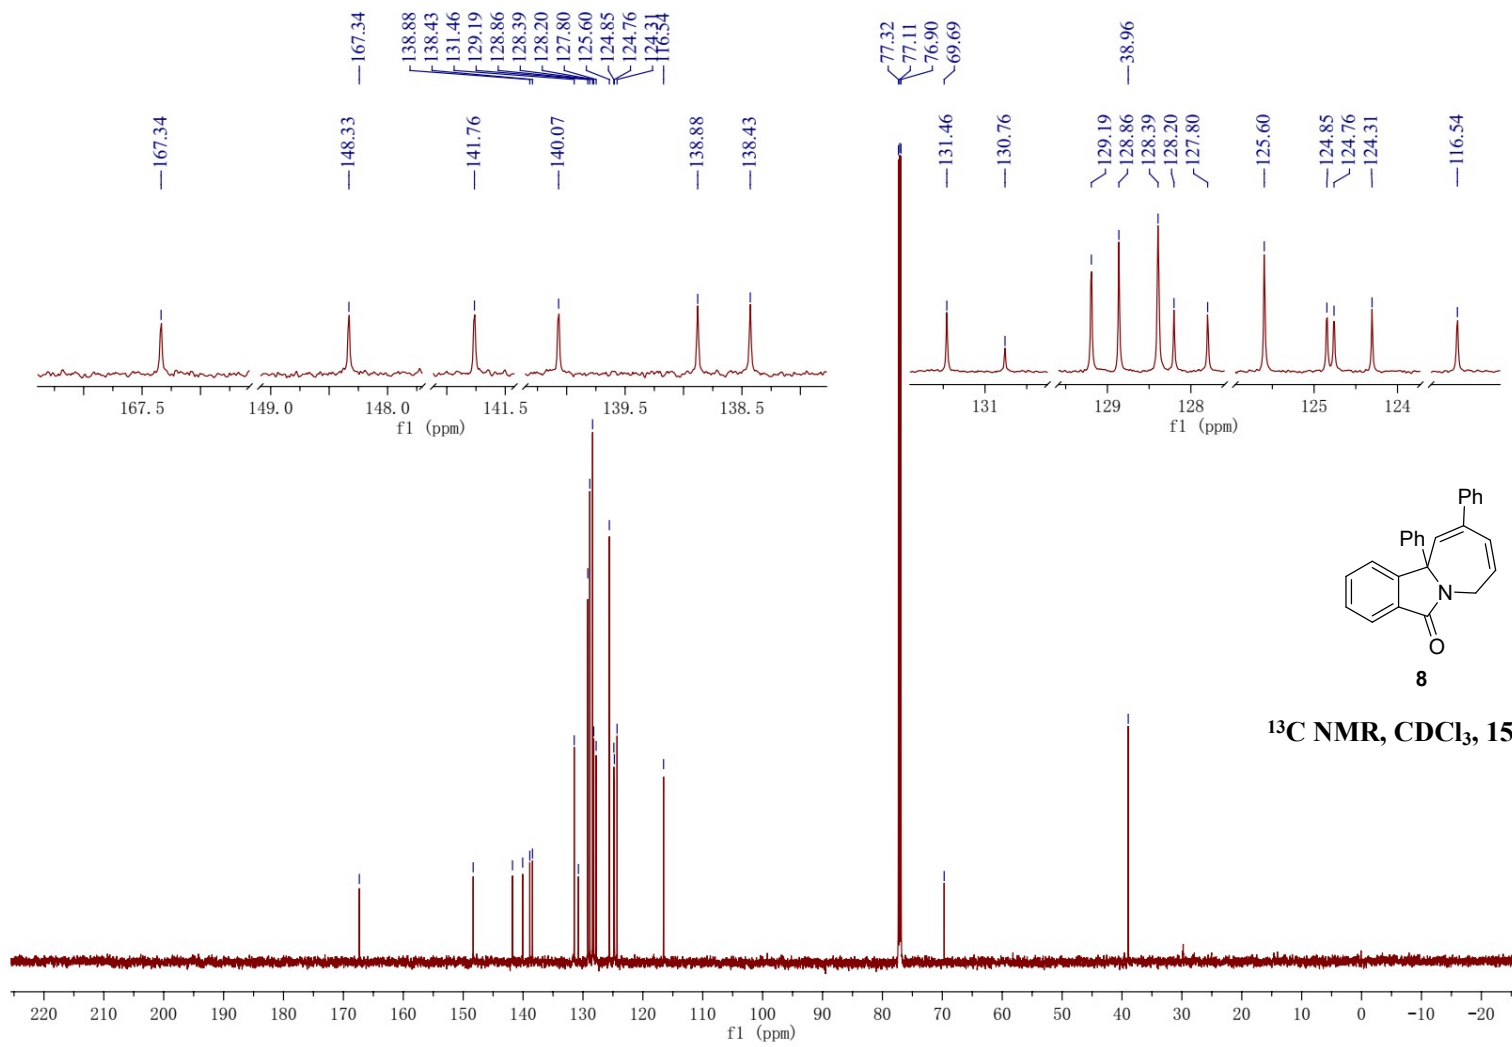

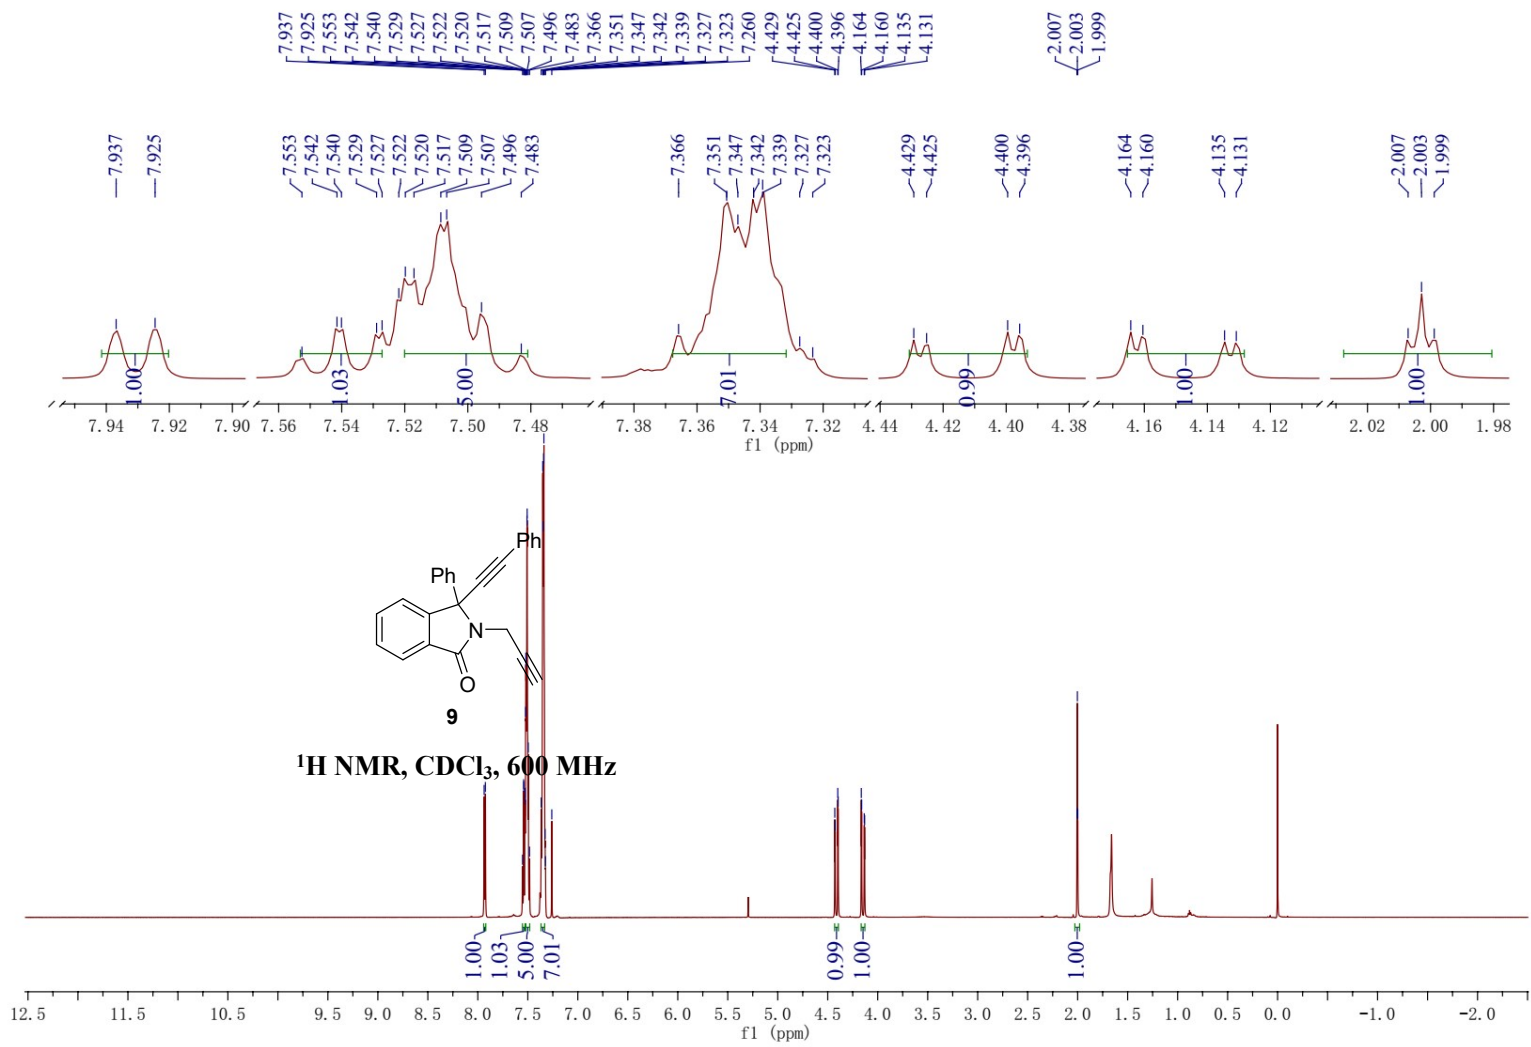

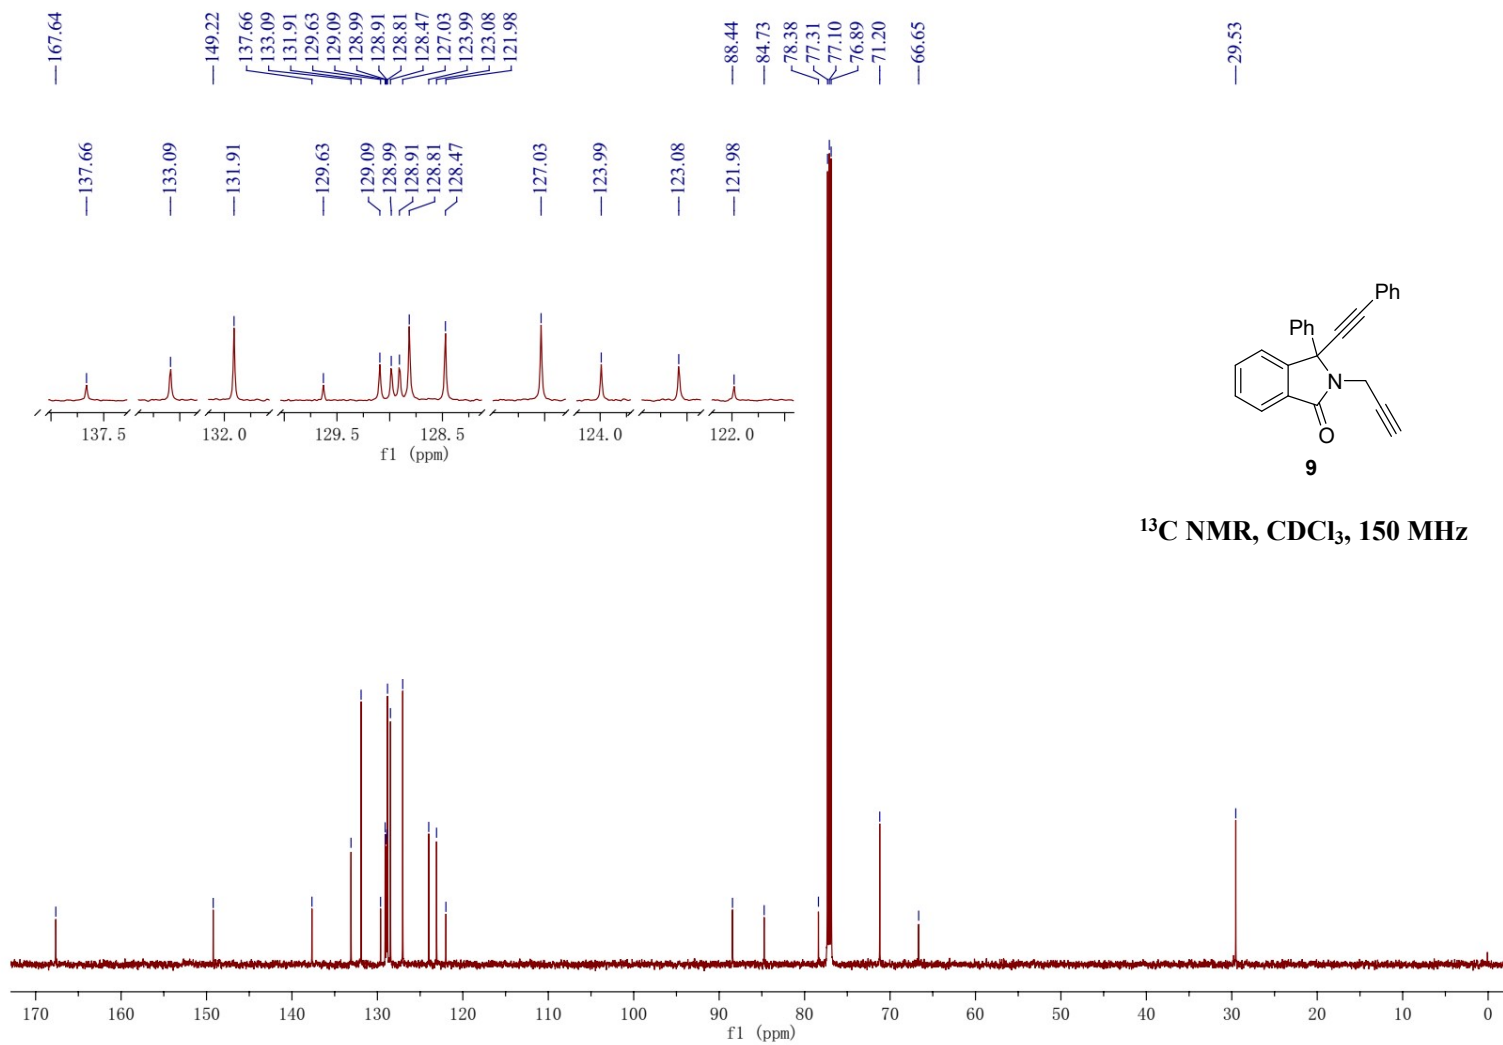

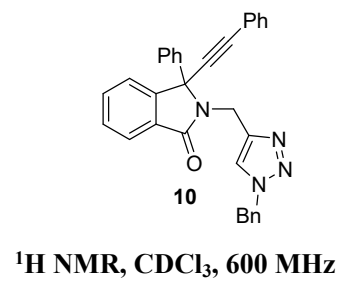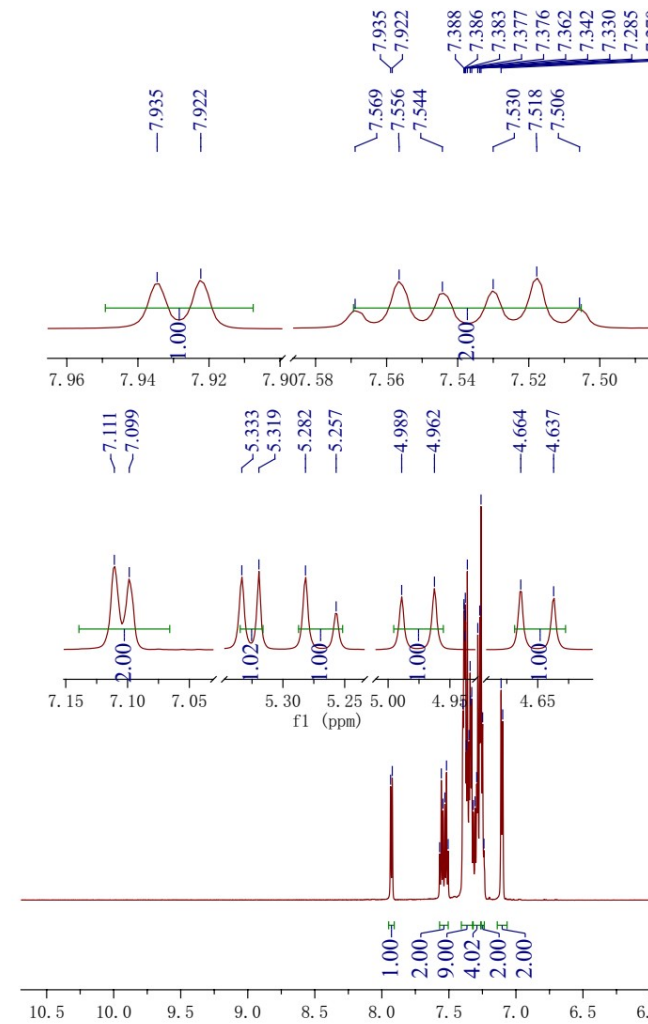

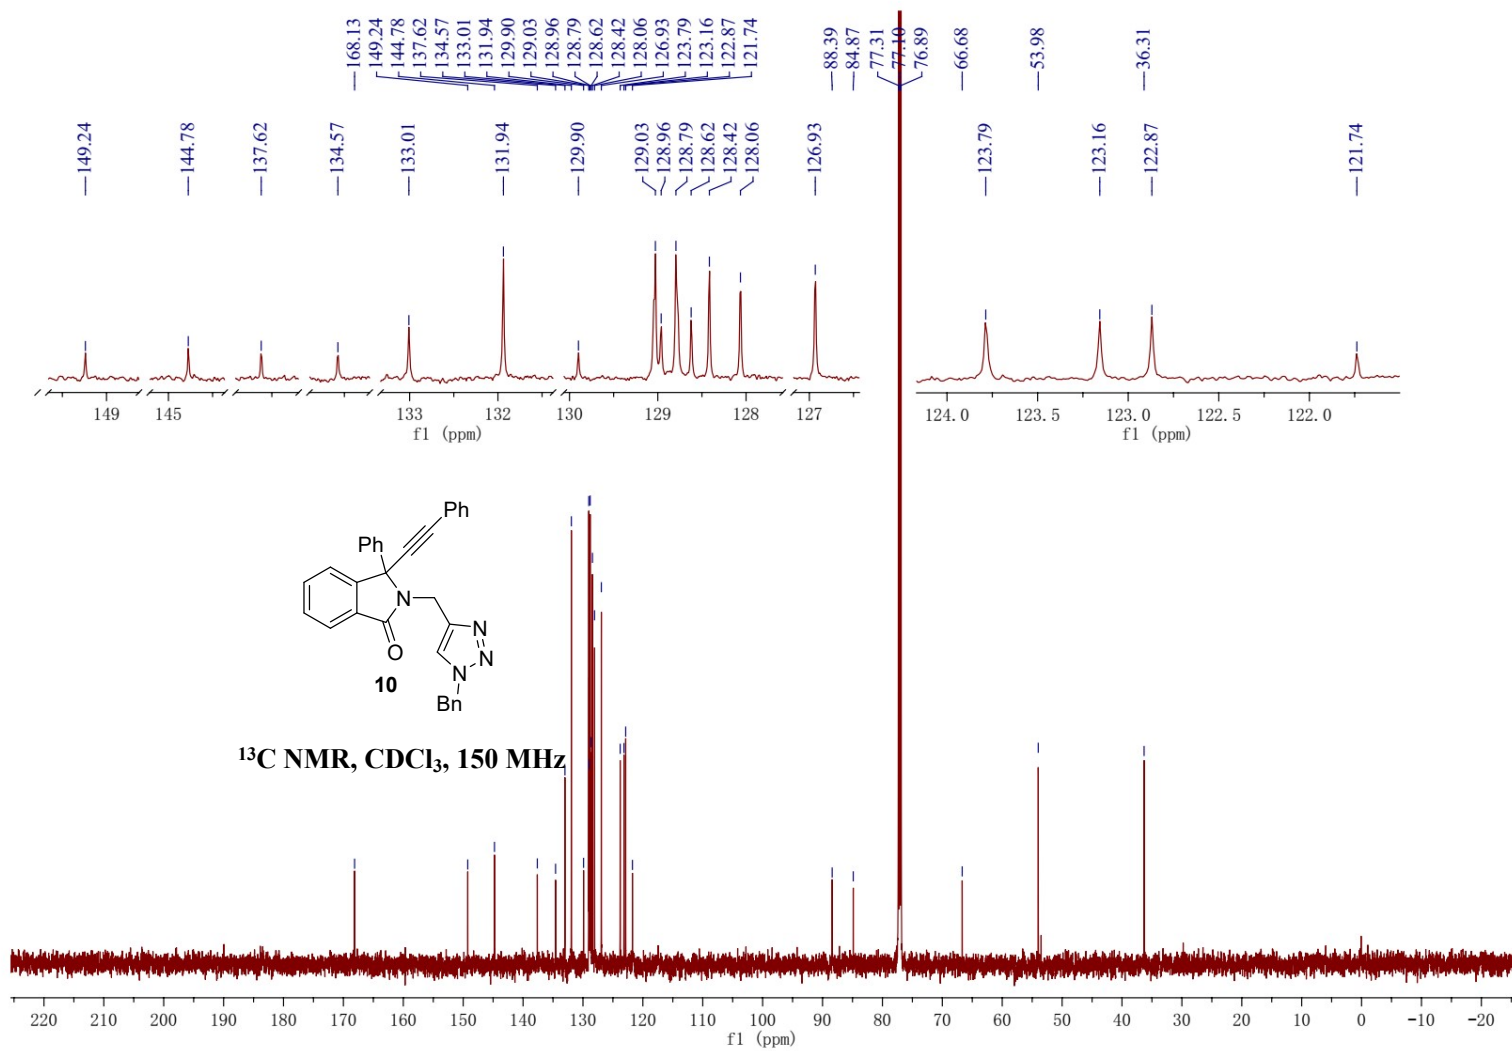

Supplement: d4ob00190g1.pdf [file d4ob00190g1.pdf]
